# Supplementary material for: Cross-sectional survey on job satisfaction and its associated factors among doctors in tertiary public hospitals in Shanghai, China
Source: PubMed Central journal article supplement — BMJ Open. 2019 Mar 1;9(3):e023823. doi: 10.1136/bmjopen-2018-023823 (PMC6429855; doi:10.1136/bmjopen-2018-023823), 2019-03-01
Supplement: bmjopen-2018-023823.draft_revisions.pdf [file bmjopen-2018-023823.draft_revisions.pdf]

# BMJ Open

BMJ Open is committed to open peer review. As part of this commitment we make the peer review history of every article we publish publicly available.

When an article is published we post the peer reviewers' comments and the authors' responses online. We also post the versions of the paper that were used during peer review. These are the versions that the peer review comments apply to.

The versions of the paper that follow are the versions that were submitted during the peer review process. They are not the versions of record or the final published versions. They should not be cited or distributed as the published version of this manuscript.

BMJ Open is an open access journal and the full, final, typeset and author-corrected version of record of the manuscript is available on our site with no access controls, subscription charges or pay-per-view fees (<http://bmjopen.bmj.com>).

If you have any questions on BMJ Open's open peer review process please email [editorial.bmjopen@bmj.com](mailto:editorial.bmjopen@bmj.com)

# BMJ Open

## A cross-sectional survey on job satisfaction and working condition among doctors in tertiary public hospitals in Shanghai, China

|                               |                                                                                                                                                                                                                                                                                                                                                                                                                                                                                                                     |
|-------------------------------|---------------------------------------------------------------------------------------------------------------------------------------------------------------------------------------------------------------------------------------------------------------------------------------------------------------------------------------------------------------------------------------------------------------------------------------------------------------------------------------------------------------------|
| Journal:                      | <i>BMJ Open</i>                                                                                                                                                                                                                                                                                                                                                                                                                                                                                                     |
| Manuscript ID                 | bmjopen-2018-023823                                                                                                                                                                                                                                                                                                                                                                                                                                                                                                 |
| Article Type:                 | Research                                                                                                                                                                                                                                                                                                                                                                                                                                                                                                            |
| Date Submitted by the Author: | 25-Apr-2018                                                                                                                                                                                                                                                                                                                                                                                                                                                                                                         |
| Complete List of Authors:     | Liu, Jiazhen; Shanghai Municipal Commission of Health and Family Planning, Shanghai Information Center for Health<br>Yu, Wenya; Second Military Medical University, College of Military Health Service Management<br>Ding, Tao; Second Military Medical University, College of Military Health Service Management<br>Li, Meina; Second Military Medical University, College of Military Health Service Management<br>Zhang, Lulu; Second Military Medical University, College of Military Health Service Management |
| Keywords:                     | job satisfaction, working condition, doctor, hospital, China                                                                                                                                                                                                                                                                                                                                                                                                                                                        |
|                               |                                                                                                                                                                                                                                                                                                                                                                                                                                                                                                                     |

SCHOLARONE™  
Manuscripts

1  
2  
3  
4 1 **A cross-sectional survey on job satisfaction and working**  
5  
6 2 **condition among doctors in tertiary public hospitals in**  
7  
8 **Shanghai, China**  
9

10 4 **Author list:** Jiazhen Liu <sup>\*,2</sup>, Wenya Yu <sup>\*,1</sup>, Tao Ding <sup>\*,1</sup>, Meina Li <sup>\*,1</sup>, Lulu Zhang <sup>\*\*,1</sup>

13 5 \*These authors contributed equally to the study.

16 6 \*\*Corresponding author: Lulu Zhang

18 7 E-mail: [zllrmit@aliyun.com](mailto:zllrmit@aliyun.com) (ZL)

20 8 Tel: +86 021-81871421

23 9 Fax: +86 021-81871436

25 10 Address: Department of Military Health Service Management, College of Military Health

28 11 Service Management, Second Military Medical University, Shanghai, China, 200433

30 12 1 Department of Military Health Service Management, College of Military Health Service

33 13 Management, Second Military Medical University, Shanghai, China, 200433

35 14 2 Shanghai Information Center for Health, Shanghai Municipal Commission of Health and Family

38 15 Planning, Shanghai, China, 200125

40 16 Jiazhen Liu (M. M), [liujiazhen@foxmail.com](mailto:liujiazhen@foxmail.com)

42 17 Wenya Yu (Ph. D), [jsjywuwenya@sina.cn](mailto:jsjywuwenya@sina.cn)

44 18 Tao Ding (M. M), [kindy292003@163.com](mailto:kindy292003@163.com)

46 19 Meina Li (Ph. D), [meinali53@sina.cn](mailto:meinali53@sina.cn)

48 20 Lulu Zhang (Ph. D), [zllrmit@aliyun.com](mailto:zllrmit@aliyun.com)

51  
52  
53 21

1  
2  
3  
4  
5  
6  
7  
8  
9  
10  
11  
12  
13  
14  
15  
16  
17  
18  
19  
20  
21  
22  
23  
24  
25  
26  
27  
28  
29  
30  
31  
32  
33  
34  
35  
36  
37  
38  
39  
40  
41  
42  
43  
44  
45  
46  
47  
48  
49  
50  
51  
52  
53  
54  
55  
56  
57  
58  
59  
60

## 22 Abstract

23 **Objectives:** Doctors in public hospitals of China face considerable pressure and excessive  
24 workloads, which has caused much dissatisfaction with their job. The purpose of this study was to  
25 explore the job satisfaction of doctors and examine the influence of different sociodemographic  
26 characteristics.

27 **Design:** It was a cross-sectional study.

28 **Setting:** 11 tertiary public hospitals in Shanghai, China.

29 **Participants:** Questionnaires were given out randomly to 897 doctors, and 730 were returned  
30 completed (response rate = 81.37%). Doctors who were voluntary and signed the informed  
31 consent can be involved in the investigation.

32 **Primary outcome measures:** Doctors' job satisfaction.

33 **Results:** 64.8% participants were dissatisfied with jobs, 35.2% reported job satisfaction. Statistical  
34 analysis suggested that doctors' job satisfaction was related with professional title, types of  
35 patients that doctors satisfied or expected, working stress and its reflections, department, working  
36 hours, life stress, and patients' respect.

37 **Conclusions:** There was an urgent need to establish a more reasonable promotion and income  
38 system, encourage patients to accept two-way referral, shorten working hours, and help doctors  
39 keep a balance between work and family.

40 **Keywords:** job satisfaction; working condition; doctor; hospital; China.

1  
2  
3  
4  
5  
6  
7  
8  
9  
10  
11  
12  
13  
14  
15  
16  
17  
18  
19  
20  
21  
22  
23  
24  
25  
26  
27  
28  
29  
30  
31  
32  
33  
34  
35  
36  
37  
38  
39  
40  
41  
42  
43  
44  
45  
46  
47  
48  
49  
50  
51  
52  
53  
54  
55  
56  
57  
58  
59  
60

42 **Strengths and limitations of this study**

- 43 ■ It provided a valuable reference for others interested in doctors' working conditions in China.
- 44 ■ This study has provided quantitative data on doctors' working conditions.
- 45 ■ Our research findings can only be representative of doctors in tertiary A public hospitals.
- 46 ■ Personal information of doctors was not included in the questionnaire.

For peer review only

## 48 **Background**

49 Work-related problems of doctors are growing global concerns, of which, doctors' job  
50 satisfaction was a heated topic<sup>1</sup>. Job satisfaction means a lot for individuals and the society, such as  
51 burnout<sup>2,3</sup>, mental health<sup>4</sup>, work-family balance<sup>5</sup>, and quality of care<sup>6</sup>. As the great importance of  
52 job satisfaction, studies have explored a lot about job satisfaction, including the status of different  
53 dimensions about job satisfaction, a large number of surveys on job satisfaction and its influencing  
54 factors, and interrelationships between burnout, work stress, mental health and job satisfaction  
55 among doctors, nurses, and medical staff in different departments, regions and countries. Scholars  
56 from different countries such as the United States, the United Kingdom, and German have tried to  
57 deal with problems about job dissatisfaction<sup>7-9</sup>. It was discovered that many factors had an  
58 influence on job satisfaction, including job pressure<sup>10,11</sup>, interrelationships with patients and  
59 colleagues<sup>12,13</sup>, personal factors (e.g., gender and educational background)<sup>14</sup>, risk of the job<sup>15</sup>,  
60 personal mental health<sup>16</sup>, job size<sup>17</sup>, financial status<sup>18</sup>, specialty and department<sup>19,20</sup>. In addition,  
61 doctors themselves also paid great attention to job satisfaction. Doctors worldwide have kept  
62 fighting for their own rights to improve job satisfaction, working condition, professional  
63 accomplishments, and career development for a long time. For example, doctors in Poland<sup>21</sup> and  
64 the Czech Republic<sup>22</sup>, have had conflicts with the governments regarding to overwork. Fortunately,  
65 doctors in many countries and regions have succeeded in this fight, which ultimately improve their  
66 job satisfaction, working efficiency, and care quality<sup>23</sup>.

67 Moreover, health care reform was always a significant stage leading to great changes in  
68 doctors' job satisfaction and working condition. China is in such an important stage. In the  
69 Chinese health care reform, the government paid considerable attention to reducing medication

1  
2  
3  
4 70 costs<sup>24</sup>. Hospitals were expected to sell drugs to patients without adding a 15% profit, which may  
5  
6 71 decrease the hospital's income<sup>25</sup>. Other policies such as controlling medication fees per visit and  
7  
8 72 the cost of medical insurance have reduced doctors' decision-making power. Consequently,  
9  
10  
11 73 hospital management may force doctors to work overtime to augment or maintain hospital income  
12  
13 74 if there was not enough compensation from the government<sup>26</sup>. Doctors had to change their  
14  
15  
16 75 behaviours to fulfil hospital income indicators. In China, 4,526,978<sup>27</sup> doctors were under  
17  
18 76 increasing pressures to see more patients, meet increased administrative requirements, and keep up  
19  
20  
21 77 with government regulations. Moreover, the lives of doctors are threatened in hospitals due to  
22  
23 78 poor doctor-patient relationships<sup>28</sup>. As doctors were overworked, underpaid, and under threat,  
24  
25  
26 79 some scholars have wondered who will be the next doctors in China<sup>29</sup>.

27  
28 80 Therefore, to improve the poor hope of being a doctor in China and to change the current  
29  
30  
31 81 condition of doctors' job dissatisfaction, the main purpose of this study was to find out factors  
32  
33 82 influencing job satisfaction among doctors in China and provide practical recommendations to  
34  
35  
36 83 improve Chinese doctors' working conditions and their job satisfaction.

## 37 38 84 **Methods**

### 39 40 41 85 ***Subjects***

42  
43 86 Between 18 June and 27 September 2013, a cross-sectional survey on doctors' job  
44  
45  
46 87 satisfaction was conducted in Shanghai, China. 1000 doctors in 11 public hospitals were selected  
47  
48 88 at random, however, 897 were willing to participant in the study. Among the 897 questionnaires,  
49  
50  
51 89 730 were returned completed (there were not any missing data) with a valid response rate of  
52  
53 90 81.38%. Doctors who were voluntary and signed the informed consent can be involved in the  
54  
55  
56 91 investigation. To address the bias coming from misunderstandings of the questionnaire,  
57

1  
2  
3  
4 92 researchers of our program were responsible to explain confusing questions when doctors filled in  
5  
6 93 questionnaires.

7  
8 94 ***Instrument Development and Validation***  
9

10  
11 95 The questionnaire was designed to examine doctors' working conditions as well as their job  
12  
13 96 satisfaction. The questionnaire was designed based on the 5th National Health Service General  
14  
15 97 Research by the National Health and Family Planning Commission of the People's Republic of  
16  
17 98 China. The general survey of the National Health Service included job satisfaction of medical staff.  
18  
19 99 It was a rigorously developed instrument, based on the well-known and widely used Minnesota  
20  
21 100 Satisfaction Questionnaire. The content validity was verified through an expert panel discussion,  
22  
23 101 which included 5 experts. Cronbach's  $\alpha$  coefficient was calculated to test the internal consistency  
24  
25 102 of this questionnaire, with the value of 0.646. The Kaiser-Meyer-Olkin (KMO) test was used as a  
26  
27 103 screening test for factorability, for which the value of KMO between 0.7 and 0.8 indicated good  
28  
29 104 validity. In this study, the KMO was 0.703 ( $P < 0.001$ ), which suggested acceptable validity.

30  
31 105 The instrument collected data on sociodemographic variables such as age, gender, level of  
32  
33 106 education, position, professional title, and department. There were some multiple-choice questions  
34  
35 107 about types of patients, including patients' types that doctors considered reasonable in different  
36  
37 108 healthcare institutions, types doctors diagnosed actually, doctors' satisfaction with types of  
38  
39 109 patients, and what types of patients they expect. In addition, it asked about doctors' working time,  
40  
41 110 life stress, working stress, and the sources of working stress. This survey also required doctors to  
42  
43 111 rate their relationship with patients and evaluate the medical expenses of their patients. Questions  
44  
45 112 about working and life stress, and doctor-patient relationship were on a Likert 5-point scale, such  
46  
47 113 as completed not respectful, relatively not respectful, moderate, relatively respectful, and very  
48  
49  
50  
51  
52  
53  
54  
55  
56  
57  
58  
59  
60



1  
2  
3  
4 114 respectful. Moreover, the question about doctors' job satisfaction was the observational variable.  
5

#### 6 115 ***Ethical Approval*** 7

8 116 The study protocol was approved by the ethics committee of the Second Military Medical  
9  
10 117 University. Only voluntary doctors signing the informed consent were involved in this survey. It  
11  
12 118 was guaranteed to protect participants' confidentiality.  
13  
14

#### 15 119 ***Statistical Analysis*** 16

17  
18 120 All data were entered into Epidata version 3.1 and analysed using SPSS version 19.0.  
19  
20 121 Sociodemographic data were described using frequencies and percentages. Chi-square tests were  
21  
22 122 employed to test the relations between doctors' job satisfaction and other factors. Logistic  
23  
24 123 regression analysis was further used to verify the influence of factors on doctors' job satisfaction.  
25  
26 124 All tests were two-way and  $p < 0.05$  was considered statistically significant.  
27  
28  
29  
30

### 31 125 **Results** 32

#### 33 126 ***Characteristics, working condition, and job satisfaction*** 34

35  
36 127 897 questionnaires were given out to doctors and all were returned. Among 897  
37  
38 128 questionnaires, 730 were returned completed and without any missing data. Of the 730 valid  
39  
40 129 questionnaires, 64.8% were dissatisfied with jobs, 35.2% reported job satisfaction. Male  
41  
42 130 participants (55.8%) were more than the female (44.2%). More than half (70.6%) of them had an  
43  
44 131 education level of master's or doctor's degree. Most participants were doctors (87.3%), only a  
45  
46 132 small of them were directors (7.5%), unspecified staff (4.9%), and researchers (0.3%). The  
47  
48 133 majority (75.5%) had a junior or intermediate professional title. Half of participants (54.5%)  
49  
50 134 worked 46-60 hours a week. Most participants (85.0%) can partly or totally reach the hospital  
51  
52 135 requirement on their working. In terms of life and working stress, 78.0% and 87.5% participants  
53  
54  
55  
56  
57  
58  
59  
60

1  
2  
3  
4 136 reported they were suffering from great pressure; 78.9% reported their current working stress  
5  
6 137 increased compared to that in the past year. Considering the aspects of working stress, the top  
7  
8 138 three aspects reflecting working stress were working intensity (65.8%), long working time  
9  
10 139 (57.7%), and high risk of the job (55.2%). In addition, only 36.3% doctors reported that their  
11  
12 140 departments once organized a community health lecture; 56.4% departments once participated in a  
13  
14 141 volunteer medical consultation. Moreover, participants believed patients with difficultly-diagnosed  
15  
16 142 diseases (66.3%), serious diseases (62.1%), and rare diseases (53.3%) should seek medical  
17  
18 143 treatment in tertiary A hospitals. However, in most participants' working time, they usually met  
19  
20 144 patients with common diseases (83.0%), chronic diseases (67.9%), and the requirement of  
21  
22 145 prescribing medicine (41.2%); only half of them (51.2%) were satisfied with the type of patients  
23  
24 146 they met. When talking about which type of patients they expected, participants chose patients  
25  
26 147 with difficultly-diagnosed diseases (63.0%), common diseases (52.1%), and serious diseases  
27  
28 148 (47.7%). In the range of types of patients should seek medical treatment in community health  
29  
30 149 system, most participants chose patients with common diseases (76.2%), the requirement of  
31  
32 150 prescribing medicine (71.0%), and chronic diseases (66.7%). When evaluating the medical  
33  
34 151 expenses of their patients, about half of participants (52.5%) thought the medical expenses were  
35  
36 152 relatively or completely too expensive. Lastly, less than half of participants (43.8%) felt being  
37  
38 153 respected by their patients (Table 1).  
39  
40  
41  
42  
43  
44  
45  
46

#### 154 **Table 1 Characteristics, working condition, and job satisfaction of participants**

##### 155 *Univariate analysis of job satisfaction and its influencing factors*

156 According to chi-square test, the relationships between job satisfaction and other factors were  
157 examined. Results indicated that some factors were significantly influenced doctors' job  
158  
159  
160

1  
2  
3  
4 158 satisfaction, including professional title ( $p = 0.005$ ), department ( $p = 0.042$ ), working hours every  
5  
6 159 week ( $p = 0.015$ ), whether the work within working hours can reach the hospital requirement ( $p =$   
7  
8 160  $0.008$ ), life stress ( $p < 0.0001$ ), working stress ( $p < 0.0001$ ), whether current working stress  
9  
10  
11 161 increased compared to that in the past year ( $p < 0.0001$ ), whether work intensity was the reflection  
12  
13 162 of great working stress ( $p < 0.0001$ ), whether long working time was the reflection of great  
14  
15 163 working stress ( $p < 0.0001$ ), whether high risk of the job was the reflection of great working stress  
16  
17 164 ( $p < 0.0001$ ), whether poor patient-doctor relationship was the reflection of great working stress ( $p$   
18  
19 =  $0.001$ ), whether fierce competition of professional title promotion was the reflection of great  
20  
21 165 working stress ( $p = 0.001$ ), whether bad social evaluation was the reflection of great working  
22  
23 166 stress ( $p < 0.0001$ ), whether patients with any kinds of diseases should seek medical treatment in  
24  
25 167 tertiary A hospitals ( $p = 0.04$ ), whether patients with requirement of prescribing medicine was the  
26  
27 168 most doctors met in working hours ( $p < 0.0001$ ), whether doctors were satisfied with the types of  
28  
29 169 patients ( $p < 0.0001$ ), whether patients with common diseases were the population doctors  
30  
31 170 expected ( $p = 0.005$ ), whether patients with acute diseases were the population doctors expected ( $p$   
32  
33 171 =  $0.005$ ), and the extent patients respected doctors ( $p < 0.0001$ ).

34  
35  
36  
37  
38  
39  
40 173 **Table 1 Characteristics, working condition, and job satisfaction of participants**

41  
42  
43 174 ***Logistic regression analysis of job satisfaction and its influencing factors***

44  
45 175 Logistic regression analysis suggested that doctors' job satisfaction was related with such  
46  
47 176 factors as junior professional title ( $p = 0.024$ ), satisfaction with types of patients ( $p = 0.006$ ), not  
48  
49 177 expecting patients with common diseases ( $p = 0.041$ ), working stress not increasing compared to  
50  
51 178 that in the past year ( $p = 0.045$ ), not considering work intensity was the reflection of great working  
52  
53 179 stress ( $p = 0.011$ ), and not considering bad social evaluation was the reflection of great working  
54  
55  
56  
57  
58  
59  
60

1  
2  
3  
4 180 stress ( $p = 0.002$ ). In addition, values of ORs and 95% Wald confidence interval indicated the  
5  
6 181 exact relationships. Compared to doctors with senior professional titles, doctors with junior  
7  
8 182 professional titles were less satisfied with their job ( $OR = 0.420$ ). Similar result was found among  
9  
10  
11 183 doctors did not expect patients with common diseases in most of working hours (vs. doctors  
12  
13 184 expect patients with common diseases) ( $OR = 0.668$ ). On the other side, doctors who were  
14  
15 185 satisfied with the types of patients they met in working hours were more likely to be satisfied with  
16  
17 186 their job compared to those without a clear feeling about this question ( $OR = 2.130$ ). Doctors  
18  
19 187 whose working stress did not get greater than that in the past year were more satisfied with their  
20  
21 188 job ( $OR = 2.192$ ). Doctors who did not consider work intensity ( $OR = 1.698$ ) and bad social  
22  
23 189 evaluation ( $OR = 2.097$ ) were not reflections of great working stress shared more job satisfaction  
24  
25  
26  
27  
28 190 (Table 2).

#### 191 **Table 2 Logistic regression analysis of job satisfaction and its influencing factors**

### 192 **Discussion**

193 According to results of this study, doctors' job satisfaction was influenced their professional  
194 title, patient composition, and working stress. Some factors like department, working hours,  
195 patients' respect, and life stress may also be related to job satisfaction.

196 First, unlike some studies in other countries and regions, demographic characteristics (e.g.,  
197 gender and education background) were not influencing factors of job satisfaction<sup>30 31</sup>. Only  
198 doctors' professional title played a role, which was proved by other studies in China<sup>5</sup> and Canada<sup>32</sup>.  
199 Among doctors with junior professional titles, they were less satisfied with their job, which may  
200 be attributed to many other factors. Because doctors' income was related to their professional  
201 title<sup>33</sup>, annual income of doctors with junior professional title was always lower than that of

1  
2  
3  
4 202 doctors with senior professional title. However, studies have proposed that income had a positive  
5  
6 203 influence of doctors' job satisfaction<sup>2,5,18,34</sup>. In addition, a study in the United Kingdom presented  
7  
8 204 that young staff may fail to fully use their training, which was one of the possible reasons for low  
9  
10  
11 205 satisfaction<sup>8</sup>. This can also be explained by opportunities to use abilities and personal  
12  
13 206 accomplishment during daily work, which were other aspects impeding young staff enjoying job  
14  
15 207 satisfaction<sup>35</sup>. Moreover, doctors with junior professional title in China faced more difficulties. A  
16  
17  
18 208 study in China investigated the professional title system and discovered that doctors felt unfair in  
19  
20  
21 209 promotion of their professional titles<sup>36</sup>. It can be understood that young staff had greater demands  
22  
23 210 of promotion, which would cause more dissatisfaction among them. Furthermore, the new policy  
24  
25 211 about specialist standardisation training put more pressures on young staff, which required doctors  
26  
27  
28 212 to do an additional 2-4 years of specialist training after completing 3 years of resident  
29  
30  
31 213 standardisation training<sup>37</sup>. During this process, these young doctors were extremely unsatisfied  
32  
33 214 with their income, when they were undertaking great economic burdens to support their families.  
34  
35 215 Therefore, all these factors explained why doctors with junior professional titles were less likely to  
36  
37  
38 216 be satisfied with their job.

39  
40 217 Second, patient composition was a significant factor influencing doctors' job satisfaction,  
41  
42  
43 218 which was for a particular phenomenon of China. Based on this survey, only 51.2% doctors were  
44  
45 219 satisfied with types of patients they diagnosed, and the most were those with common diseases,  
46  
47  
48 220 which was the key leading to doctors' job dissatisfaction. Unlike the extreme two-way referral  
49  
50 221 system in many developed countries (e.g., the United States), patients in China can choose any  
51  
52  
53 222 health institutions they prefer<sup>38</sup>. This discipline caused overcrowding in tertiary A public  
54  
55 223 hospitals<sup>39</sup>, no matter which types of diseases. In fact, many patients with common, mild, or  
56  
57  
58  
59  
60

1  
2  
3  
4 224 chronic diseases did not need to visit tertiary A public hospitals, which led to a waste of  
5  
6 225 high-quality medical resources. Under this circumstance, doctors who wanted to eliminate pains of  
7  
8 226 patients with serious, rare, or difficultly-diagnosed diseases would be disappointed at their work  
9  
10  
11 227 and feel desperate to improve themselves during clinical practices<sup>7</sup>. Therefore, job dissatisfaction  
12  
13 228 appeared. To solve this problem, controlling hospital patient flow logistics<sup>40</sup> was the point.  
14  
15  
16 229 Encouraging patients and doctors to accept two-way referral was important, however, it should  
17  
18 230 improve the health care quality of family doctors to make patients trust them. Moreover, it should  
19  
20  
21 231 realize that inadequate time spent in treatment of difficultly-diagnosed, serious, and rare diseases  
22  
23 232 had a negative effect on doctors' skill development, which was the key point causing doctors' job  
24  
25  
26 233 dissatisfaction. Policy-makers and hospital administrators should provide more opportunities to  
27  
28 234 doctors expecting patients with uncommon diseases, especially for those young staff.

29  
30  
31 235 Third, working stress was another important factor of job satisfaction, which was also  
32  
33 236 discovered by another study<sup>5</sup>. However, there was a new finding from this study, relative working  
34  
35 237 stress (e.g., comparing working stress to that in the past year) was more significant to predict job  
36  
37  
38 238 satisfaction than absolute working stress (e.g., evaluation of working stress at present). Doctors  
39  
40  
41 239 felt greater relative working stress would be more likely to be dissatisfied with their job. In  
42  
43 240 addition, it should pay more attention to which aspect doctors considered as the reflection of  
44  
45  
46 241 working stress, especially the aspect of work intensity and social evaluation. Doctors in tertiary A  
47  
48 242 public hospitals usually undertook great amount of clinical tasks, for example, owing to the  
49  
50  
51 243 excessive patients, doctors had to diagnose and treat them as fast as possible, which always  
52  
53 244 compelled them to quit drinking water or going to the toilet<sup>41</sup>. What's worse, several doctors were  
54  
55 245 reported a sudden death due to the huge work intensity<sup>42</sup>. Similar studies in other countries have

1  
2  
3 246 also stated that work intensity had a negative effect on job satisfaction<sup>730</sup>. Moreover, improving  
4  
5  
6 247 social evaluation would promote doctors' job satisfaction. At present, doctors did not have a good  
7  
8 248 reputation because some of them pursued for personal economic interests by prescribing  
9  
10  
11 249 unnecessary medicine or tests for patients<sup>43</sup>. It must be pointed out that, however, many other  
12  
13 250 doctors without such behaviours were trapped in such an embarrassing dilemma. Our society  
14  
15  
16 251 should maintain an objective and impartial attitude towards most doctors and supervise those with  
17  
18 252 a poor reputation.

19  
20 253 Fourth, it should pay attention to the working time. Working overtime has caused low job  
21  
22  
23 254 satisfaction and it was a problem among doctors worldwide, such as Britain<sup>44</sup>, Spain<sup>45</sup>, and  
24  
25 255 Switzerland<sup>34</sup>. This research finding was similar. Although the European Working Time Directive  
26  
27  
28 256 ruled that junior doctors should work no more than 48 hours per week<sup>46</sup>, it was unrealistic in  
29  
30 257 China. Doctors had to work overtime, which often deprived their family time and spare time.  
31  
32  
33 258 However, a study has proposed that work-private hours played a significant role in job  
34  
35 259 satisfaction<sup>17</sup>. In addition, in Chinese hospitals, doctors' payment was based on performance,  
36  
37  
38 260 which indicated that whether doctors met job requirements was much more important than long  
39  
40 261 working hours. Moreover, performance was critical for promotion, especially for junior doctors.  
41  
42  
43 262 Therefore, the contradiction between promotion, income and long working time led to job  
44  
45 263 dissatisfaction. There was an urgent need to shorten working hours per week and change current  
46  
47 264 disciplines for promotion and income<sup>47</sup>.

48  
49  
50 265 Fifth, it means a lot for doctors whether patients respected them. Owing to the overcrowding  
51  
52 266 patients in tertiary A public hospitals, patients had to spend a long waiting time for registering,  
53  
54  
55 267 paying, and taking medicine compared to a short time meeting doctors. This unreasonable  
56  
57  
58  
59  
60

1  
2  
3  
4 268 phenomenon has reduced patients' satisfaction and their respect for doctors, and sometimes even  
5  
6 269 violence against doctors<sup>48</sup>. To deal with this problem, a good patient-doctor relationship should be  
7  
8 270 established by reducing patients in tertiary A public hospitals. If patients were willing to seek  
9  
10 271 medical treatment in community healthcare system, doctors in tertiary A hospitals would spend  
11  
12 272 more time diagnosing, treating, and communicating with patients while staying a good and patient  
13  
14 273 attitude. To realize it, enhancing the community healthcare system and encouraging patients to  
15  
16 274 choose health institutions reasonably were both important<sup>49</sup>.

17  
18  
19  
20 275 Last, life stress was the other aspect of stress-related phenomena combined with working  
21  
22 276 stress. Some syndromes such as depression, burnout syndrome, and other psychiatric reactions  
23  
24 277 should be taken into consideration<sup>50</sup>. Work-family conflict should also be addressed reasonably to  
25  
26 278 avoid job dissatisfaction<sup>5</sup>. Moreover, it should be considered together with doctors' professional  
27  
28 279 title and department. Doctors with junior titles may undertake more life stress from supporting  
29  
30 280 their families, houses, and children. Therefore, paying more attention to doctors with heavier life  
31  
32 281 and working stress would help them get more satisfied with their job. Doctors in different  
33  
34 282 departments may also enjoy various extensions of job satisfaction<sup>20</sup>, indicating hospital  
35  
36 283 administrators could improve working conditions to various degrees according to departments  
37  
38 284 where doctors were.

39  
40  
41  
42 285 There are two limitations to this study. First, due to unwillingness to answer questions about  
43  
44 286 some personal information, age distribution and income were not obtained, which made it  
45  
46 287 impossible to explore the effects on job satisfaction. Second, this survey was only conducted in 11  
47  
48 288 tertiary A public hospitals of Shanghai, which could only represent the condition of doctors in  
49  
50 289 such hospitals. Future studies will enlarge example size and explore more influencing factors.  
51  
52  
53  
54  
55  
56  
57  
58  
59  
60



1  
2  
3  
4 290 **Conclusions**

5  
6 291 In conclusion, nearly 65% of doctors were not satisfied with their job in Shanghai, China,  
7  
8 292 which was mainly influenced by their professional title, patient composition, working and life  
9  
10 293 stress, working hours, patients' respect, and department. To address this problem, it should  
11  
12 294 encourage policy-makers and hospital administrators to establish the two-way referral system,  
13  
14 295 improve the current promotion and income system, shorten working hours, pay more attention to  
15  
16 296 young staff, and help doctors keep a balance between work and family.  
17  
18  
19

20  
21 297 **Funding statement**

22  
23 298 This work was supported by National Natural Science Foundation of China (71233008,  
24  
25 299 91224005, 71673291, 71303248), Important Disease Joint Research Project in Health Systems of  
26  
27 300 Shanghai (2013ZYJB0006), and Military Health Support Strategy and Key Technology Research  
28  
29 301 for Special Injuries in the South China Sea Region (AWS12J002).  
30  
31  
32

33 302 **Authors' contributions**

34  
35 303 This manuscript was jointly completed by JL, WY, TD, ML, and LZ. We must point out that  
36  
37 304 the four authors—JL, WY, TD, ML—contributed equally to this research. Here are the specific  
38  
39 305 efforts of each author. JL, WY, TD, ML made substantial contributions to conception and design,  
40  
41 306 analysis and interpretation of data, drafting the manuscript and revising it critically for important  
42  
43 307 intellectual content. LZ made substantial contributions to conception and design. All authors read  
44  
45 308 and gave final approval of the version to be published.  
46  
47  
48

49  
50 309 **Conflict of interest** None declared.

51  
52 310 **Data sharing statement** No additional data are available.  
53  
54

55 311  
56  
57

58 312  
59  
60

313 **References**

- 314 1. Cox KB. The effects of intrapersonal, intragroup, and inter group conflict on team  
315 performance effectiveness and work satisfaction. *Nursing Administration Quarterly*  
316 2003;**27**(2):153-63.
- 317 2. Tarcan M, Hikmet N, Schooley B, et al. An analysis of the relationship between burnout,  
318 socio-demographic and workplace factors and job satisfaction among emergency department  
319 health professionals. *Applied nursing research : ANR* 2017;**34**:40-47.
- 320 3. Zhou X, Pu J, Zhong X, et al. Burnout, psychological morbidity, job stress, and job  
321 satisfaction in Chinese neurologists. *Neurology* 2017;**88**(18):1727-35.
- 322 4. Mache S, Baresi L, Bernburg M, et al. Being prepared to work in Gynecology Medicine:  
323 evaluation of an intervention to promote junior gynecologists professionalism, mental health  
324 and job satisfaction. *Archives of gynecology and obstetrics* 2017;**295**(1):153-62.
- 325 5. Lu Y, Hu XM, Huang XL, et al. Job satisfaction and associated factors among healthcare  
326 staff: a cross-sectional study in Guangdong Province, China. *BMJ open* 2016;**6**(7):e011388.
- 327 6. Kvist T, Voutilainen A, Mantynen R, et al. The relationship between patients' perceptions of  
328 care quality and three factors: nursing staff job satisfaction, organizational characteristics and  
329 patient age. *BMC health services research* 2014;**14**:466.
- 330 7. Waddimba AC, Scribani M, Krupa N, et al. Frequency of satisfaction and dissatisfaction  
331 with practice among rural-based, group-employed physicians and non-physician practitioners.  
332 *BMC health services research* 2016;**16**(1):613.
- 333 8. Ritsema TS, Roberts KA. Job satisfaction among British physician associates. *Clinical*  
334 *medicine (London, England)* 2016;**16**(6):511-13.
- 335 9. Pantenburg B, Kitze K, Lupp M, et al. Job satisfaction of foreign-national physicians  
336 working in patient care: a cross-sectional study in Saxony, Germany. *Journal of occupational*  
337 *medicine and toxicology (London, England)* 2016;**11**(1):41.
- 338 10. Watts G. Nearly half of UK young doctors say stress levels rose last year. *BMJ*  
339 2013;**346**:1.
- 340 11. Tsuno K, Kawakami N, Inoue A, et al. Intragroup and intergroup conflict at work,  
341 psychological distress, and work engagement in a sample of employees in Japan. *Industrial*  
342 *health* 2009;**47**(6):640-8.
- 343 12. Frenk J, Chen L, Bhutta ZA, et al. [Health professionals for a new century: transforming  
344 education to strengthen health systems in an interdependent world]. *Revista peruana de*  
345 *medicina experimental y salud publica* 2011;**28**(2):337-41.
- 346 13. Paternotte E, van Dulmen S, van der Lee N, et al. Factors influencing intercultural  
347 doctor-patient communication: a realist review. *Patient education and counseling*  
348 2015;**98**(4):420-45.
- 349 14. Adler NE, Boyce T, Chesney M.A., Cohen S, Folkman S, Kahn R.L, et al. Socio economic  
350 status and health. The challenge of the gradient. *American Psychologist* 1994;**49**(1):15-24.
- 351 15. Siegle M. Solutions for the Violence at Medical Locations in USA. *CHINESE MEDICAL*  
352 *ETHICS* 2014;**27**(1):24-26.
- 353 16. Bergin E JH, Bergin R. Are doctors unhappy? A study of residents with an open interview  
354 form. *Qual Manag Health Care* 2004(**13**):8187.
- 355 17. Schmit Jongbloed LJ, Cohen-Schotanus J, Borleffs JCC, et al. Physician job satisfaction

- 1  
2  
3 356 related to actual and preferred job size. BMC medical education 2017;**17**(1):86.  
4 357 18. Chen Q, Yang L, Feng Q, et al. Job Satisfaction Analysis in Rural China: A Qualitative  
5 358 Study of Doctors in a Township Hospital. Scientifica 2017;**2017**:1964087.  
6  
7 359 19. Suarez M, Asenjo M, Sanchez M. Job satisfaction among emergency department staff.  
8 360 Australasian emergency nursing journal : AENJ 2017;**20**(1):31-36.  
9 361 20. de Oliveira Vasconcelos Filho P, de Souza MR, Elias PE, et al. Physicians' job satisfaction  
10 362 and motivation in a public academic hospital. Hum Resour Health 2016;**14**(1):75.  
11 363 21. Cienski J. Polish doctors fall out with new government over pay. The Lancet  
12 364 2007;**370**(9605):2088.  
13  
14 365 22. Holt E. Doctors in Eastern Europe prepare to walk out over pay. The Lancet  
15 366 2010;**376**(9737):221-22.  
16 367 23. Clark F. Doctors protest over Moscow health reforms. The Lancet 2014;**384**(9956):1736.  
17 368 24. Li XP, Hu HY, Shi HY. Rethinking on the policy of new medical reform: fruitful  
18 369 achievements or hidden gaps? Negative 2016;**37**(6):52-55.  
19 370 25. Zhou XM, Zhang XH, Hou N, et al. Analysis of compensation model and method in  
20 371 public general hospital after cancelling medicine addition. China Pharmacy  
21 372 2013;**24**(20):1825-27.  
22 373 26. Wang X, Xu C. Analysis of compensation methods for public hospitals after abolishing  
23 374 "pharmaceutical makeup" in new health care reform. The Chinese Health Service  
24 375 Management 2011(12):889-90.  
25 376 27. Ministry of Health P. Annual Health Statistics. 2012.  
26 377 28. Jingang A. Which future for doctors in China? Lancet 2013;**382**(9896):936-7.  
27 378 29. Qin X, Li L, Hsieh C-R. Too few doctors or too low wages? Labor supply of health care  
28 379 professionals in China. China Economic Review 2013;**24**(0):150-64.  
29 380 30. Nassar Junior AP, Azevedo LC. Factors associated with job and personal satisfaction in  
30 381 adult Brazilian intensivists. Revista Brasileira de terapia intensiva 2016;**28**(2):107-13.  
31 382 31. Starmer AJ, Frintner MP, Freed GL. Work-Life Balance, Burnout, and Satisfaction of  
32 383 Early Career Pediatricians. Pediatrics 2016;**137**(4).  
33 384 32. Caloyeras JP, Kanter M, Ives N, et al. Physician Professional Satisfaction and Area of  
34 385 Clinical Practice: Evidence from an Integrated Health Care Delivery System. The Permanente  
35 386 journal 2016;**20**(2):35-41.  
36 387 33. DXY. A survey of Chinese doctors' payment in 2012-2013 China Health Human  
37 388 Resources 2014(5):74-75.  
38 389 34. Goetz K, Jossen M, Szecsenyi J, et al. Job satisfaction of primary care physicians in  
39 390 Switzerland: an observational study. Family practice 2016;**33**(5):498-503.  
40 391 35. Krueger P, White D, Meaney C, et al. Predictors of job satisfaction among academic  
41 392 family medicine faculty: Findings from a faculty work-life and leadership survey. Canadian  
42 393 family physician Medecin de famille canadien 2017;**63**(3):e177-e85.  
43 394 36. Huang DM, Yin WQ, Yu QQ, et al. Comparison of work well-being among physicians in  
44 395 public hospitals before and after the new health reform. Chinese Journal of Hospital  
45 396 Administration 2015(3):217-20.  
46 397 37. Wu LX, Qi L, Li Y. Challenges faced by young Chinese doctors. Lancet (London,  
47 398 England) 2016;**387**(10028):1617.  
48 399 38. Yu W, Li M, Nong X, et al. Practices and attitudes of doctors and patients to downward

- 1  
2  
3 400 referral in Shanghai, China. *BMJ open* 2017;7(4):e012565.
- 4 401 39. Tong J, Zhu Y, Jie J, et al. Analysis of current situation of Chinese health care reform by  
5 402 studying emergency overcrowding in a typical Shanghai hospital. *The American Journal of*  
6 403 *Emergency Medicine* 2012;30(7):1313-18.
- 7 404 40. Villa S, Prenestini A, Giusepi I. A framework to analyze hospital-wide patient flow  
8 405 logistics: Evidence from an Italian comparative study. *Health Policy* 2014;115(2-3):196-205.
- 9 406 41. Jiang NJ, Yang LC, Liu JJ. Doctors' difficulties: a survey of Chinese doctors' living  
10 407 condition conducted by DXY and Life Times. Secondary Doctors' difficulties: a survey of  
11 408 Chinese doctors' living condition conducted by DXY and Life Times 2011.  
12 409 <http://wenku.baidu.com/view/d305d0ea19e8b8f67c1cb980.html>.
- 13 410 42. Zhou XL. A sudden death of a 26-year-old anesthesiologist in Zhejiang, China.  
14 411 Secondary A sudden death of a 26-year-old anesthesiologist in Zhejiang, China 2017.  
15 412 [http://news.youth.cn/sh/201706/t20170629\\_10193802.htm](http://news.youth.cn/sh/201706/t20170629_10193802.htm).
- 16 413 43. Chen ZL. "Four major problems" of the new health care reform: the major problems and  
17 414 countermeasures of health care reform. *Cai Zheng Jian Du* 2014(33):70-71.
- 18 415 44. McGowan YH, Niamh ; Burke, Helen ; Conry, Mary ; Morgan, Karen. Through doctors'  
19 416 eyes: A qualitative study of hospital doctor perspectives on their working conditions. *British*  
20 417 *Journal of Health Psychology* 2013;18(4):874-91.
- 21 418 45. Moreno-Jimenez B, Galvez-Herrer M, Rodriguez-Carvajal R, et al. A study of physicians'  
22 419 intention to quit: the role of burnout, commitment and difficult doctor-patient interactions.  
23 420 *Psicothema* 2012;24(2):263-70.
- 24 421 46. Kirkman MA, Watkins LD, Kitchen ND, et al. Early years neurosurgical training in the  
25 422 era of the European Working Time Directive. *Br J Neurosurg* 2013;27(5):586-9.
- 26 423 47. Lu Y, Hu XM, Huang XL, et al. The relationship between job satisfaction, work stress,  
27 424 work-family conflict, and turnover intention among physicians in Guangdong, China: a  
28 425 cross-sectional study. *BMJ open* 2017;7(5):e014894.
- 29 426 48. Lancet T. Violence against doctors: Why China? Why now? What next? *The Lancet*  
30 427 2014;383(9922):1013.
- 31 428 49. Li H, Yu W. Enhancing community system in China's recent health reform: An effort to  
32 429 improve equity in essential health care. *Health Policy* 2011;99(2):167-73.
- 33 430 50. Celedova L, Cevela R, Ptacek R, et al. P01-517 - Incidence of stress and depression in  
34 431 assessment medicine doctors in the Czech Republic. *European Psychiatry* 2011;26,  
35 432 **Supplement 1(0):521.**
- 36  
37  
38  
39  
40  
41  
42  
43  
44 433  
45  
46 434  
47  
48  
49  
50  
51  
52  
53  
54  
55  
56  
57  
58  
59  
60

435 **Table 1 Characteristics, working condition, and job satisfaction of participants**

|                                                | N (%)      | Job satisfaction         |                       | $\chi^2$ | P-value |
|------------------------------------------------|------------|--------------------------|-----------------------|----------|---------|
|                                                |            | Dissatisfaction<br>N (%) | Satisfaction<br>N (%) |          |         |
|                                                |            | 473 (64.8)               | 257 (35.2)            |          |         |
| <b>Gender</b>                                  |            |                          |                       | 1.448    | 0.229   |
| Male                                           | 407 (55.8) | 256 (62.9)               | 151 (37.1)            |          |         |
| Female                                         | 323 (44.2) | 217 (67.2)               | 106 (32.8)            |          |         |
| <b>Level of education</b>                      |            |                          |                       | 4.565    | 0.207   |
| Junior College degree                          | 11 (1.5)   | 4 (36.4)                 | 7 (63.6)              |          |         |
| Bachelor's degree                              | 203 (27.8) | 128 (63.1)               | 75 (36.9)             |          |         |
| Master's degree                                | 331 (45.3) | 218 (65.9)               | 113 (34.1)            |          |         |
| Doctor's degree                                | 185 (25.3) | 123 (66.5)               | 62 (33.5)             |          |         |
| <b>Position</b>                                |            |                          |                       | 6.800    | 0.147   |
| Leader of a hospital                           | 0 (0.0)    | 0 (0.0)                  | 0 (0.0)               |          |         |
| Leader of a department                         | 0 (0.0)    | 0 (0.0)                  | 0 (0.0)               |          |         |
| Director of a clinical department              | 51 (7.0)   | 32 (62.7)                | 19 (37.3)             |          |         |
| Director of medical a<br>technology department | 4 (0.5)    | 2 (50.0)                 | 2 (50.0)              |          |         |
| Director of pharmacy                           | 0 (0.0)    | 0 (0.0)                  | 0 (0.0)               |          |         |
| Doctor                                         | 637 (87.3) | 420 (65.9)               | 217 (34.1)            |          |         |
| Researcher                                     | 2 (0.3)    | 0 (0.0)                  | 2 (100.0)             |          |         |
| Unspecified staff                              | 36 (4.9)   | 19 (52.8)                | 17 (47.2)             |          |         |
| <b>Professional title</b>                      |            |                          |                       | 12.674   | 0.005   |
| Junior                                         | 249 (34.1) | 164 (65.9)               | 85 (34.1)             |          |         |
| Intermediate                                   | 302 (41.4) | 204 (67.5)               | 98 (32.5)             |          |         |
| Associate senior                               | 127 (17.4) | 83 (65.4)                | 44 (34.6)             |          |         |
| Senior                                         | 52 (7.1)   | 22 (42.3)                | 30 (57.7)             |          |         |
| <b>Department</b>                              |            |                          |                       | 8.213    | 0.042   |
| Others                                         | 84 (11.5)  | 51 (60.7)                | 33 (39.3)             |          |         |
| Medical technology                             | 46 (6.3)   | 25 (54.3)                | 21 (45.7)             |          |         |
| Internal medicine                              | 319 (43.7) | 224 (70.2)               | 95 (29.8)             |          |         |
| Surgery                                        | 281 (38.5) | 173 (61.6)               | 108 (38.4)            |          |         |
| <b>Working hours per week (hours)</b>          |            |                          |                       | 26.334   | 0.015   |
| ≤40                                            | 90 (12.3)  | 44 (48.9)                | 46 (51.1)             |          |         |
| 41-45                                          | 57 (7.8)   | 33 (57.9)                | 24 (42.1)             |          |         |
| 46-50                                          | 176 (24.1) | 119 (67.6)               | 57 (32.4)             |          |         |
| 51-55                                          | 44 (6.0)   | 33 (75.0)                | 11 (25.0)             |          |         |
| 56-60                                          | 178 (24.4) | 124 (69.7)               | 54 (30.3)             |          |         |
| 61-65                                          | 49 (6.7)   | 34 (69.4)                | 15 (30.6)             |          |         |
| 66-70                                          | 55 (7.5)   | 32 (58.2)                | 23 (41.8)             |          |         |
| 71-75                                          | 17 (2.3)   | 14 (82.4)                | 3 (17.6)              |          |         |
| 76-80                                          | 32 (4.4)   | 22 (68.8)                | 10 (31.3)             |          |         |

|                                                                                   |            |            |            |        |         |
|-----------------------------------------------------------------------------------|------------|------------|------------|--------|---------|
| 81-85                                                                             | 7 (1.0)    | 6 (85.7)   | 1 (14.3)   |        |         |
| 86-90                                                                             | 5 (0.7)    | 1 (20.0)   | 4 (80.0)   |        |         |
| 91-95                                                                             | 2 (0.3)    | 1 (50.0)   | 1 (50.0)   |        |         |
| 96-100                                                                            | 13 (1.8)   | 7 (53.8)   | 6 (46.2)   |        |         |
| ≥101                                                                              | 5 (0.7)    | 3 (60.0)   | 2 (40.0)   |        |         |
| <b>Whether the work within working hours can reach the hospital requirement</b>   |            |            |            | 13.846 | 0.008   |
| Completely can                                                                    | 253 (34.7) | 161 (63.6) | 92 (36.4)  |        |         |
| Mostly can                                                                        | 367 (50.3) | 224 (61.0) | 143 (39.0) |        |         |
| Mostly cannot                                                                     | 68 (9.3)   | 55 (80.9)  | 13 (19.1)  |        |         |
| Completely cannot                                                                 | 20 (2.7)   | 15 (75.0)  | 5 (25.0)   |        |         |
| Hard to say                                                                       | 22 (3.0)   | 18 (81.8)  | 4 (18.2)   |        |         |
| <b>Life stress</b>                                                                |            |            |            | 20.524 | <0.0001 |
| Very light                                                                        | 2 (0.3)    | 2 (100.0)  | 0 (0.0)    |        |         |
| Relatively light                                                                  | 6 (0.8)    | 3 (50.0)   | 3 (50.0)   |        |         |
| Moderate                                                                          | 153 (21.0) | 80 (52.3)  | 73 (47.7)  |        |         |
| Relatively great                                                                  | 362 (49.6) | 234 (64.6) | 128 (35.4) |        |         |
| Very great                                                                        | 207 (28.4) | 154 (74.4) | 53 (25.6)  |        |         |
| <b>Working stress</b>                                                             |            |            |            |        |         |
| Very light                                                                        | 0 (0.0)    | 0 (0.0)    | 0 (0.0)    | 39.135 | <0.0001 |
| Relatively light                                                                  | 3 (0.4)    | 0 (0.0)    | 3 (100.0)  |        |         |
| Moderate                                                                          | 88 (12.1)  | 37 (42.0)  | 51 (58.0)  |        |         |
| Relatively great                                                                  | 358 (49.0) | 225 (62.8) | 133 (37.2) |        |         |
| Very great                                                                        | 281 (38.5) | 211 (75.1) | 70 (24.9)  |        |         |
| <b>Whether current working stress increased compared to that in the past year</b> |            |            |            | 20.777 | <0.0001 |
| Yes                                                                               | 576 (78.9) | 392 (68.1) | 184 (31.9) |        |         |
| No                                                                                | 73 (10.0)  | 30 (41.1)  | 43 (58.9)  |        |         |
| Hard to say                                                                       | 81 (11.1)  | 51 (63.0)  | 30 (37.0)  |        |         |
| <b>Reflection of great working stress</b>                                         |            |            |            |        |         |
| Work intensity                                                                    | 480 (65.8) | 341 (71.0) | 139 (29.0) | 23.979 | <0.0001 |
| Long working time                                                                 | 421 (57.7) | 303 (72.0) | 118 (28.0) | 22.459 | <0.0001 |
| High expectations of patients                                                     | 341 (46.7) | 230 (67.4) | 111 (32.6) | 1.976  | 0.160   |
| High risks of the job                                                             | 403 (55.2) | 291 (72.2) | 112 (27.8) | 21.678 | <0.0001 |
| Poor patient-doctor relationship                                                  | 396 (54.2) | 277 (69.9) | 119 (30.1) | 10.083 | 0.001   |
| Poor colleague relationship                                                       | 42 (5.8)   | 33 (78.6)  | 9 (21.4)   | 3.708  | 0.054   |
| Fierce competition of professional title promotion                                | 310 (42.5) | 223 (71.9) | 87 (28.1)  | 12.045 | 0.001   |
| Bad social evaluation                                                             | 205 (28.1) | 162 (79.0) | 43 (21.0)  | 25.303 | <0.0001 |
| Misunderstanding from the society                                                 | 302 (41.8) | 208 (68.2) | 97 (31.8)  | 2.658  | 0.103   |
| <b>Whether departments once organized a community health lecture</b>              |            |            |            | 1.542  | 0.214   |
| No                                                                                | 465 (63.7) | 309 (66.5) | 156 (33.5) |        |         |
| Yes                                                                               | 265 (36.3) | 164 (61.9) | 101 (38.1) |        |         |
| <b>Whether departments once participated in a volunteer medical consultation</b>  |            |            |            | 0.213  | 0.644   |
| No                                                                                | 318 (43.6) | 209 (65.7) | 109 (34.3) |        |         |

|    |                                                                                                  |            |            |            |        |         |
|----|--------------------------------------------------------------------------------------------------|------------|------------|------------|--------|---------|
| 1  |                                                                                                  |            |            |            |        |         |
| 2  |                                                                                                  |            |            |            |        |         |
| 3  | Yes                                                                                              | 412 (56.4) | 264 (64.1) | 148 (35.9) |        |         |
| 4  | <b>Which type of patients should seek medical treatment in tertiary A public hospitals (MCQ)</b> |            |            |            |        |         |
| 5  | All types                                                                                        | 301 (41.2) | 182 (60.5) | 119 (39.5) | 4.209  | 0.040   |
| 6  | Chronic diseases                                                                                 | 165 (22.6) | 98 (59.4)  | 67 (40.6)  | 2.726  | 0.099   |
| 7  | Rare diseases                                                                                    | 389 (53.3) | 258 (66.3) | 131 (33.7) | 0.854  | 0.355   |
| 8  | Common diseases                                                                                  | 171 (23.4) | 105 (61.4) | 66 (38.6)  | 1.126  | 0.289   |
| 9  | Acute diseases                                                                                   | 321 (44.0) | 211 (65.7) | 110 (34.3) | 0.221  | 0.638   |
| 10 | Difficultly-diagnosed diseases                                                                   | 484 (66.3) | 321 (66.3) | 163 (33.7) | 1.470  | 0.225   |
| 11 | Rehabilitation                                                                                   | 71 (9.7)   | 45 (63.4)  | 26 (36.6)  | 0.069  | 0.793   |
| 12 | Serious diseases                                                                                 | 453 (62.1) | 294 (64.9) | 159 (35.1) | 0.006  | 0.939   |
| 13 |                                                                                                  |            |            |            |        |         |
| 14 |                                                                                                  |            |            |            |        |         |
| 15 | <b>Which type of patients doctors met in most working hours (MCQ*)</b>                           |            |            |            |        |         |
| 16 | Chronic diseases                                                                                 | 496 (67.9) | 321 (64.7) | 175 (35.3) | 0.004  | 0.950   |
| 17 | Rare diseases                                                                                    | 82 (11.2)  | 46 (56.1)  | 36 (43.9)  | 3.063  | 0.080   |
| 18 | Common diseases                                                                                  | 606 (83.0) | 399 (65.8) | 207 (34.2) | 1.715  | 0.190   |
| 19 | Acute diseases                                                                                   | 140 (19.2) | 87 (62.1)  | 53 (37.9)  | 0.534  | 0.465   |
| 20 | Difficultly-diagnosed diseases                                                                   | 190 (26.0) | 114 (60.1) | 76 (40.0)  | 2.588  | 0.108   |
| 21 | Rehabilitation                                                                                   | 81 (11.1)  | 52 (64.2)  | 29 (35.8)  | 0.014  | 0.905   |
| 22 | Serious diseases                                                                                 | 150 (20.5) | 87 (58.0)  | 63 (42.0)  | 3.821  | 0.051   |
| 23 | Prescribing medicine                                                                             | 301 (41.2) | 221 (73.4) | 80 (26.6)  | 16.713 | <0.0001 |
| 24 |                                                                                                  |            |            |            |        |         |
| 25 |                                                                                                  |            |            |            |        |         |
| 26 | <b>Whether doctors were satisfied with types of patients they met</b>                            |            |            |            | 49.153 | <0.0001 |
| 27 | Satisfied                                                                                        | 374 (51.2) | 198 (52.9) | 176 (47.1) |        |         |
| 28 | Not satisfied                                                                                    | 241 (33.0) | 192 (79.7) | 49 (20.3)  |        |         |
| 29 | Hard to say                                                                                      | 115 (15.8) | 83 (72.2)  | 32 (27.8)  |        |         |
| 30 |                                                                                                  |            |            |            |        |         |
| 31 | <b>Which type of patients doctors expect (MCQ*)</b>                                              |            |            |            |        |         |
| 32 | Chronic diseases                                                                                 | 267 (36.6) | 162 (60.7) | 105 (39.3) | 3.133  | 0.077   |
| 33 | Rare diseases                                                                                    | 338 (46.3) | 224 (66.3) | 114 (33.7) | 0.603  | 0.438   |
| 34 | Common diseases                                                                                  | 380 (52.1) | 228 (60.0) | 152 (40.0) | 7.987  | 0.005   |
| 35 | Acute diseases                                                                                   | 196 (26.8) | 143 (73.0) | 53 (27.0)  | 7.830  | 0.005   |
| 36 | Difficultly-diagnosed diseases                                                                   | 460 (63.0) | 305 (66.3) | 155 (33.7) | 1.243  | 0.265   |
| 37 | Rehabilitation                                                                                   | 69 (9.5)   | 43 (62.3)  | 26 (37.7)  | 0.205  | 0.651   |
| 38 | Serious diseases                                                                                 | 348 (47.7) | 238 (68.4) | 110 (31.6) | 3.770  | 0.052   |
| 39 | Prescribing medicine                                                                             | 62 (8.5)   | 44 (71.0)  | 18 (29.0)  | 1.132  | 0.287   |
| 40 |                                                                                                  |            |            |            |        |         |
| 41 |                                                                                                  |            |            |            |        |         |
| 42 | <b>Which type of patients should seek medical treatment in community health system (MCQ*)</b>    |            |            |            |        |         |
| 43 | Chronic diseases                                                                                 | 487 (66.7) | 322 (66.1) | 165 (33.9) | 1.125  | 0.289   |
| 44 | Rare diseases                                                                                    | 27 (3.7)   | 15 (55.6)  | 12 (44.4)  | 1.049  | 0.306   |
| 45 | Common diseases                                                                                  | 556 (76.2) | 360 (64.7) | 196 (35.3) | 0.002  | 0.963   |
| 46 | Acute diseases                                                                                   | 33 (4.5)   | 19 (57.6)  | 14 (42.4)  | 0.790  | 0.374   |
| 47 | Difficultly-diagnosed diseases                                                                   | 30 (4.1)   | 23 (76.7)  | 7 (23.3)   | 1.933  | 0.164   |
| 48 | Rehabilitation                                                                                   | 368 (50.4) | 251 (68.2) | 117 (31.8) | 3.787  | 0.052   |
| 49 | Serious diseases                                                                                 | 23 (3.2)   | 15 (65.2)  | 8 (34.8)   | 0.002  | 0.966   |
| 50 | Prescribing medicine                                                                             | 518 (71.0) | 343 (66.2) | 175 (33.8) | 1.580  | 0.209   |
| 51 |                                                                                                  |            |            |            |        |         |
| 52 |                                                                                                  |            |            |            |        |         |
| 53 | <b>Evaluation of medical expenses of patients in tertiary A hospitals</b>                        |            |            |            | 8.352  | 0.079   |
| 54 | Very cheap                                                                                       | 28 (3.8)   | 24 (85.7)  | 4 (14.3)   |        |         |
| 55 | Relatively cheap                                                                                 | 35 (4.8)   | 26 (74.3)  | 9 (25.7)   |        |         |
| 56 |                                                                                                  |            |            |            |        |         |
| 57 |                                                                                                  |            |            |            |        |         |
| 58 |                                                                                                  |            |            |            |        |         |
| 59 |                                                                                                  |            |            |            |        |         |
| 60 |                                                                                                  |            |            |            |        |         |

|                                                          |            |            |            |        |         |
|----------------------------------------------------------|------------|------------|------------|--------|---------|
| Moderate                                                 | 284 (38.9) | 176 (62.0) | 108 (38.0) |        |         |
| Relatively expensive                                     | 334 (45.8) | 213 (63.8) | 121 (36.2) |        |         |
| Very expensive                                           | 49 (6.7)   | 34 (69.4)  | 15 (30.6)  |        |         |
| <b>Evaluation of the extent patients respect doctors</b> |            |            |            | 44.764 | <0.0001 |
| Completely not respect                                   | 13 (1.8)   | 11 (84.6)  | 2 (15.4)   |        |         |
| Relatively not respect                                   | 43 (5.9)   | 36 (83.7)  | 7 (16.3)   |        |         |
| Moderate                                                 | 354 (48.5) | 260 (73.4) | 94 (26.6)  |        |         |
| Relatively respect                                       | 284 (38.9) | 145 (51.1) | 139 (48.9) |        |         |
| Completely respect                                       | 36 (4.9)   | 21 (58.3)  | 15 (41.7)  |        |         |

436 Asterisk (\*): MCQ means multiple-choice question. Participants can choose more than one option

437 in this question.

438

For peer review only



439 **Table 2 Logistic regression analysis of job satisfaction and its influencing factors**

| Parameter                                                                       | Estimate | P-value | OR    | 95% Wald confidence interval |             |
|---------------------------------------------------------------------------------|----------|---------|-------|------------------------------|-------------|
|                                                                                 |          |         |       | Lower limit                  | Upper limit |
| <b>Professional title</b>                                                       |          |         |       |                              |             |
| Junior                                                                          | -0.867   | 0.024   | 0.420 | 0.198                        | 0.891       |
| Intermediate                                                                    | -0.651   | 0.079   | 0.522 | 0.252                        | 1.079       |
| Associate senior                                                                | -0.634   | 0.112   | 0.530 | 0.242                        | 1.160       |
| Senior                                                                          | Ref      | Ref     | Ref   | Ref                          | Ref         |
| <b>Department</b>                                                               |          |         |       |                              |             |
| Others                                                                          | 0.039    | 0.901   | 1.040 | 0.563                        | 1.918       |
| Medical technology                                                              | -0.114   | 0.778   | 0.893 | 0.405                        | 1.967       |
| Internal medicine                                                               | -0.259   | 0.221   | 0.772 | 0.510                        | 1.168       |
| Surgery                                                                         | Ref      | Ref     | Ref   | Ref                          | Ref         |
| <b>Working hours per week (hours)</b>                                           |          |         |       |                              |             |
| ≤40                                                                             | -0.045   | 0.970   | 0.956 | 0.089                        | 10.236      |
| 41-45                                                                           | -0.527   | 0.667   | 0.590 | 0.053                        | 6.527       |
| 46-50                                                                           | -0.293   | 0.806   | 0.746 | 0.072                        | 7.758       |
| 51-55                                                                           | -0.573   | 0.646   | 0.564 | 0.049                        | 6.473       |
| 56-60                                                                           | -0.572   | 0.631   | 0.564 | 0.055                        | 5.819       |
| 61-65                                                                           | -0.179   | 0.883   | 0.836 | 0.076                        | 9.181       |
| 66-70                                                                           | -0.110   | 0.928   | 0.896 | 0.083                        | 9.716       |
| 71-75                                                                           | -1.188   | 0.384   | 0.305 | 0.021                        | 4.420       |
| 76-80                                                                           | -0.502   | 0.687   | 0.606 | 0.053                        | 6.939       |
| 81-85                                                                           | -0.617   | 0.710   | 0.540 | 0.021                        | 13.966      |
| 86-90                                                                           | 2.293    | 0.185   | 9.905 | 0.335                        | 293.111     |
| 91-95                                                                           | 0.713    | 0.721   | 2.041 | 0.040                        | 103.175     |
| 96-100                                                                          | 0.107    | 0.936   | 1.113 | 0.081                        | 15.218      |
| ≥101                                                                            | Ref      | Ref     | Ref   | Ref                          | Ref         |
| <b>Whether the work within working hours can reach the hospital requirement</b> |          |         |       |                              |             |
| Completely can                                                                  | 0.523    | 0.399   | 1.687 | 0.501                        | 5.683       |
| Mostly can                                                                      | 0.875    | 0.155   | 2.400 | 0.719                        | 8.015       |
| Mostly cannot                                                                   | -0.129   | 0.853   | 0.879 | 0.224                        | 3.452       |
| Completely cannot                                                               | 0.403    | 0.648   | 1.496 | 0.266                        | 8.422       |
| Hard to say                                                                     | Ref      | Ref     | Ref   | Ref                          | Ref         |
| <b>Life stress</b>                                                              |          |         |       |                              |             |
| Very light                                                                      | -20.905  | 0.999   | —     | —                            | —           |
| Relatively light                                                                | -20.035  | 0.999   | —     | —                            | —           |
| Moderate                                                                        | 0.119    | 0.725   | 1.127 | 0.579                        | 2.191       |
| Relatively great                                                                | -0.145   | 0.608   | 0.865 | 0.497                        | 1.506       |
| Very great                                                                      | Ref      | Ref     | Ref   | Ref                          | Ref         |
| <b>Working stress</b>                                                           |          |         |       |                              |             |
| Very light                                                                      | —        | —       | —     | —                            | —           |
| Relatively light                                                                | 40.554   | 0.999   | —     | —                            | —           |
| Moderate                                                                        | 0.690    | 0.084   | 1.993 | 0.911                        | 4.361       |
| Relatively great                                                                | 0.051    | 0.843   | 1.053 | 0.633                        | 1.751       |

|                                                                                                            |        |       |       |       |       |
|------------------------------------------------------------------------------------------------------------|--------|-------|-------|-------|-------|
| Very great                                                                                                 | Ref    | Ref   | Ref   | Ref   | Ref   |
| <b>Whether current working stress increased compared to that in the past year</b>                          |        |       |       |       |       |
| Yes                                                                                                        | 0.208  | 0.502 | 1.231 | 0.671 | 2.257 |
| No                                                                                                         | 0.785  | 0.045 | 2.192 | 1.017 | 4.724 |
| Hard to say                                                                                                | Ref    | Ref   | Ref   | Ref   | Ref   |
| <b>Whether work intensity was the reflection of great working stress</b>                                   |        |       |       |       |       |
| No                                                                                                         | 0.530  | 0.011 | 1.698 | 1.127 | 2.560 |
| Yes                                                                                                        | Ref    | Ref   | Ref   | Ref   | Ref   |
| <b>Whether long working time was the reflection of great working stress</b>                                |        |       |       |       |       |
| No                                                                                                         | 0.333  | 0.102 | 1.395 | 0.936 | 2.079 |
| Yes                                                                                                        | Ref    | Ref   | Ref   | Ref   | Ref   |
| <b>Whether high risks of the job was the reflection of great working stress</b>                            |        |       |       |       |       |
| No                                                                                                         | 0.248  | 0.206 | 1.282 | 0.873 | 1.882 |
| Yes                                                                                                        | Ref    | Ref   | Ref   | Ref   | Ref   |
| <b>Whether poor patient-doctor relationship was the reflection of great working stress</b>                 |        |       |       |       |       |
| No                                                                                                         | -0.129 | 0.515 | 0.879 | 0.597 | 1.296 |
| Yes                                                                                                        | Ref    | Ref   | Ref   | Ref   | Ref   |
| <b>Whether fierce competition of professional title was the reflection of great working stress</b>         |        |       |       |       |       |
| No                                                                                                         | 0.210  | 0.291 | 1.234 | 0.835 | 1.822 |
| Yes                                                                                                        | Ref    | Ref   | Ref   | Ref   | Ref   |
| <b>Whether bad social evaluation was the reflection of great working stress</b>                            |        |       |       |       |       |
| No                                                                                                         | 0.740  | 0.002 | 2.097 | 1.312 | 3.350 |
| Yes                                                                                                        | Ref    | Ref   | Ref   | Ref   | Ref   |
| <b>Whether patients with any kinds of diseases should seek medical treatment in tertiary A hospitals</b>   |        |       |       |       |       |
| No                                                                                                         | 0.041  | 0.831 | 1.042 | 0.713 | 1.523 |
| Yes                                                                                                        | Ref    | Ref   | Ref   | Ref   | Ref   |
| <b>Whether patients with requirement of prescribing medicine was the most doctors met in working hours</b> |        |       |       |       |       |
| No                                                                                                         | 0.157  | 0.450 | 1.170 | 0.779 | 1.757 |
| Yes                                                                                                        | Ref    | Ref   | Ref   | Ref   | Ref   |
| <b>Whether doctors were satisfied with types of patients they met</b>                                      |        |       |       |       |       |
| Satisfied                                                                                                  | 0.756  | 0.006 | 2.130 | 1.249 | 3.632 |
| Not satisfied                                                                                              | -0.330 | 0.288 | 0.719 | 0.391 | 1.322 |
| Hard to say                                                                                                | Ref    | Ref   | Ref   | Ref   | Ref   |
| <b>Whether patients with common diseases were the population doctors expected</b>                          |        |       |       |       |       |
| No                                                                                                         | -0.403 | 0.041 | 0.668 | 0.454 | 0.983 |
| Yes                                                                                                        | Ref    | Ref   | Ref   | Ref   | Ref   |
| <b>Whether patients with acute diseases were the population doctors expected</b>                           |        |       |       |       |       |
| No                                                                                                         | 0.356  | 0.104 | 1.428 | 0.929 | 2.195 |
| Yes                                                                                                        | Ref    | Ref   | Ref   | Ref   | Ref   |
| <b>Evaluation of the extent patients respect doctors</b>                                                   |        |       |       |       |       |
| Completely not respect                                                                                     | -1.007 | 0.319 | 0.365 | 0.050 | 2.648 |
| Relatively not respect                                                                                     | -0.589 | 0.354 | 0.555 | 0.160 | 1.929 |
| Moderate                                                                                                   | -0.364 | 0.414 | 0.695 | 0.290 | 1.666 |
| Relatively respect                                                                                         | 0.458  | 0.302 | 1.581 | 0.663 | 3.773 |
| Completely respect                                                                                         | Ref    | Ref   | Ref   | Ref   | Ref   |

440

STROBE Statement—Checklist of items that should be included in reports of *cross-sectional studies*

|                              | Item No | Recommendation                                                                                                                                                                                               | Reported on page # |
|------------------------------|---------|--------------------------------------------------------------------------------------------------------------------------------------------------------------------------------------------------------------|--------------------|
| <b>Title and abstract</b>    | 1       | (a) Indicate the study's design with a commonly used term in the title or the abstract                                                                                                                       | 1                  |
|                              |         | (b) Provide in the abstract an informative and balanced summary of what was done and what was found                                                                                                          | 2                  |
| <b>Introduction</b>          |         |                                                                                                                                                                                                              |                    |
| Background/rationale         | 2       | Explain the scientific background and rationale for the investigation being reported                                                                                                                         | 4-5                |
| Objectives                   | 3       | State specific objectives, including any prespecified hypotheses                                                                                                                                             | 5                  |
| <b>Methods</b>               |         |                                                                                                                                                                                                              |                    |
| Study design                 | 4       | Present key elements of study design early in the paper                                                                                                                                                      | 5-6                |
| Setting                      | 5       | Describe the setting, locations, and relevant dates, including periods of recruitment, exposure, follow-up, and data collection                                                                              | 5                  |
| Participants                 | 6       | (a) Give the eligibility criteria, and the sources and methods of selection of participants                                                                                                                  | 5                  |
| Variables                    | 7       | Clearly define all outcomes, exposures, predictors, potential confounders, and effect modifiers. Give diagnostic criteria, if applicable                                                                     | 6                  |
| Data sources/<br>measurement | 8*      | For each variable of interest, give sources of data and details of methods of assessment (measurement). Describe comparability of assessment methods if there is more than one group                         | 5-6                |
| Bias                         | 9       | Describe any efforts to address potential sources of bias                                                                                                                                                    | 5-6                |
| Study size                   | 10      | Explain how the study size was arrived at                                                                                                                                                                    | 5                  |
| Quantitative variables       | 11      | Explain how quantitative variables were handled in the analyses. If applicable, describe which groupings were chosen and why                                                                                 | 6                  |
| Statistical methods          | 12      | (a) Describe all statistical methods, including those used to control for confounding                                                                                                                        | 6-7                |
|                              |         | (b) Describe any methods used to examine subgroups and interactions                                                                                                                                          | 6-7                |
|                              |         | (c) Explain how missing data were addressed                                                                                                                                                                  | 5                  |
|                              |         | (d) If applicable, describe analytical methods taking account of sampling strategy                                                                                                                           | 6-7                |
|                              |         | (e) Describe any sensitivity analyses                                                                                                                                                                        | 6-7                |
| <b>Results</b>               |         |                                                                                                                                                                                                              |                    |
| Participants                 | 13*     | (a) Report numbers of individuals at each stage of study—eg numbers potentially eligible, examined for eligibility, confirmed eligible, included in the study, completing follow-up, and analysed            | 7                  |
|                              |         | (b) Give reasons for non-participation at each stage                                                                                                                                                         | 5                  |
|                              |         | (c) Consider use of a flow diagram                                                                                                                                                                           | 5                  |
| Descriptive data             | 14*     | (a) Give characteristics of study participants (eg demographic, clinical, social) and information on exposures and potential confounders                                                                     | 7-8                |
|                              |         | (b) Indicate number of participants with missing data for each variable of interest                                                                                                                          | 5                  |
| Outcome data                 | 15*     | Report numbers of outcome events or summary measures                                                                                                                                                         | 7                  |
| Main results                 | 16      | (a) Give unadjusted estimates and, if applicable, confounder-adjusted estimates and their precision (eg, 95% confidence interval). Make clear which confounders were adjusted for and why they were included | 8-10               |
|                              |         | (b) Report category boundaries when continuous variables were categorized                                                                                                                                    | 8-10               |
|                              |         | (c) If relevant, consider translating estimates of relative risk into absolute risk for                                                                                                                      | 8-10               |

a meaningful time period

|                          |    |                                                                                                                                                                            |       |
|--------------------------|----|----------------------------------------------------------------------------------------------------------------------------------------------------------------------------|-------|
| Other analyses           | 17 | Report other analyses done—eg analyses of subgroups and interactions, and sensitivity analyses                                                                             | 8-10  |
| <b>Discussion</b>        |    |                                                                                                                                                                            |       |
| Key results              | 18 | Summarise key results with reference to study objectives                                                                                                                   | 10    |
| Limitations              | 19 | Discuss limitations of the study, taking into account sources of potential bias or imprecision. Discuss both direction and magnitude of any potential bias                 | 14    |
| Interpretation           | 20 | Give a cautious overall interpretation of results considering objectives, limitations, multiplicity of analyses, results from similar studies, and other relevant evidence | 10-14 |
| Generalisability         | 21 | Discuss the generalisability (external validity) of the study results                                                                                                      | 10-14 |
| <b>Other information</b> |    |                                                                                                                                                                            |       |
| Funding                  | 22 | Give the source of funding and the role of the funders for the present study and, if applicable, for the original study on which the present article is based              | 15    |

\*Give information separately for exposed and unexposed groups.

**Note:** An Explanation and Elaboration article discusses each checklist item and gives methodological background and published examples of transparent reporting. The STROBE checklist is best used in conjunction with this article (freely available on the Web sites of PLoS Medicine at <http://www.plosmedicine.org/>, Annals of Internal Medicine at <http://www.annals.org/>, and Epidemiology at <http://www.epidem.com/>). Information on the STROBE Initiative is available at [www.strobe-statement.org](http://www.strobe-statement.org).

# BMJ Open

## A cross-sectional survey on job satisfaction and its associated factors among doctors in tertiary public hospitals in Shanghai, China

|                                 |                                                                                                                                                                                                                                                                                                                                                                                                                                                                                                                     |
|---------------------------------|---------------------------------------------------------------------------------------------------------------------------------------------------------------------------------------------------------------------------------------------------------------------------------------------------------------------------------------------------------------------------------------------------------------------------------------------------------------------------------------------------------------------|
| Journal:                        | <i>BMJ Open</i>                                                                                                                                                                                                                                                                                                                                                                                                                                                                                                     |
| Manuscript ID                   | bmjopen-2018-023823.R1                                                                                                                                                                                                                                                                                                                                                                                                                                                                                              |
| Article Type:                   | Research                                                                                                                                                                                                                                                                                                                                                                                                                                                                                                            |
| Date Submitted by the Author:   | 26-Sep-2018                                                                                                                                                                                                                                                                                                                                                                                                                                                                                                         |
| Complete List of Authors:       | Liu, Jiazhen; Shanghai Municipal Commission of Health and Family Planning, Shanghai Information Center for Health<br>Yu, Wenya; Second Military Medical University, College of Military Health Service Management<br>Ding, Tao; Second Military Medical University, College of Military Health Service Management<br>Li, Meina; Second Military Medical University, College of Military Health Service Management<br>Zhang, Lulu; Second Military Medical University, College of Military Health Service Management |
| <b>Primary Subject Heading</b>: | Health services research                                                                                                                                                                                                                                                                                                                                                                                                                                                                                            |
| Secondary Subject Heading:      | Health policy                                                                                                                                                                                                                                                                                                                                                                                                                                                                                                       |
| Keywords:                       | job satisfaction, doctor, hospital, China                                                                                                                                                                                                                                                                                                                                                                                                                                                                           |
|                                 |                                                                                                                                                                                                                                                                                                                                                                                                                                                                                                                     |

SCHOLARONE™  
Manuscripts

1  
2  
3  
4 1 **A cross-sectional survey on job satisfaction and its**  
5  
6 2 **associated factors among doctors in tertiary public hospitals**  
7  
8  
9 3 **in Shanghai, China**

10  
11 4 **Author list:** Jiazhen Liu<sup>\*,2</sup>, Wenya Yu<sup>\*,1</sup>, Tao Ding<sup>\*,1</sup>, Meina Li<sup>\*,1</sup>, Lulu Zhang<sup>\*\*,1</sup>

12  
13 5 \*These authors contributed equally to the study.

14  
15  
16 6 \*\*Corresponding author: Lulu Zhang

17  
18 7 E-mail: [zllrmit@aliyun.com](mailto:zllrmit@aliyun.com) (ZL)

19  
20 8 Tel: +86 021-81871421

21  
22 9 Fax: +86 021-81871436

23  
24  
25 10 Address: Department of Military Health Service Management, College of Military  
26  
27  
28 11 Health Service Management, Second Military Medical University, Shanghai,  
29  
30  
31 12 China, 200433

32  
33 13 1 Department of Military Health Service Management, College of Military Health  
34  
35 14 Service Management, Second Military Medical University, Shanghai, China, 200433

36  
37  
38 15 2 Shanghai Information Center for Health, Shanghai Municipal Commission of  
39  
40 16 Health and Family Planning, Shanghai, China, 200125

41  
42  
43 17 Jiazhen Liu (M. M), [liujiazhen@foxmail.com](mailto:liujiazhen@foxmail.com)

44  
45 18 Wenya Yu (Ph. D), [jsjyyuwenya@sina.cn](mailto:jsjyyuwenya@sina.cn)

46  
47 19 Tao Ding (M. M), [kindy292003@163.com](mailto:kindy292003@163.com)

48  
49 20 Meina Li (Ph. D), [meinali53@sina.cn](mailto:meinali53@sina.cn)

50  
51 21 Lulu Zhang (Ph. D), [zllrmit@aliyun.com](mailto:zllrmit@aliyun.com)

52  
53  
54  
55 22

1  
2  
3  
4  
5  
6  
7  
8  
9  
10  
11  
12  
13  
14  
15  
16  
17  
18  
19  
20  
21  
22  
23 **Abstract**

24 **Objectives:** Doctors in public hospitals of China face considerable pressure and  
25 excessive workloads, which are likely to predispose to job dissatisfaction. We  
26 explored the job satisfaction of doctors and examined the influence of diverse  
27 sociodemographic characteristics.

28 **Design:** This was a cross-sectional study.

29 **Setting:** Eleven tertiary public hospitals in Shanghai, China.

30 **Participants:** The questionnaire was designed based on the 5th National Health  
31 Service General Research and the Minnesota Satisfaction Questionnaire.  
32 Questionnaires were administered to 897 doctors randomly (using random number  
33 tables), and 730 were returned completed (response rate = 81.4%). Doctors who  
34 volunteered and provided informed, written consent participated.

35 **Primary outcome measures:** The dependent variable was doctors' job satisfaction.

36 **Results:** Statistical analyses were conducted using SPSS and SAS. Overall, 64.8% of  
37 participants were dissatisfied with their jobs. Factors statistically significant to  
38 doctors' job satisfaction in the univariate analysis were entered into the logistic  
39 regression analysis, including doctors' professional title, department, work hours,  
40 work requirements (reflected as the number of patients they diagnosed and treated  
41 monthly), life and work stress, and types of patients that doctors treated or expected to  
42 treat. Logistic regression analysis results suggested that doctors' job satisfaction was  
43 related to their professional title, types of patients that doctors treated or expected to  
44 treat, as well as their work stress.

1  
2  
3  
4  
5  
6  
7  
8  
9  
10  
11  
12  
13  
14  
15  
16  
17  
18  
19  
20  
21  
22  
23  
24  
25  
26  
27  
28  
29  
30  
31  
32  
33  
34  
35  
36  
37  
38  
39  
40  
41  
42  
43  
44  
45  
46  
47  
48  
49  
50  
51  
52  
53  
54  
55  
56  
57  
58  
59  
60

45 **Conclusions:** There is an urgent need for public hospitals in China to establish a more  
46 reasonable promotion and management system for doctors, encourage patients to  
47 accept two-way referral, pay more attention to less-experienced staff, and help doctors  
48 release their work stress.

49 **Keywords:** job satisfaction; doctor; hospital; China

50

For peer review only



1  
2  
3  
4  
5  
6  
7  
8  
9  
10  
11  
12  
13  
14  
15  
16  
17  
18  
19  
20  
21  
22  
23  
24  
25  
26  
27  
28  
29  
30  
31  
32  
33  
34  
35  
36  
37  
38  
39  
40  
41  
42  
43  
44  
45  
46  
47  
48  
49  
50  
51  
52  
53  
54  
55  
56  
57  
58  
59

## 51 **Strengths and limitations of this study**

52 ■ We tried to improve doctors' job satisfaction and promote becoming a doctor in  
53 China.

54 ■ We provided a valuable reference for others interested in doctors' job satisfaction  
55 and working conditions in China.

56 ■ We provided quantitative data concerning doctors' working conditions.

57 ■ Our research findings are only representative of doctors in tertiary A public  
58 hospitals in China.

59

## 60 **Background**

61 Work-related problems of doctors are growing global concerns, especially  
62 doctors' job satisfaction<sup>1</sup>. Job satisfaction comprises issues such as burnout<sup>2,3</sup>, mental  
63 health<sup>4</sup>, work-family balance<sup>5</sup>, and quality of care<sup>6</sup>. Several studies have explored job  
64 satisfaction, including its diverse dimensions<sup>2</sup>; its influencing factors<sup>7</sup>; and  
65 interrelationships between burnout<sup>3</sup>, work stress<sup>8,9</sup>, mental health<sup>4</sup> and job satisfaction  
66 among doctors, nurses, and medical staff in diverse departments, regions and  
67 countries<sup>10</sup>.

68 Scholars from different countries such as the United States, the United Kingdom,  
69 and Germany have tried to deal with problems concerning job dissatisfaction<sup>11-13</sup>. For  
70 example, scholars in the United States noted that workload, work meaningfulness,  
71 relational needs, tolerance, and risk-taking attitudes were associated with job  
72 satisfaction<sup>11</sup>. Researchers in the United Kingdom indicated that whether physicians  
73 can fully use their training was a key factor influencing their job satisfaction<sup>12</sup>.  
74 Scholars in Germany paid more attention to foreign-national physicians and suggested  
75 that human relations and social status were related to their job satisfaction<sup>13</sup>. In  
76 addition, job characteristics<sup>9,10,14-18</sup> and personal factors<sup>19-22</sup> have been found to affect  
77 job satisfaction.

78 Further, doctors themselves pay great attention to job satisfaction. Doctors  
79 worldwide fight for their own rights to improve job satisfaction, working condition,  
80 professional accomplishments, and career development. For example, doctors in  
81 Poland<sup>23</sup> and the Czech Republic<sup>24</sup> have had conflicts with their respective

1  
2  
3  
4 82 governments regarding overwork. Fortunately, doctors in many countries and regions  
5  
6 83 have succeeded in this fight, which ultimately improve their job satisfaction, work  
7  
8 84 efficiency, and care quality<sup>25</sup>.

9  
10  
11 85 Moreover, healthcare reform is a vital component of doctors' job satisfaction and  
12  
13 86 working conditions, and China is no exception. In Chinese healthcare reform, the  
14  
15 87 government pays considerable attention to reducing medication costs<sup>26</sup>. Hospitals are  
16  
17 88 expected to sell drugs to patients without adding a 15% profit, which may decrease  
18  
19 89 the hospital's income<sup>27</sup>. Other policies such as controlling medication fees per visit  
20  
21 90 and the cost of medical insurance have reduced doctors' decision-making power.  
22  
23 91 Consequently, hospital management may force doctors to work overtime to augment  
24  
25 92 or maintain hospital income if there is not enough government compensation<sup>28</sup>.  
26  
27 93 Moreover, doctors had to change their behaviors to fulfil hospital income indicators.  
28  
29 94 In China, over 4.5 million doctors are under increasing pressures to see more patients,  
30  
31 95 meet increased administrative requirements, and keep up with government  
32  
33 96 regulations<sup>29</sup>. Moreover, the lives of doctors are threatened in hospitals owing to poor  
34  
35 97 doctor-patient relationships<sup>30</sup>. As doctors are overworked, underpaid, and under  
36  
37 98 threat, some scholars have wondered who will be the next doctors in China<sup>31</sup>.

38  
39  
40 99 Therefore, the main purpose of this study was to promote the development of  
41  
42 100 more doctors in China and to enhance the condition of doctors. We determined what  
43  
44 101 factors affect doctors' job satisfaction in China and provide practical  
45  
46 102 recommendations to improve Chinese doctors' job satisfaction and working  
47  
48 103 conditions.  
49  
50  
51  
52  
53  
54  
55  
56  
57  
58  
59  
60

1  
2  
3  
4 104 **Methods**

5  
6 105 ***Participants***

7  
8 106 Between June 18 and September 27, 2013, a cross-sectional survey about  
9  
10 107 doctors' job satisfaction was conducted in Shanghai, China. Using random number  
11  
12 108 tables, we selected eleven tertiary public hospitals in Shanghai. Questionnaires were  
13  
14 109 administered to 1,000 doctors in these hospitals. All participants were also chosen  
15  
16 110 through random number tables, which were based on doctors' job number. Among the  
17  
18 111 1,000 participants, 897 were willing to participate, and 103 doctors were excluded  
19  
20 112 from this study because of their unwillingness. Of these, 730 were returned complete  
21  
22 113 (valid response rate = 81.4%). Doctors who volunteered and provided informed,  
23  
24 114 written consent participated. Researchers addressed doctors' queries and doubts  
25  
26 115 regarding the questionnaire as needed.  
27  
28  
29  
30  
31

32  
33 116 ***Instrument Development and Validation***

34  
35 117 The questionnaire was designed to examine doctors' working conditions and job  
36  
37 118 satisfaction. The questionnaire was designed based on the 5th National Health Service  
38  
39 119 General Research by the National Health and Family Planning Commission of the  
40  
41 120 People's Republic of China<sup>32</sup>. The general survey of the National Health Service  
42  
43 121 included job satisfaction of medical staff. It was a rigorously developed instrument,  
44  
45 122 based on the well-known and widely used Minnesota Satisfaction Questionnaire<sup>33</sup>. Its  
46  
47 123 content validity was verified through an expert panel discussion, which included 5  
48  
49 124 experts. To determine the internal consistency of this questionnaire, Cronbach's  $\alpha$   
50  
51 125 coefficient was calculated, which was 0.65. The Kaiser-Meyer-Olkin (KMO) test was  
52  
53  
54  
55  
56  
57  
58  
59  
60

1  
2  
3  
4 126 used as a screening test for factorability, which was 0.703 ( $p < 0.001$ ), indicating  
5  
6 127 acceptable validity.  
7

8 128 We collected data on sociodemographic variables such as age, sex, education  
9  
10 129 level, position, professional title, and department. Positions comprised directors,  
11  
12  
13 130 doctors, researchers, and unspecified staff. The unspecified staff were doctoral  
14  
15 131 students studying and working in these hospitals. There were some structured  
16  
17 132 questions about types of patients, including types of patients that doctors thought  
18  
19 133 should be treated in different healthcare institutions, doctors' satisfaction with the  
20  
21 134 types of patients they were treating, and what types of patients they expected to treat.  
22  
23 135 In addition, we asked about doctors' work time, life stress, work stress, and the  
24  
25 136 sources of work stress. The sources of work stress included work intensity, long  
26  
27 137 hours, patients' lofty expectations, job risks, poor patient-doctor relationships, poor  
28  
29 138 colleague relationships, competition for promotion, poor social evaluations, and  
30  
31 139 societal misunderstandings. Work intensity reflected the quantum of doctors' work,  
32  
33 140 which was mainly evaluated by the number of patients that doctors diagnosed and  
34  
35 141 treated (including surgery). Poor social evaluations reflected doctors' reputation  
36  
37 142 among patients, which considered doctors' professional abilities and personal  
38  
39 143 characteristics. We also asked doctors to rate their relationships with patients and  
40  
41 144 evaluate patients' medical expenses. Questions about working and life stress, and  
42  
43 145 doctor-patient relationships were measured using a 5-point Likert scale (*not*  
44  
45 146 *respectful*, *relatively not respectful*, *moderate*, *relatively respectful*, and *very*  
46  
47 147 *respectful*). The question about doctors' job satisfaction was the dependent variable.  
48  
49  
50  
51  
52  
53  
54  
55  
56  
57  
58  
59  
60

1  
2  
3  
4 148 ***Ethical Approval***  
5

6 149 The study protocol was approved by the ethics committee of the Second Military  
7  
8 150 Medical University. We protected participants' confidentiality.  
9

10  
11 151 ***Statistical Analyses***  
12

13 152 All data were entered into Epidata version 3.1 and analyzed using SPSS version  
14  
15 153 19.0 and SAS version 8.0. Sociodemographic data were described using frequencies  
16  
17 154 and percentages. Chi-square tests were employed to test the differences in job  
18  
19 155 satisfaction among doctors with different personal characteristics and other factors. A  
20  
21 156 logistic regression analysis was further used to verify the influence of factors on  
22  
23 157 doctors' job satisfaction. In the logistic regression analysis, the dependent variable  
24  
25 158 was doctors' job satisfaction. Independent variables entered into the logistic  
26  
27 159 regression analysis were based on the univariate analysis results that were all  
28  
29 160 significantly related to doctors' job satisfaction. We employed the stepwise selection  
30  
31 161 method, with inclusion criteria of 0.10 and exclusion criteria of 0.15. We also  
32  
33 162 employed a multicollinearity analysis to test collinearity. All tests were two-tailed and  
34  
35 163  $p < 0.05$  were considered significant.  
36  
37  
38  
39  
40  
41  
42

43 164 ***Patient and Public Involvement***  
44

45 165 We declare that no patients or public were involved in this study.  
46

47 166 **Results**  
48

49  
50 167 ***Characteristics, Working Condition, and Job Satisfaction***  
51

52 168 Overall, 64.8% of participants were dissatisfied with their jobs. Participants'  
53  
54 169 personal and job characteristics are shown in Table 1.  
55  
56  
57

1  
2  
3  
4  
5  
6  
7  
8  
9  
10  
11  
12  
13  
14  
15  
16  
17  
18  
19  
20  
21  
22  
23  
24  
25  
26  
27  
28  
29  
30  
31  
32  
33  
34  
35  
36  
37  
38  
39  
40  
41  
42  
43  
44  
45  
46  
47  
48  
49  
50  
51  
52  
53  
54  
55  
56  
57  
58  
59  
60

170 **Table 1. Participants' personal and job characteristics**

171 Working conditions and participants' job satisfaction are shown in Table 2. Most  
172 participants worked more than 40 hours a week. Most doctors can basically reach the  
173 hospitals' working requirements, which were reflected as the number of patients they  
174 diagnosed and treated monthly. Most reported work and life stress, which had  
175 increased in the last year, and was due to working intensity, long hours, and job risks.  
176 In addition, about one-third of doctors reported that their departments organized a  
177 community health lecture, and more than half of the departments participated in a  
178 volunteer medical consultation.

179 **Table 2. Working conditions and participants' job satisfaction**

180 Considering the types of patients, participants believed patients with  
181 difficult-to-diagnose diseases, serious diseases, and rare diseases should seek medical  
182 treatment in tertiary A hospitals. Most participants treated patients with common  
183 diseases, chronic diseases, and those seeking medicine; only about half of them were  
184 satisfied with the type of patients they met, which differed from who they were  
185 expecting to treat more often. Participants felt that many of these patients should seek  
186 medical treatment in the community health system especially patients with common  
187 and chronic diseases, and those seeking medicine. Further, about half of the  
188 participants thought patients' medical expenses were costly. Lastly, less than half of  
189 the participants felt respected by their patients (Table 3).

190 **Table 3. Patient-related issues and job satisfaction**

191 *Univariate Analysis of Job Satisfaction and its Influencing Factors*

1  
2  
3  
4 192 Using chi-square tests, the relationships between job satisfaction and other  
5  
6 193 factors were examined. Results indicated that several factors significantly influenced  
7  
8 194 doctors' job satisfaction (all p-values < 0.05), including the following: professional  
9  
10 195 title ( $\chi^2 = 12.674$ ), department ( $\chi^2 = 8.213$ ), work hours every week ( $\chi^2 = 16.935$ ),  
11  
12 196 whether the work within working hours met hospital requirements ( $\chi^2 = 13.846$ ), life  
13  
14 197 stress ( $\chi^2 = 20.524$ ), work stress ( $\chi^2 = 39.135$ ), whether current work stress increased  
15  
16 198 compared to that in the past year ( $\chi^2 = 20.777$ ), whether work intensity reflected work  
17  
18 199 stress ( $\chi^2 = 23.979$ ), whether working long hours reflected work stress ( $\chi^2 = 22.459$ ),  
19  
20 200 whether high jobs risks reflected work stress ( $\chi^2 = 21.678$ ), whether a poor  
21  
22 201 patient-doctor relationship reflected work stress ( $\chi^2 = 1.083$ ), whether competition for  
23  
24 202 promotion reflected work stress ( $\chi^2 = 12.045$ ), whether a poor social evaluation  
25  
26 203 reflected work stress ( $\chi^2 = 25.303$ ), whether patients should seek medical treatment in  
27  
28 204 tertiary A hospitals ( $\chi^2 = 4.209$ ), whether patients seeking medicine were the most  
29  
30 205 common type doctors treated ( $\chi^2 = 16.713$ ), whether doctors were satisfied with the  
31  
32 206 type of patients they treated ( $\chi^2 = 49.153$ ), whether patients with common diseases  
33  
34 207 were the population doctors expected ( $\chi^2 = 7.987$ ), whether patients with acute  
35  
36 208 diseases were the population doctors expected ( $\chi^2 = 7.830$ ), and the extent patients  
37  
38 209 respected doctors ( $\chi^2 = 44.764$ ) (Tables 1–3).

#### 210 ***Logistic Regression Analysis of Job Satisfaction and its Influencing Factors***

211 Variables that were significant to doctors' job satisfaction in the univariate  
212 analysis were included in the logistic regression analysis. To testify the collinearity  
213 among variables, a multicollinearity analysis was conducted. If tolerance is < 0.1 or



1  
2  
3  
4 214 the variance inflation factor (VIF) is  $> 5$ , collinearity exists. The multicollinearity  
5  
6 215 analysis indicated that collinearity did not exist (Supplementary Table 1).  
7

8 216 As shown in Table 4, 9 factors were entered into the logistic regression model.  
9  
10 217 Doctors who were satisfied with the types of patients they treated were more likely to  
11  
12  
13 218 be satisfied with their job compared to those who were not satisfied. Doctors who did  
14  
15  
16 219 not consider work intensity or poor social evaluation as reflective of their work stress  
17  
18 220 had more job satisfaction than did their counterparts. Doctors who felt moderate work  
19  
20 221 stress felt more satisfied with their job compared with those with great work stress.  
21  
22  
23 222 Doctors who had an expectation of treating patients with common diseases were more  
24  
25 223 satisfied with their jobs. Lastly, doctors with senior professional titles were more  
26  
27 224 satisfied with their job compared with doctors with lower-level titles.  
28  
29

30 225 **Table 4. Logistic regression analysis of job satisfaction and its influencing factors**  
31

32  
33 226 **Discussion**  
34

35 227 Doctors' job satisfaction was influenced by their professional title, patient  
36  
37 228 composition, and work stress. Some factors like department, work hours, patients'  
38  
39 229 respect, and life stress were also related to doctors' job satisfaction.  
40  
41

42 230 First, unlike some studies in other countries and regions, demographic  
43  
44 231 characteristics (e.g., sex and education background) were not influencing factors of  
45  
46 232 job satisfaction<sup>34 35</sup>. Only doctors' professional title played a role, which was  
47  
48 233 supported by other studies in China<sup>5</sup> and Canada<sup>36</sup>. Junior doctors were less satisfied  
49  
50 234 with their job, which may be attributed to many other factors. Because doctors'  
51  
52 235 income was related to their professional title<sup>37</sup>, the annual income of junior doctors  
53  
54  
55  
56  
57  
58  
59  
60

1  
2  
3  
4 236 was always lower than that of senior doctors. However, studies have proposed that  
5  
6 237 income positively influences doctors' job satisfaction<sup>2 5 17 38</sup>. In addition, a study in the  
7  
8 238 United Kingdom noted that young staff may fail to fully use their training, which  
9  
10  
11 239 could foster low satisfaction<sup>12</sup>. This can also be explained by opportunities to use  
12  
13 240 one's abilities and personal accomplishments during daily work, which were other  
14  
15 241 aspects impeding young staff from enjoying job satisfaction<sup>7</sup>. Moreover, junior  
16  
17 242 doctors in China face additional difficulties, including an unfair promotion system<sup>39</sup>.  
18  
19  
20 243 Furthermore, the new policy about specialist standardization training places more  
21  
22  
23 244 pressure on young staff, since it requires doctors to do an additional 2–4 years of  
24  
25 245 specialist training after completing 3 years of resident standardization training<sup>40</sup>.  
26  
27  
28 246 During this process, young doctors may become unsatisfied with their income and  
29  
30 247 their inability to support their families, which, in turn, promotes further job  
31  
32  
33 248 dissatisfaction.

34  
35 249 Second, patient composition was a significant factor influencing doctors' job  
36  
37  
38 250 satisfaction. Around 51.2% of the doctors were satisfied with the type of patients they  
39  
40 251 treated; however, 52.1% of the doctors mostly treated patients with common diseases  
41  
42  
43 252 every day. The low satisfaction seemed to reflect the gap between their expectations  
44  
45 253 and the reality. Because doctors in tertiary A public hospitals have the best  
46  
47  
48 254 professional abilities and hope to deal with the most difficult and complicated  
49  
50 255 diseases, they expect to treat patients with difficult-to-diagnose diseases. However,  
51  
52  
53 256 unlike the two-way referral system in many developed countries (e.g., the United  
54  
55 257 States), patients in China can choose the health institution they prefer<sup>41</sup>. This causes  
56  
57  
58  
59  
60

1  
2  
3 258 overcrowding in tertiary A public hospitals<sup>42</sup>, regardless of disease type. In fact, many  
4  
5  
6 259 patients with common, mild, or chronic diseases do not need to visit tertiary A public  
7  
8 260 hospitals, as this wastes high-quality medical resources. Under these circumstances,  
9  
10  
11 261 doctors who wish to solve difficult-to-diagnose cases feel disappointed and  
12  
13 262 dissatisfied with their work<sup>11</sup>. To solve this problem, hospital patient flow logistics  
14  
15 263 should be controlled<sup>43</sup>. Encouraging patients and doctors to accept two-way referral is  
16  
17  
18 264 vital; however, the level of trust between doctors and patients is also critical.  
19  
20  
21 265 Moreover, it should be noted that inadequate time spent treating difficult-to-diagnose  
22  
23 266 diseases has a negative effect on doctors' skill development, which can also cause  
24  
25 267 doctors' job dissatisfaction. Policymakers and hospital administrators should provide  
26  
27  
28 268 more opportunities to doctors expecting more difficult-to-diagnose patients, especially  
29  
30  
31 269 junior doctors.

32  
33 270 Third, work stress was related to job satisfaction, which supported a past study<sup>5</sup>.  
34  
35 271 However, we also found that relative work stress (i.e., comparing work stress to that  
36  
37 272 in the past year) more significantly predicted job satisfaction than did present work  
38  
39 273 stress. Doctors who felt greater relative work stress were more likely to be dissatisfied  
40  
41 274 with their job than their counterparts. In addition, the factors that doctors consider as  
42  
43 275 reflective of work stress, especially work intensity and social evaluation, require  
44  
45 276 attention. Doctors working in tertiary A public hospitals usually undertake many  
46  
47 277 clinical tasks; for example, because of the excess of patients, doctors have to diagnose  
48  
49 278 and treat them as fast as possible, which limits doctors' ability to take breaks<sup>44</sup>. What  
50  
51 279 is worse, several doctors died suddenly, possibly owing to the work intensity<sup>45</sup>.  
52  
53  
54  
55  
56  
57  
58  
59  
60

1  
2  
3  
4 280 Similar studies in other countries have also stated that work intensity negatively  
5  
6 281 affects job satisfaction<sup>11 34</sup>. Moreover, improving their social evaluation may improve  
7  
8 282 doctors' job satisfaction. At present, doctors in China do not have a good reputation  
9  
10  
11 283 because of some doctors pursuing personal economic interests by prescribing  
12  
13 284 unnecessary medicine or tests for patients<sup>46</sup>. It must be noted that there are many other  
14  
15  
16 285 doctors who do not resort to such unethical practices; however, they also become  
17  
18 286 victims of this stigmatization. Our society should maintain an objective and impartial  
19  
20  
21 287 attitude towards most doctors and supervise those with a poor reputation.  
22

23 288 Fourth, doctors' long work hours require attention. Working overtime has caused  
24  
25 289 low job satisfaction worldwide, such as in Britain<sup>47</sup>, Spain<sup>48</sup>, and Switzerland<sup>38</sup>. Our  
26  
27  
28 290 finding was similar. Although the European Working Time Directive ruled that junior  
29  
30 291 doctors should work no more than 48 hours per week<sup>49</sup>, this was unrealistic in China.  
31  
32  
33 292 Doctors have to work overtime, which often limits their family time and spare time.  
34  
35 293 However, a study proposed that work-private hours also play a key role in job  
36  
37 294 satisfaction<sup>9</sup>. In addition, in Chinese hospitals, doctors' payment is based on their  
38  
39  
40 295 performance, indicating that meeting job requirements may be more critical than  
41  
42  
43 296 working long hours. Moreover, performance is critical for promotion, especially for  
44  
45 297 junior doctors. Therefore, there is an urgent need to shorten doctors' weekly work  
46  
47  
48 298 hours and change the current promotion and income structure, which may promote  
49  
50 299 increased job satisfaction<sup>50</sup>.

51  
52 300 Fifth, it is reasonable to assume that if doctors feel respected by patients, they  
53  
54  
55 301 will be more satisfied with their work. Great respect from patients indicated their  
56  
57

1  
2  
3  
4 302 great recognition of doctors' professional abilities, personal characteristics, and good  
5  
6 303 reputation. All of these good aspects would accelerate doctors' enthusiasms of their  
7  
8 304 work, which then reflected as job satisfaction. However, due to the overcrowding of  
9  
10 305 patients in tertiary A public hospitals, patients spend a long time waiting to register,  
11  
12 306 pay, and fill prescriptions compared to a short time meeting doctors. This  
13  
14 307 unreasonable phenomenon has reduced patients' satisfaction and their respect for  
15  
16 308 doctors, and sometimes even results in violence against doctors<sup>51</sup>. Therefore, faced  
17  
18 309 with the poor patient-doctor relationship and violence from patients, it is more  
19  
20 310 possible to cause doctors' job dissatisfaction. To deal with this problem and enhance  
21  
22 311 the patient-doctor relationship, the number of patients visiting tertiary A public  
23  
24 312 hospitals should be decreased. If patients with common or minor diseases are willing  
25  
26 313 and encouraged to seek medical treatment in the community healthcare system,  
27  
28 314 doctors at tertiary A hospitals can spend more time diagnosing, treating, and  
29  
30 315 communicating with patients, while maintaining a positive and patient attitude<sup>52</sup>.

31  
32  
33  
34  
35  
36  
37  
38 316 Lastly, other life stress is also related to job satisfaction, and problems such as  
39  
40 317 depression and burnout require consideration<sup>53</sup>. Work-family conflict should also be  
41  
42 318 addressed to avoid job dissatisfaction<sup>5</sup>. Moreover, doctors' professional title and  
43  
44 319 department may factor into job satisfaction. Junior doctors may undertake more life  
45  
46 320 stress from supporting their families; therefore, these doctors may require additional  
47  
48 321 support. Doctors in different departments may also enjoy various extensions of job  
49  
50 322 satisfaction<sup>18</sup>, indicating hospital administrators could improve working conditions to  
51  
52 323 various degrees according to departments where doctors were.  
53  
54  
55  
56  
57  
58  
59  
60

1  
2  
3  
4 324 There are two limitations to this study. First, due to doctors' unwillingness to  
5  
6 325 answer questions about certain personal information, information on age distribution  
7  
8 326 and income were not obtained, which made it impossible to explore the effects of  
9  
10  
11 327 these on job satisfaction. Second, this survey was only conducted in eleven tertiary A  
12  
13 328 public hospitals in Shanghai, which limits generalizability. Future studies should  
14  
15  
16 329 include more hospitals and more possible factors.

### 18 330 **Conclusions**

19  
20 331 In conclusion, most doctors were not satisfied with their jobs in Shanghai, China,  
21  
22  
23 332 and this was mainly influenced by their professional title, patient composition, and  
24  
25  
26 333 work stress. To address this problem, policymakers and hospital administrators should  
27  
28 334 establish the two-way referral system, improve the current promotion and income  
29  
30 335 structure, pay more attention to less-experienced staff, and help doctors release their  
31  
32  
33 336 work stress.

### 35 337 **Funding statement**

36  
37  
38 338 This work was supported by National Natural Science Foundation of China  
39  
40 339 (71233008, 91224005, 71673291, 71303248), Important Disease Joint Research  
41  
42  
43 340 Project in Health Systems of Shanghai (2013ZYJB0006), and Military Health Support  
44  
45 341 Strategy and Key Technology Research for Special Injuries in the South China Sea  
46  
47  
48 342 Region (AWS12J002).

### 50 343 **Authors' contributions**

51  
52 344 This manuscript was jointly completed by JL, WY, TD, ML, and LZ. We must  
53  
54  
55 345 point out that the four authors—JL, WY, TD, ML—contributed equally to this  
56  
57

1  
2  
3 346 research. Here are the specific efforts of each author. JL, WY, TD, ML made  
4  
5  
6 347 substantial contributions to conception and design, analysis and interpretation of data,  
7  
8 348 drafting the manuscript and revising it critically for important intellectual content. LZ  
9  
10  
11 349 made substantial contributions to conception and design. All authors read and gave  
12  
13 350 final approval of the version to be published.

14  
15  
16 351 **Conflict of interest** None declared.

17  
18 352 **Data sharing statement** No additional data are available.

19  
20 353  
21  
22  
23  
24  
25  
26  
27  
28  
29  
30  
31  
32  
33  
34  
35  
36  
37  
38  
39  
40  
41  
42  
43  
44  
45  
46  
47  
48  
49  
50  
51  
52  
53  
54  
55  
56  
57  
58  
59  
60

**References**

1. Cox KB. The effects of intrapersonal, intragroup, and inter group conflict on team performance effectiveness and work satisfaction. *Nursing Administration Quarterly* 2003;**27**(2):153-63.
2. Tarcan M, Hikmet N, Schooley B, et al. An analysis of the relationship between burnout, socio-demographic and workplace factors and job satisfaction among emergency department health professionals. *Applied nursing research : ANR* 2017;**34**:40-47.
3. Zhou X, Pu J, Zhong X, et al. Burnout, psychological morbidity, job stress, and job satisfaction in Chinese neurologists. *Neurology* 2017;**88**(18):1727-35.
4. Mache S, Baresi L, Bernburg M, et al. Being prepared to work in Gynecology Medicine: evaluation of an intervention to promote junior gynecologists professionalism, mental health and job satisfaction. *Archives of gynecology and obstetrics* 2017;**295**(1):153-62.
5. Lu Y, Hu XM, Huang XL, et al. Job satisfaction and associated factors among healthcare staff: a cross-sectional study in Guangdong Province, China. *BMJ open* 2016;**6**(7):e011388.
6. Kvist T, Voutilainen A, Mantynen R, et al. The relationship between patients' perceptions of care quality and three factors: nursing staff job satisfaction, organizational characteristics and patient age. *BMC Health Serv Res* 2014;**14**:466.
7. Krueger P, White D, Meaney C, et al. Predictors of job satisfaction among academic family medicine faculty: Findings from a faculty work-life and leadership survey. *Canadian family physician Medecin de famille canadien* 2017;**63**(3):e177-e85.
8. Pedrazza M, Berlanda S, Trifiletti E, et al. Exploring physicians' dissatisfaction and work-related stress: Development of the phydis scale. *Frontiers in psychology* 2016;**7**:1238.
9. Schmit Jongbloed LJ, Cohen-Schotanus J, Borleffs JCC, et al. Physician job satisfaction related to actual and preferred job size. *BMC medical education* 2017;**17**(1):86.
10. Suarez M, Asenjo M, Sanchez M. Job satisfaction among emergency department staff. *Australasian emergency nursing journal : AENJ* 2017;**20**(1):31-36.
11. Waddimba AC, Scribani M, Krupa N, et al. Frequency of satisfaction and dissatisfaction with practice among rural-based, group-employed physicians and non-physician practitioners. *BMC Health Serv Res* 2016;**16**(1):613.
12. Ritsema TS, Roberts KA. Job satisfaction among British physician associates. *Clinical medicine (London, England)* 2016;**16**(6):511-13.
13. Pantenburg B, Kitze K, Luppia M, et al. Job satisfaction of foreign-national physicians working in patient care: a cross-sectional study in Saxony, Germany. *Journal of occupational medicine and toxicology (London, England)* 2016;**11**(1):41.
14. Watts G. Nearly half of UK young doctors say stress levels rose last year. *BMJ* 2013;**346**:1.
15. Tsuno K, Kawakami N, Inoue A, et al. Intragroup and intergroup conflict at work, psychological distress, and work engagement in a sample of employees in Japan. *Industrial health* 2009;**47**(6):640-8.
16. Siegle M. Solutions for the Violence at Medical Locations in USA. *CHINESE MEDICAL ETHICS* 2014;**27**(1):24-26.
17. Chen Q, Yang L, Feng Q, et al. Job Satisfaction Analysis in Rural China: A Qualitative Study of Doctors in a Township Hospital. *Scientifica* 2017;**2017**:1964087.
18. de Oliveira Vasconcelos Filho P, de Souza MR, Elias PE, et al. Physicians' job



- 1  
2  
3 398 satisfaction and motivation in a public academic hospital. *Hum Resour Health* 2016;**14**(1):75.  
4 399 19. Frenk J, Chen L, Bhutta ZA, et al. [Health professionals for a new century: transforming  
5 400 education to strengthen health systems in an interdependent world]. *Revista peruana de*  
6 401 *medicina experimental y salud publica* 2011;**28**(2):337-41.  
7  
8 402 20. Paternotte E, van Dulmen S, van der Lee N, et al. Factors influencing intercultural  
9 403 doctor-patient communication: a realist review. *Patient Educ Couns* 2015;**98**(4):420-45.  
10 404 21. Bergin E JH, Bergin R. Are doctors unhappy? A study of residents with an open interview  
11 405 form. *Qual Manag Health Care* 2004(**13**):8187.  
12 406 22. Adler NE, Boyce T, Chesney M A, Cohen S, Folkman S, Kahn R L, et al. Socio economic  
13 407 status and health. The challenge of the gradient. *American Psychologist* 1994;**49**(1):15-24.  
14 408 23. Cienski J. Polish doctors fall out with new government over pay. *The Lancet*  
15 409 2007;**370**(9605):2088.  
16 410 24. Holt E. Doctors in Eastern Europe prepare to walk out over pay. *The Lancet*  
17 411 2010;**376**(9737):221-22.  
18 412 25. Clark F. Doctors protest over Moscow health reforms. *The Lancet* 2014;**384**(9956):1736.  
19 413 26. Li XP, Hu HY, Shi HY. Rethinking on the policy of new medical reform: fruitful  
20 414 achievements or hidden gaps? *Negative* 2016;**37**(6):52-55.  
21 415 27. Zhou XM, Zhang XH, Hou N, et al. Analysis of compensation model and method in  
22 416 public general hospital after cancelling medicine addition. *China Pharmacy*  
23 417 2013;**24**(20):1825-27.  
24 418 28. Wang X, Xu C. Analysis of compensation methods for public hospitals after abolishing  
25 419 "pharmaceutical makeup" in new health care reform. *The Chinese Health Service*  
26 420 *Management* 2011(**12**):889-90.  
27 421 29. Ministry of Health P. Annual Health Statistics. 2012.  
28 422 30. Jingang A. Which future for doctors in China? *Lancet* 2013;**382**(9896):936-7.  
29 423 31. Qin X, Li L, Hsieh C-R. Too few doctors or too low wages? Labor supply of health care  
30 424 professionals in China. *China Economic Review* 2013;**24**(0):150-64.  
31 425 32. Center for Health Statistics and Information. An analysis report of national health services  
32 426 survey in China, 2013. Beijing: National Health and Family Planning Commission of the  
33 427 People's Republic of China, 2013.  
34 428 33. Ferreira J, Fernandes R, Haase R, et al. Minnesota Satisfaction Questionnaire–Short  
35 429 Form: estudo de adaptação e validação para a população portuguesa. *Psychologica*  
36 430 2009(**51**):251-81.  
37 431 34. Nassar Junior AP, Azevedo LC. Factors associated with job and personal satisfaction in  
38 432 adult Brazilian intensivists. *Rev Bras Ter Intensiva* 2016;**28**(2):107-13.  
39 433 35. Starmer AJ, Frintner MP, Freed GL. Work-Life Balance, Burnout, and Satisfaction of  
40 434 Early Career Pediatricians. *Pediatrics* 2016;**137**(4).  
41 435 36. Caloyeras JP, Kanter M, Ives N, et al. Physician Professional Satisfaction and Area of  
42 436 Clinical Practice: Evidence from an Integrated Health Care Delivery System. *The Permanente*  
43 437 *journal* 2016;**20**(2):35-41.  
44 438 37. DXY. A survey of Chinese doctors' payment in 2012-2013 China Health Human  
45 439 Resources 2014(**5**):74-75.  
46 440 38. Goetz K, Jossen M, Szecsenyi J, et al. Job satisfaction of primary care physicians in  
47 441 Switzerland: an observational study. *Fam Pract* 2016;**33**(5):498-503.

- 1  
2  
3 442 39. Huang DM, Yin WQ, Yu QQ, et al. Comparison of work well-being among physicians in  
4 443 public hospitals before and after the new health reform. *Chinese Journal of Hospital*  
5 444 *Administration* 2015(3):217-20.  
6 445 40. Wu LX, Qi L, Li Y. Challenges faced by young Chinese doctors. *Lancet*  
7 446 2016;**387**(10028):1617.  
8 447 41. Yu W, Li M, Nong X, et al. Practices and attitudes of doctors and patients to downward  
9 448 referral in Shanghai, China. *BMJ open* 2017;**7**(4):e012565.  
10 449 42. Tong J, Zhu Y, Jie J, et al. Analysis of current situation of Chinese health care reform by  
11 450 studying emergency overcrowding in a typical Shanghai hospital. *The American Journal of*  
12 451 *Emergency Medicine* 2012;**30**(7):1313-18.  
13 452 43. Villa S, Prenestini A, Giusepi I. A framework to analyze hospital-wide patient flow  
14 453 logistics: Evidence from an Italian comparative study. *Health Policy* 2014;**115**(2-3):196-205.  
15 454 44. Jiang NJ, Yang LC, Liu JJ. Doctors' difficulties: a survey of Chinese doctors' living  
16 455 condition conducted by DXY and Life Times. *Secondary Doctors' difficulties: a survey of*  
17 456 *Chinese doctors' living condition conducted by DXY and Life Times* 2011.  
18 457 <https://wenku.baidu.com/view/d305d0ea19e8b8f67c1cb980.html>.  
19 458 45. Zhou XL. A sudden death of a 26-year-old anesthesiologist in Zhejiang, China.  
20 459 *Secondary A sudden death of a 26-year-old anesthesiologist in Zhejiang, China* 2017.  
21 460 [http://news.youth.cn/sh/201706/t20170629\\_10193802.htm](http://news.youth.cn/sh/201706/t20170629_10193802.htm).  
22 461 46. Chen ZL. "Four major problems" of the new health care reform: the major problems and  
23 462 countermeasures of health care reform. *Cai Zheng Jian Du* 2014(33):70-71.  
24 463 47. McGowan YH, Niamh ; Burke, Helen ; Conry, Mary ; Morgan, Karen. Through doctors'  
25 464 eyes: A qualitative study of hospital doctor perspectives on their working conditions. *British*  
26 465 *Journal of Health Psychology* 2013;**18**(4):874-91.  
27 466 48. Moreno-Jimenez B, Galvez-Herrer M, Rodriguez-Carvajal R, et al. A study of physicians'  
28 467 intention to quit: the role of burnout, commitment and difficult doctor-patient interactions.  
29 468 *Psicothema* 2012;**24**(2):263-70.  
30 469 49. Kirkman MA, Watkins LD, Kitchen ND, et al. Early years neurosurgical training in the  
31 470 era of the European Working Time Directive. *British journal of neurosurgery*  
32 471 2013;**27**(5):586-9.  
33 472 50. Lu Y, Hu XM, Huang XL, et al. The relationship between job satisfaction, work stress,  
34 473 work-family conflict, and turnover intention among physicians in Guangdong, China: a  
35 474 cross-sectional study. *BMJ open* 2017;**7**(5):e014894.  
36 475 51. Lancet T. Violence against doctors: Why China? Why now? What next? *The Lancet*  
37 476 2014;**383**(9922):1013.  
38 477 52. Li H, Yu W. Enhancing community system in China's recent health reform: An effort to  
39 478 improve equity in essential health care. *Health Policy* 2011;**99**(2):167-73.  
40 479 53. Celedova L, Cevela R, Ptacek R, et al. P01-517 - Incidence of stress and depression in  
41 480 assessment medicine doctors in the Czech Republic. *European Psychiatry* 2011;**26**,  
42 481 **Supplement 1**(0):521.  
43 482  
44 483

484

**Table 1. Participants' personal and job characteristics**

|                                             | N (%)      | Job satisfaction         |                       | $\chi^2$ | P-value |
|---------------------------------------------|------------|--------------------------|-----------------------|----------|---------|
|                                             |            | Dissatisfaction<br>N (%) | Satisfaction<br>N (%) |          |         |
|                                             |            | 473 (64.8)               | 257 (35.2)            |          |         |
| <b>Sex</b>                                  |            |                          |                       | 1.448    | 0.229   |
| Male                                        | 407 (55.8) | 256 (62.9)               | 151 (37.1)            |          |         |
| Female                                      | 323 (44.2) | 217 (67.2)               | 106 (32.8)            |          |         |
| <b>Education level</b>                      |            |                          |                       | 4.565    | 0.207   |
| Junior College degree                       | 11 (1.5)   | 4 (36.4)                 | 7 (63.6)              |          |         |
| Bachelor's degree                           | 203 (27.8) | 128 (63.1)               | 75 (36.9)             |          |         |
| Master's degree                             | 331 (45.3) | 218 (65.9)               | 113 (34.1)            |          |         |
| Doctor's degree                             | 185 (25.3) | 123 (66.5)               | 62 (33.5)             |          |         |
| <b>Position</b>                             |            |                          |                       | 6.800    | 0.147   |
| Director of a clinical department           | 51 (7.0)   | 32 (62.7)                | 19 (37.3)             |          |         |
| Director of a medical technology department | 4 (0.5)    | 2 (50.0)                 | 2 (50.0)              |          |         |
| Doctor                                      | 637 (87.3) | 420 (65.9)               | 217 (34.1)            |          |         |
| Researcher                                  | 2 (0.3)    | 0 (0.0)                  | 2 (100.0)             |          |         |
| Unspecified staff                           | 36 (4.9)   | 19 (52.8)                | 17 (47.2)             |          |         |
| <b>Professional title</b>                   |            |                          |                       | 12.674   | 0.005   |
| Junior                                      | 249 (34.1) | 164 (65.9)               | 85 (34.1)             |          |         |
| Intermediate                                | 302 (41.4) | 204 (67.5)               | 98 (32.5)             |          |         |
| Associate senior                            | 127 (17.4) | 83 (65.4)                | 44 (34.6)             |          |         |
| Senior                                      | 52 (7.1)   | 22 (42.3)                | 30 (57.7)             |          |         |
| <b>Department</b>                           |            |                          |                       | 8.213    | 0.042   |
| Others                                      | 84 (11.5)  | 51 (60.7)                | 33 (39.3)             |          |         |
| Medical technology                          | 46 (6.3)   | 25 (54.3)                | 21 (45.7)             |          |         |
| Internal medicine                           | 319 (43.7) | 224 (70.2)               | 95 (29.8)             |          |         |
| Surgery                                     | 281 (38.5) | 173 (61.6)               | 108 (38.4)            |          |         |

485

486 **Table 2. Working conditions and participants' job satisfaction**

|                                                                                | N (%)      | Job satisfaction         |                       | $\chi^2$ | P-value |
|--------------------------------------------------------------------------------|------------|--------------------------|-----------------------|----------|---------|
|                                                                                |            | Dissatisfaction<br>N (%) | Satisfaction<br>N (%) |          |         |
| <b>Work hours per week (hours)</b>                                             |            | 473 (64.8)               | 257 (35.2)            | 16.935   | 0.002   |
| ≤40                                                                            | 90 (12.3)  | 44 (48.9)                | 46 (51.1)             |          |         |
| 41-55                                                                          | 277 (37.9) | 185 (66.8)               | 92 (33.2)             |          |         |
| 56-70                                                                          | 282 (38.6) | 190 (67.4)               | 92 (32.6)             |          |         |
| 71-85                                                                          | 56 (7.7)   | 42 (75.0)                | 14 (25.0)             |          |         |
| ≥86                                                                            | 25 (3.4)   | 12 (48.0)                | 13 (52.0)             |          |         |
| <b>Whether the work within working hours met hospital requirements</b>         |            |                          |                       | 13.846   | 0.008   |
| Can                                                                            | 253 (34.7) | 161 (63.6)               | 92 (36.4)             |          |         |
| Mostly can                                                                     | 367 (50.3) | 224 (61.0)               | 143 (39.0)            |          |         |
| Mostly cannot                                                                  | 68 (9.3)   | 55 (80.9)                | 13 (19.1)             |          |         |
| Cannot                                                                         | 20 (2.7)   | 15 (75.0)                | 5 (25.0)              |          |         |
| Hard to say                                                                    | 22 (3.0)   | 18 (81.8)                | 4 (18.2)              |          |         |
| <b>Life stress</b>                                                             |            |                          |                       | 20.524   | <0.0001 |
| Very light                                                                     | 2 (0.3)    | 2 (100.0)                | 0 (0.0)               |          |         |
| Relatively light                                                               | 6 (0.8)    | 3 (50.0)                 | 3 (50.0)              |          |         |
| Moderate                                                                       | 153 (21.0) | 80 (52.3)                | 73 (47.7)             |          |         |
| Relatively great                                                               | 362 (49.6) | 234 (64.6)               | 128 (35.4)            |          |         |
| Very great                                                                     | 207 (28.4) | 154 (74.4)               | 53 (25.6)             |          |         |
| <b>Work stress</b>                                                             |            |                          |                       | 39.135   | <0.0001 |
| Very light                                                                     | 0 (0.0)    | 0 (0.0)                  | 0 (0.0)               |          |         |
| Relatively light                                                               | 3 (0.4)    | 0 (0.0)                  | 3 (100.0)             |          |         |
| Moderate                                                                       | 88 (12.1)  | 37 (42.0)                | 51 (58.0)             |          |         |
| Relatively great                                                               | 358 (49.0) | 225 (62.8)               | 133 (37.2)            |          |         |
| Very great                                                                     | 281 (38.5) | 211 (75.1)               | 70 (24.9)             |          |         |
| <b>Whether current work stress increased compared to that in the past year</b> |            |                          |                       | 20.777   | <0.0001 |
| Yes                                                                            | 576 (78.9) | 392 (68.1)               | 184 (31.9)            |          |         |
| No                                                                             | 73 (10.0)  | 30 (41.1)                | 43 (58.9)             |          |         |
| Hard to say                                                                    | 81 (11.1)  | 51 (63.0)                | 30 (37.0)             |          |         |
| <b>Reflection of great work stress</b>                                         |            |                          |                       |          |         |
| Work intensity                                                                 | 480 (65.8) | 341 (71.0)               | 139 (29.0)            | 23.979   | <0.0001 |
| Long work time                                                                 | 421 (57.7) | 303 (72.0)               | 118 (28.0)            | 22.459   | <0.0001 |
| High expectations of patients                                                  | 341 (46.7) | 230 (67.4)               | 111 (32.6)            | 1.976    | 0.160   |
| High job risks                                                                 | 403 (55.2) | 291 (72.2)               | 112 (27.8)            | 21.678   | <0.0001 |
| Poor patient-doctor relationships                                              | 396 (54.2) | 277 (69.9)               | 119 (30.1)            | 10.083   | 0.001   |
| Poor colleague relationships                                                   | 42 (5.8)   | 33 (78.6)                | 9 (21.4)              | 3.708    | 0.054   |
| Fierce competition for promotion                                               | 310 (42.5) | 223 (71.9)               | 87 (28.1)             | 12.045   | 0.001   |
| Poor social evaluations                                                        | 205 (28.1) | 162 (79.0)               | 43 (21.0)             | 25.303   | <0.0001 |
| Social misunderstandings                                                       | 302 (41.8) | 208 (68.2)               | 97 (31.8)             | 2.658    | 0.103   |

|    |                                                                      |            |            |            |       |
|----|----------------------------------------------------------------------|------------|------------|------------|-------|
| 1  |                                                                      |            |            |            |       |
| 2  |                                                                      |            |            |            |       |
| 3  | <b>Whether departments once organized a community health lecture</b> |            |            | 1.542      | 0.214 |
| 4  | No                                                                   | 465 (63.7) | 309 (66.5) | 156 (33.5) |       |
| 5  | Yes                                                                  | 265 (36.3) | 164 (61.9) | 101 (38.1) |       |
| 6  |                                                                      |            |            |            |       |
| 7  | <b>Whether departments once participated in a volunteer medical</b>  |            |            |            |       |
| 8  | <b>consultation</b>                                                  |            |            | 0.213      | 0.644 |
| 9  | No                                                                   | 318 (43.6) | 209 (65.7) | 109 (34.3) |       |
| 10 | Yes                                                                  | 412 (56.4) | 264 (64.1) | 148 (35.9) |       |
| 11 | <hr/>                                                                |            |            |            |       |
| 12 | 487                                                                  |            |            |            |       |
| 13 |                                                                      |            |            |            |       |
| 14 |                                                                      |            |            |            |       |
| 15 |                                                                      |            |            |            |       |
| 16 |                                                                      |            |            |            |       |
| 17 |                                                                      |            |            |            |       |
| 18 |                                                                      |            |            |            |       |
| 19 |                                                                      |            |            |            |       |
| 20 |                                                                      |            |            |            |       |
| 21 |                                                                      |            |            |            |       |
| 22 |                                                                      |            |            |            |       |
| 23 |                                                                      |            |            |            |       |
| 24 |                                                                      |            |            |            |       |
| 25 |                                                                      |            |            |            |       |
| 26 |                                                                      |            |            |            |       |
| 27 |                                                                      |            |            |            |       |
| 28 |                                                                      |            |            |            |       |
| 29 |                                                                      |            |            |            |       |
| 30 |                                                                      |            |            |            |       |
| 31 |                                                                      |            |            |            |       |
| 32 |                                                                      |            |            |            |       |
| 33 |                                                                      |            |            |            |       |
| 34 |                                                                      |            |            |            |       |
| 35 |                                                                      |            |            |            |       |
| 36 |                                                                      |            |            |            |       |
| 37 |                                                                      |            |            |            |       |
| 38 |                                                                      |            |            |            |       |
| 39 |                                                                      |            |            |            |       |
| 40 |                                                                      |            |            |            |       |
| 41 |                                                                      |            |            |            |       |
| 42 |                                                                      |            |            |            |       |
| 43 |                                                                      |            |            |            |       |
| 44 |                                                                      |            |            |            |       |
| 45 |                                                                      |            |            |            |       |
| 46 |                                                                      |            |            |            |       |
| 47 |                                                                      |            |            |            |       |
| 48 |                                                                      |            |            |            |       |
| 49 |                                                                      |            |            |            |       |
| 50 |                                                                      |            |            |            |       |
| 51 |                                                                      |            |            |            |       |
| 52 |                                                                      |            |            |            |       |
| 53 |                                                                      |            |            |            |       |
| 54 |                                                                      |            |            |            |       |
| 55 |                                                                      |            |            |            |       |
| 56 |                                                                      |            |            |            |       |
| 57 |                                                                      |            |            |            |       |
| 58 |                                                                      |            |            |            |       |
| 59 |                                                                      |            |            |            |       |
| 60 |                                                                      |            |            |            |       |

For peer review only

488

**Table 3. Patient-related issues and job satisfaction**

|                                                                                                    | N (%)      | Job satisfaction |              | $\chi^2$ | P-value |
|----------------------------------------------------------------------------------------------------|------------|------------------|--------------|----------|---------|
|                                                                                                    |            | Dissatisfaction  | Satisfaction |          |         |
|                                                                                                    |            | N (%)            | N (%)        |          |         |
|                                                                                                    |            | 473 (64.8)       | 257 (35.2)   |          |         |
| <b>Which types of patients should seek medical treatment in tertiary A public hospitals (MCQ*)</b> |            |                  |              |          |         |
| All types                                                                                          | 301 (41.2) | 182 (60.5)       | 119 (39.5)   | 4.209    | 0.040   |
| Chronic diseases                                                                                   | 165 (22.6) | 98 (59.4)        | 67 (40.6)    | 2.726    | 0.099   |
| Rare diseases                                                                                      | 389 (53.3) | 258 (66.3)       | 131 (33.7)   | 0.854    | 0.355   |
| Common diseases                                                                                    | 171 (23.4) | 105 (61.4)       | 66 (38.6)    | 1.126    | 0.289   |
| Acute diseases                                                                                     | 321 (44.0) | 211 (65.7)       | 110 (34.3)   | 0.221    | 0.638   |
| Difficult-to-diagnose diseases                                                                     | 484 (66.3) | 321 (66.3)       | 163 (33.7)   | 1.470    | 0.225   |
| Rehabilitation                                                                                     | 71 (9.7)   | 45 (63.4)        | 26 (36.6)    | 0.069    | 0.793   |
| Serious diseases                                                                                   | 453 (62.1) | 294 (64.9)       | 159 (35.1)   | 0.006    | 0.939   |
| <b>Which types of patients doctors treated in most work hours (MCQ*)</b>                           |            |                  |              |          |         |
| Chronic diseases                                                                                   | 496 (67.9) | 321 (64.7)       | 175 (35.3)   | 0.004    | 0.950   |
| Rare diseases                                                                                      | 82 (11.2)  | 46 (56.1)        | 36 (43.9)    | 3.063    | 0.080   |
| Common diseases                                                                                    | 606 (83.0) | 399 (65.8)       | 207 (34.2)   | 1.715    | 0.190   |
| Acute diseases                                                                                     | 140 (19.2) | 87 (62.1)        | 53 (37.9)    | 0.534    | 0.465   |
| Difficult-to-diagnose diseases                                                                     | 190 (26.0) | 114 (60.1)       | 76 (40.0)    | 2.588    | 0.108   |
| Rehabilitation                                                                                     | 81 (11.1)  | 52 (64.2)        | 29 (35.8)    | 0.014    | 0.905   |
| Serious diseases                                                                                   | 150 (20.5) | 87 (58.0)        | 63 (42.0)    | 3.821    | 0.051   |
| Seeking medicine                                                                                   | 301 (41.2) | 221 (73.4)       | 80 (26.6)    | 16.713   | <0.0001 |
| <b>Whether doctors were satisfied with types of patients they treated</b>                          |            |                  |              | 49.153   | <0.0001 |
| Satisfied                                                                                          | 374 (51.2) | 198 (52.9)       | 176 (47.1)   |          |         |
| Not satisfied                                                                                      | 241 (33.0) | 192 (79.7)       | 49 (20.3)    |          |         |
| Hard to say                                                                                        | 115 (15.8) | 83 (72.2)        | 32 (27.8)    |          |         |
| <b>Which types of patients doctors expected (MCQ*)</b>                                             |            |                  |              |          |         |
| Chronic diseases                                                                                   | 267 (36.6) | 162 (60.7)       | 105 (39.3)   | 3.133    | 0.077   |
| Rare diseases                                                                                      | 338 (46.3) | 224 (66.3)       | 114 (33.7)   | 0.603    | 0.438   |
| Common diseases                                                                                    | 380 (52.1) | 228 (60.0)       | 152 (40.0)   | 7.987    | 0.005   |
| Acute diseases                                                                                     | 196 (26.8) | 143 (73.0)       | 53 (27.0)    | 7.830    | 0.005   |
| Difficult-to-diagnose diseases                                                                     | 460 (63.0) | 305 (66.3)       | 155 (33.7)   | 1.243    | 0.265   |
| Rehabilitation                                                                                     | 69 (9.5)   | 43 (62.3)        | 26 (37.7)    | 0.205    | 0.651   |
| Serious diseases                                                                                   | 348 (47.7) | 238 (68.4)       | 110 (31.6)   | 3.770    | 0.052   |
| Seeking medicine                                                                                   | 62 (8.5)   | 44 (71.0)        | 18 (29.0)    | 1.132    | 0.287   |
| <b>Which types of patients should seek medical treatment in the community health system (MCQ*)</b> |            |                  |              |          |         |
| Chronic diseases                                                                                   | 487 (66.7) | 322 (66.1)       | 165 (33.9)   | 1.125    | 0.289   |
| Rare diseases                                                                                      | 27 (3.7)   | 15 (55.6)        | 12 (44.4)    | 1.049    | 0.306   |
| Common diseases                                                                                    | 556 (76.2) | 360 (64.7)       | 196 (35.3)   | 0.002    | 0.963   |
| Acute diseases                                                                                     | 33 (4.5)   | 19 (57.6)        | 14 (42.4)    | 0.790    | 0.374   |

|                                                                         |            |            |            |        |         |
|-------------------------------------------------------------------------|------------|------------|------------|--------|---------|
| Difficult-to-diagnose diseases                                          | 30 (4.1)   | 23 (76.7)  | 7 (23.3)   | 1.933  | 0.164   |
| Rehabilitation                                                          | 368 (50.4) | 251 (68.2) | 117 (31.8) | 3.787  | 0.052   |
| Serious diseases                                                        | 23 (3.2)   | 15 (65.2)  | 8 (34.8)   | 0.002  | 0.966   |
| Seeking medicine                                                        | 518 (71.0) | 343 (66.2) | 175 (33.8) | 1.580  | 0.209   |
| <b>Evaluation of patients' medical expenses in tertiary A hospitals</b> |            |            |            | 8.352  | 0.079   |
| Very cheap                                                              | 28 (3.8)   | 24 (85.7)  | 4 (14.3)   |        |         |
| Relatively cheap                                                        | 35 (4.8)   | 26 (74.3)  | 9 (25.7)   |        |         |
| Moderate                                                                | 284 (38.9) | 176 (62.0) | 108 (38.0) |        |         |
| Relatively expensive                                                    | 334 (45.8) | 213 (63.8) | 121 (36.2) |        |         |
| Very expensive                                                          | 49 (6.7)   | 34 (69.4)  | 15 (30.6)  |        |         |
| <b>Evaluation of the extent patients respect doctors</b>                |            |            |            | 44.764 | <0.0001 |
| Not respect                                                             | 13 (1.8)   | 11 (84.6)  | 2 (15.4)   |        |         |
| Relatively not respect                                                  | 43 (5.9)   | 36 (83.7)  | 7 (16.3)   |        |         |
| Moderate                                                                | 354 (48.5) | 260 (73.4) | 94 (26.6)  |        |         |
| Relatively respect                                                      | 284 (38.9) | 145 (51.1) | 139 (48.9) |        |         |
| Respect                                                                 | 36 (4.9)   | 21 (58.3)  | 15 (41.7)  |        |         |

489 Asterisk (\*): MCQ means multiple-choice question. Participants can choose more  
 490 than one option in this question.  
 491

492 **Table 4. Logistic regression analysis of job satisfaction and its influencing factors**

| Parameter                                                                         | Estimate | P-value | OR       | 95% Wald confidence interval |             |
|-----------------------------------------------------------------------------------|----------|---------|----------|------------------------------|-------------|
|                                                                                   |          |         |          | Lower limit                  | Upper limit |
| <b>Whether doctors were satisfied with types of patients they treated</b>         |          |         |          |                              |             |
| Satisfied                                                                         | 0.876    | 0.0007  | 2.401    | 1.447                        | 3.982       |
| Not satisfied                                                                     | -0.244   | 0.408   | 0.784    | 0.440                        | 1.397       |
| Hard to say                                                                       | Ref      | Ref     | Ref      | Ref                          | Ref         |
| <b>Evaluation of the extent patients respect doctors</b>                          |          |         |          |                              |             |
| Not respect                                                                       | -1.050   | 0.261   | 0.350    | 0.056                        | 2.187       |
| Relatively not respect                                                            | -0.831   | 0.166   | 0.436    | 0.134                        | 1.412       |
| Moderate                                                                          | -0.612   | 0.136   | 0.542    | 0.242                        | 1.213       |
| Relatively respect                                                                | 0.223    | 0.573   | 1.256    | 0.568                        | 2.776       |
| Respect                                                                           | Ref      | Ref     | Ref      | Ref                          | Ref         |
| <b>Whether work intensity reflected work stress</b>                               |          |         |          |                              |             |
| No                                                                                | 0.527    | 0.009   | 1.695    | 1.143                        | 2.512       |
| Yes                                                                               | Ref      | Ref     | Ref      | Ref                          | Ref         |
| <b>Whether a poor social evaluation reflected work stress</b>                     |          |         |          |                              |             |
| No                                                                                | 0.813    | 0.0002  | 2.254    | 1.466                        | 3.466       |
| Yes                                                                               | Ref      | Ref     | Ref      | Ref                          | Ref         |
| <b>Work stress</b>                                                                |          |         |          |                              |             |
| Very light                                                                        | —        | —       | —        | —                            | —           |
| Relatively light                                                                  | 13.763   | 0.986   | >999.999 | <0.001                       | >999.999    |
| Moderate                                                                          | 1.034    | 0.001   | 2.813    | 1.553                        | 5.096       |
| Relatively great                                                                  | 0.061    | 0.763   | 1.063    | 0.714                        | 1.584       |
| Very great                                                                        | Ref      | Ref     | Ref      | Ref                          | Ref         |
| <b>Whether the work within work hours met hospital requirements</b>               |          |         |          |                              |             |
| Can                                                                               | 0.498    | 0.410   | 1.645    | 0.504                        | 5.366       |
| Mostly can                                                                        | 0.788    | 0.187   | 2.198    | 0.683                        | 7.080       |
| Mostly cannot                                                                     | -0.250   | 0.711   | 0.779    | 0.207                        | 2.926       |
| Cannot                                                                            | 0.585    | 0.482   | 1.795    | 0.352                        | 9.159       |
| Hard to say                                                                       | Ref      | Ref     | Ref      | Ref                          | Ref         |
| <b>Whether working long hours reflected work stress</b>                           |          |         |          |                              |             |
| No                                                                                | 0.303    | 0.111   | 1.354    | 0.933                        | 1.964       |
| Yes                                                                               | Ref      | Ref     | Ref      | Ref                          | Ref         |
| <b>Whether patients with common diseases were the population doctors expected</b> |          |         |          |                              |             |
| No                                                                                | -0.415   | 0.025   | 0.660    | 0.459                        | 0.945       |
| Yes                                                                               | Ref      | Ref     | Ref      | Ref                          | Ref         |
| <b>Whether patients with acute diseases were the population doctors expected</b>  |          |         |          |                              |             |
| No                                                                                | 0.360    | 0.084   | 1.434    | 0.953                        | 2.158       |
| Yes                                                                               | Ref      | Ref     | Ref      | Ref                          | Ref         |
| <b>Professional title</b>                                                         |          |         |          |                              |             |
| Junior                                                                            | -0.916   | 0.031   | 0.400    | 0.197                        | 0.811       |
| Intermediate                                                                      | -0.761   | 0.011   | 0.467    | 0.234                        | 0.933       |
| Associate senior                                                                  | -0.723   | 0.031   | 0.485    | 0.230                        | 1.022       |
| Senior                                                                            | Ref      | Ref     | Ref      | Ref                          | Ref         |

493



**Supplementary Table 1. Multicollinearity analysis**

| Variable                                                                                                          | Tolerance | Variance Inflation Factor |
|-------------------------------------------------------------------------------------------------------------------|-----------|---------------------------|
| Sex                                                                                                               | 0.815     | 1.227                     |
| Education level                                                                                                   | 0.763     | 1.310                     |
| Position                                                                                                          | 0.702     | 1.425                     |
| Professional title                                                                                                | 0.583     | 1.716                     |
| Department                                                                                                        | 0.762     | 1.313                     |
| Work hours per week (hours)                                                                                       | 0.806     | 1.240                     |
| Whether the work within work hours met hospital requirements                                                      | 0.886     | 1.129                     |
| Life stress                                                                                                       | 0.595     | 1.680                     |
| Work stress                                                                                                       | 0.473     | 2.116                     |
| Whether current work stress increased compared to that in the past year                                           | 0.737     | 1.356                     |
| Whether work intensity reflected work stress                                                                      | 0.717     | 1.394                     |
| Whether working long hours reflected work stress                                                                  | 0.741     | 1.350                     |
| Whether high expectations of patients reflected work stress                                                       | 0.794     | 1.259                     |
| Whether high job risks reflected work stress                                                                      | 0.718     | 1.393                     |
| Whether a poor patient-doctor relationship reflected work stress                                                  | 0.733     | 1.365                     |
| Whether a poor colleague relationship reflected work stress                                                       | 0.768     | 1.303                     |
| Whether fierce competition of promotion reflected work stress                                                     | 0.805     | 1.242                     |
| Whether a poor social evaluation reflected work stress                                                            | 0.729     | 1.373                     |
| Whether social misunderstandings reflected work stress                                                            | 0.697     | 1.435                     |
| Whether departments once organized a community health lecture                                                     | 0.679     | 1.473                     |
| Whether departments once participated in a volunteer medical consultation                                         | 0.657     | 1.523                     |
| Whether patients with any kinds of diseases should seek medical treatment in tertiary A public hospitals          | 0.587     | 1.703                     |
| Whether patients with chronic diseases should seek medical treatment in tertiary A public hospitals               | 0.508     | 1.969                     |
| Whether patients with rare diseases should seek medical treatment in tertiary A public hospitals                  | 0.440     | 2.271                     |
| Whether patients with common diseases should seek medical treatment in tertiary A public hospitals                | 0.584     | 1.712                     |
| Whether patients with acute diseases should seek medical treatment in tertiary A public hospitals                 | 0.531     | 1.883                     |
| Whether patients with difficult-to-diagnose diseases should seek medical treatment in tertiary A public hospitals | 0.370     | 2.703                     |
| Whether patients with rehabilitation should seek medical treatment in tertiary A public hospitals                 | 0.599     | 1.669                     |
| Whether patients with serious diseases should seek medical treatment in tertiary A public hospitals               | 0.383     | 2.609                     |
| Whether patients with chronic diseases were the most doctors treated in work hours                                | 0.675     | 1.481                     |
| Whether patients with rare diseases were the most doctors treated in                                              | 0.656     | 1.525                     |

|    |                                                                          |       |       |
|----|--------------------------------------------------------------------------|-------|-------|
| 1  |                                                                          |       |       |
| 2  |                                                                          |       |       |
| 3  | work hours                                                               |       |       |
| 4  | Whether patients with common diseases were the most doctors treated      | 0.587 | 1.704 |
| 5  | in work hours                                                            |       |       |
| 6  | Whether patients with rare diseases were the most doctors treated in     | 0.747 | 1.338 |
| 7  | work hours                                                               |       |       |
| 8  | Whether patients with difficult-to-diagnose diseases were the most       | 0.622 | 1.608 |
| 9  | doctors treated in work hours                                            |       |       |
| 10 | Whether patients with rehabilitation diseases were the most doctors      | 0.689 | 1.451 |
| 11 | treated in work hours                                                    |       |       |
| 12 | Whether patients with serious diseases were the most doctors treated in  | 0.600 | 1.666 |
| 13 | work hours                                                               |       |       |
| 14 | Whether patients seeking medicine were the most doctors treated in       | 0.576 | 1.736 |
| 15 | work hours                                                               |       |       |
| 16 | Whether doctors were satisfied with types of patients they treated       | 0.787 | 1.270 |
| 17 | Whether patients with chronic diseases were the population doctors       | 0.630 | 1.587 |
| 18 | expected                                                                 |       |       |
| 19 | Whether patients with rare diseases were the population doctors          | 0.678 | 1.476 |
| 20 | expected                                                                 |       |       |
| 21 | Whether patients with common diseases were the population doctors        | 0.655 | 1.527 |
| 22 | expected                                                                 |       |       |
| 23 | Whether patients with acute diseases were the population doctors         | 0.770 | 1.298 |
| 24 | expected                                                                 |       |       |
| 25 | Whether patients with difficult-to-diagnose diseases were the population | 0.661 | 1.513 |
| 26 | doctors expected                                                         |       |       |
| 27 | Whether patients with rehabilitation diseases were the population        | 0.656 | 1.523 |
| 28 | doctors expected                                                         |       |       |
| 29 | Whether patients with serious diseases were the population doctors       | 0.601 | 1.665 |
| 30 | expected                                                                 |       |       |
| 31 | Whether patients seeking medicine were the population doctors            | 0.810 | 1.234 |
| 32 | expected                                                                 |       |       |
| 33 | Whether patients with chronic diseases should seek medical treatment in  | 0.721 | 1.387 |
| 34 | the community health system                                              |       |       |
| 35 | Whether patients with rare diseases should seek medical treatment in the | 0.751 | 1.332 |
| 36 | community health system                                                  |       |       |
| 37 | Whether patients with common diseases should seek medical treatment      | 0.822 | 1.216 |
| 38 | in community health system                                               |       |       |
| 39 | Whether patients with acute diseases should seek medical treatment in    | 0.785 | 1.274 |
| 40 | the community health system                                              |       |       |
| 41 | Whether patients with difficult-to-diagnose diseases should seek         | 0.697 | 1.435 |
| 42 | medical treatment in the community health system                         |       |       |
| 43 | Whether patients with rehabilitation diseases should seek medical        | 0.705 | 1.419 |
| 44 | treatment in the community health system                                 |       |       |
| 45 | Whether patients with serious diseases should seek medical treatment in  | 0.639 | 1.565 |
| 46 | the community health system                                              |       |       |
| 47 |                                                                          |       |       |
| 48 |                                                                          |       |       |
| 49 |                                                                          |       |       |
| 50 |                                                                          |       |       |
| 51 |                                                                          |       |       |
| 52 |                                                                          |       |       |
| 53 |                                                                          |       |       |
| 54 |                                                                          |       |       |
| 55 |                                                                          |       |       |
| 56 |                                                                          |       |       |
| 57 |                                                                          |       |       |
| 58 |                                                                          |       |       |
| 59 |                                                                          |       |       |
| 60 |                                                                          |       |       |

|                                                                                                |       |       |
|------------------------------------------------------------------------------------------------|-------|-------|
| Whether patients seeking medicine should seek medical treatment in the community health system | 0.714 | 1.400 |
| Evaluation of patients' medical expenses in tertiary A hospitals                               | 0.859 | 1.164 |
| Evaluation of the extent patients respect doctors                                              | 0.789 | 1.267 |

---

2

For peer review only

STROBE Statement—Checklist of items that should be included in reports of *cross-sectional studies*

|                              | Item No | Recommendation                                                                                                                                                                                               | Reported on page # |
|------------------------------|---------|--------------------------------------------------------------------------------------------------------------------------------------------------------------------------------------------------------------|--------------------|
| <b>Title and abstract</b>    | 1       | (a) Indicate the study's design with a commonly used term in the title or the abstract                                                                                                                       | 1                  |
|                              |         | (b) Provide in the abstract an informative and balanced summary of what was done and what was found                                                                                                          | 2                  |
| <b>Introduction</b>          |         |                                                                                                                                                                                                              |                    |
| Background/rationale         | 2       | Explain the scientific background and rationale for the investigation being reported                                                                                                                         | 4-5                |
| Objectives                   | 3       | State specific objectives, including any prespecified hypotheses                                                                                                                                             | 5                  |
| <b>Methods</b>               |         |                                                                                                                                                                                                              |                    |
| Study design                 | 4       | Present key elements of study design early in the paper                                                                                                                                                      | 5-6                |
| Setting                      | 5       | Describe the setting, locations, and relevant dates, including periods of recruitment, exposure, follow-up, and data collection                                                                              | 5                  |
| Participants                 | 6       | (a) Give the eligibility criteria, and the sources and methods of selection of participants                                                                                                                  | 5                  |
| Variables                    | 7       | Clearly define all outcomes, exposures, predictors, potential confounders, and effect modifiers. Give diagnostic criteria, if applicable                                                                     | 6                  |
| Data sources/<br>measurement | 8*      | For each variable of interest, give sources of data and details of methods of assessment (measurement). Describe comparability of assessment methods if there is more than one group                         | 5-6                |
| Bias                         | 9       | Describe any efforts to address potential sources of bias                                                                                                                                                    | 5-6                |
| Study size                   | 10      | Explain how the study size was arrived at                                                                                                                                                                    | 5                  |
| Quantitative variables       | 11      | Explain how quantitative variables were handled in the analyses. If applicable, describe which groupings were chosen and why                                                                                 | 6                  |
| Statistical methods          | 12      | (a) Describe all statistical methods, including those used to control for confounding                                                                                                                        | 6-7                |
|                              |         | (b) Describe any methods used to examine subgroups and interactions                                                                                                                                          | 6-7                |
|                              |         | (c) Explain how missing data were addressed                                                                                                                                                                  | 5                  |
|                              |         | (d) If applicable, describe analytical methods taking account of sampling strategy                                                                                                                           | 6-7                |
|                              |         | (e) Describe any sensitivity analyses                                                                                                                                                                        | 6-7                |
| <b>Results</b>               |         |                                                                                                                                                                                                              |                    |
| Participants                 | 13*     | (a) Report numbers of individuals at each stage of study—eg numbers potentially eligible, examined for eligibility, confirmed eligible, included in the study, completing follow-up, and analysed            | 7                  |
|                              |         | (b) Give reasons for non-participation at each stage                                                                                                                                                         | 5                  |
|                              |         | (c) Consider use of a flow diagram                                                                                                                                                                           | 5                  |
| Descriptive data             | 14*     | (a) Give characteristics of study participants (eg demographic, clinical, social) and information on exposures and potential confounders                                                                     | 7-8                |
|                              |         | (b) Indicate number of participants with missing data for each variable of interest                                                                                                                          | 5                  |
| Outcome data                 | 15*     | Report numbers of outcome events or summary measures                                                                                                                                                         | 7                  |
| Main results                 | 16      | (a) Give unadjusted estimates and, if applicable, confounder-adjusted estimates and their precision (eg, 95% confidence interval). Make clear which confounders were adjusted for and why they were included | 8-10               |
|                              |         | (b) Report category boundaries when continuous variables were categorized                                                                                                                                    | 8-10               |
|                              |         | (c) If relevant, consider translating estimates of relative risk into absolute risk for                                                                                                                      | 8-10               |

a meaningful time period

|                          |    |                                                                                                                                                                            |       |
|--------------------------|----|----------------------------------------------------------------------------------------------------------------------------------------------------------------------------|-------|
| Other analyses           | 17 | Report other analyses done—eg analyses of subgroups and interactions, and sensitivity analyses                                                                             | 8-10  |
| <b>Discussion</b>        |    |                                                                                                                                                                            |       |
| Key results              | 18 | Summarise key results with reference to study objectives                                                                                                                   | 10    |
| Limitations              | 19 | Discuss limitations of the study, taking into account sources of potential bias or imprecision. Discuss both direction and magnitude of any potential bias                 | 14    |
| Interpretation           | 20 | Give a cautious overall interpretation of results considering objectives, limitations, multiplicity of analyses, results from similar studies, and other relevant evidence | 10-14 |
| Generalisability         | 21 | Discuss the generalisability (external validity) of the study results                                                                                                      | 10-14 |
| <b>Other information</b> |    |                                                                                                                                                                            |       |
| Funding                  | 22 | Give the source of funding and the role of the funders for the present study and, if applicable, for the original study on which the present article is based              | 15    |

\*Give information separately for exposed and unexposed groups.

**Note:** An Explanation and Elaboration article discusses each checklist item and gives methodological background and published examples of transparent reporting. The STROBE checklist is best used in conjunction with this article (freely available on the Web sites of PLoS Medicine at <http://www.plosmedicine.org/>, Annals of Internal Medicine at <http://www.annals.org/>, and Epidemiology at <http://www.epidem.com/>). Information on the STROBE Initiative is available at [www.strobe-statement.org](http://www.strobe-statement.org).

# BMJ Open

## A cross-sectional survey on job satisfaction and its associated factors among doctors in tertiary public hospitals in Shanghai, China

|                                 |                                                                                                                                                                                                                                                                                                                                                                                                                                                                                                                     |
|---------------------------------|---------------------------------------------------------------------------------------------------------------------------------------------------------------------------------------------------------------------------------------------------------------------------------------------------------------------------------------------------------------------------------------------------------------------------------------------------------------------------------------------------------------------|
| Journal:                        | <i>BMJ Open</i>                                                                                                                                                                                                                                                                                                                                                                                                                                                                                                     |
| Manuscript ID                   | bmjopen-2018-023823.R2                                                                                                                                                                                                                                                                                                                                                                                                                                                                                              |
| Article Type:                   | Research                                                                                                                                                                                                                                                                                                                                                                                                                                                                                                            |
| Date Submitted by the Author:   | 18-Dec-2018                                                                                                                                                                                                                                                                                                                                                                                                                                                                                                         |
| Complete List of Authors:       | Liu, Jiazhen; Shanghai Municipal Commission of Health and Family Planning, Shanghai Information Center for Health<br>Yu, Wenya; Second Military Medical University, College of Military Health Service Management<br>Ding, Tao; Second Military Medical University, College of Military Health Service Management<br>Li, Meina; Second Military Medical University, College of Military Health Service Management<br>Zhang, Lulu; Second Military Medical University, College of Military Health Service Management |
| <b>Primary Subject Heading</b>: | Health services research                                                                                                                                                                                                                                                                                                                                                                                                                                                                                            |
| Secondary Subject Heading:      | Health policy                                                                                                                                                                                                                                                                                                                                                                                                                                                                                                       |
| Keywords:                       | job satisfaction, doctor, hospital, China                                                                                                                                                                                                                                                                                                                                                                                                                                                                           |
|                                 |                                                                                                                                                                                                                                                                                                                                                                                                                                                                                                                     |

SCHOLARONE™  
Manuscripts

1  
2  
3  
4 1 **A cross-sectional survey on job satisfaction and its**  
5  
6 2 **associated factors among doctors in tertiary public hospitals**  
7  
8  
9 3 **in Shanghai, China**  
10

11 4 **Author list:** Jiazhen Liu<sup>\*,2</sup>, Wenya Yu<sup>\*,1</sup>, Tao Ding<sup>\*,1</sup>, Meina Li<sup>\*,1</sup>, Lulu Zhang<sup>\*\*,1</sup>  
12  
13

14 5 \*These authors contributed equally to the study.  
15

16 6 \*\*Corresponding author: Lulu Zhang  
17

18 7 E-mail: [zllrmit@aliyun.com](mailto:zllrmit@aliyun.com) (ZL)  
19

20 8 Tel: +86 021-81871421  
21

22 9 Fax: +86 021-81871436  
23

24 10 Address: Department of Military Health Service Management, College of Military  
25  
26  
27  
28 11 Health Service Management, Second Military Medical University, Shanghai,  
29  
30  
31  
32 12 China, 200433  
33

34  
35 13 1 Department of Military Health Service Management, College of Military Health  
36  
37 14 Service Management, Second Military Medical University, Shanghai, China, 200433  
38

39  
40 15 2 Shanghai Information Center for Health, Shanghai Municipal Commission of  
41  
42 16 Health and Family Planning, Shanghai, China, 200125  
43

44 17 Jiazhen Liu (M. M), [liujiazhen@foxmail.com](mailto:liujiazhen@foxmail.com)  
45

46 18 Wenya Yu (Ph. D), [jsjyyuwenya@sina.cn](mailto:jsjyyuwenya@sina.cn)  
47

48 19 Tao Ding (M. M), [kindy292003@163.com](mailto:kindy292003@163.com)  
49

50 20 Meina Li (Ph. D), [meinali53@sina.cn](mailto:meinali53@sina.cn)  
51

52 21 Lulu Zhang (Ph. D), [zllrmit@aliyun.com](mailto:zllrmit@aliyun.com)  
53  
54  
55  
56  
57  
58  
59  
60

1  
2  
3  
4 23 **Abstract**

5  
6 24 **Objectives:** Doctors in public hospitals in China face considerable pressure and  
7  
8  
9 25 excessive workloads, which are likely to predispose them to job dissatisfaction. We  
10  
11 26 explored the job satisfaction of doctors and examined the influence of diverse  
12  
13  
14 27 sociodemographic characteristics.

15  
16  
17 28 **Design:** This was a cross-sectional study.

18  
19 29 **Setting:** Eleven tertiary public hospitals in Shanghai, China.

20  
21  
22 30 **Participants:** The questionnaire was designed based on the 5th National Health  
23  
24 31 Service General Research, which was based on the Minnesota Satisfaction  
25  
26 32 Questionnaire. Questionnaires were administered to 897 doctors randomly (using  
27  
28 33 random number tables), and 730 were returned completed (response rate = 81.4%).  
29  
30  
31 34 Doctors who volunteered and provided informed, written consent participated.

32  
33 35 **Primary outcome measures:** The dependent variable was doctors' job satisfaction.

34  
35 36 **Results:** Statistical analyses were conducted using SPSS and SAS. Overall, 64.8% of  
36  
37 37 participants were dissatisfied with their jobs. Factors that were statistically significant  
38  
39 38 to doctors' job satisfaction in the univariate analysis were entered into the logistic  
40  
41 39 regression analysis, including doctors' professional title, department, work hours,  
42  
43 40 work requirements (reflected as the number of patients they diagnosed and treated  
44  
45 41 monthly), life and work stress, and the types of patients that doctors treated or  
46  
47 42 expected to treat. The results of the logistic regression analysis suggested that doctors'  
48  
49 43 job satisfaction was related to their professional title, types of patients that doctors  
50  
51 44 treated or expected to treat, as well as their work stress.  
52  
53  
54  
55  
56  
57  
58  
59  
60



1  
2  
3  
4 45 **Conclusions:** There is an urgent need for public hospitals in China to establish a more  
5  
6 46 reasonable promotion and management system for doctors, encourage patients to  
7  
8  
9 47 accept the two-way referral, pay more attention to less-experienced staff, and help  
10  
11  
12 48 doctors release their work stress.  
13  
14 49 **Keywords:** job satisfaction; doctor; hospital; China  
15  
16  
17  
18  
19  
20  
21  
22  
23  
24  
25  
26  
27  
28  
29  
30  
31  
32  
33  
34  
35  
36  
37  
38  
39  
40  
41  
42  
43  
44  
45  
46  
47  
48  
49  
50  
51  
52  
53  
54  
55  
56  
57  
58  
59  
60

For peer review only

1  
2  
3  
4 51 **Strengths and limitations of this study**  
5

6 52 ■ We tried to suggest ways to improve doctors' job satisfaction and promote  
7  
8 becoming a doctor in China.  
9

10  
11 54 ■ We provided a valuable reference for others interested in doctors' job satisfaction  
12  
13 and working conditions in China.  
14  
15

16  
17 56 ■ We provided quantitative data concerning doctors' working conditions.  
18

19  
20 57 ■ Our research findings are only representative of doctors in tertiary A public  
21  
22 hospitals in China.  
23

24  
25 59 ■ Income or income-workload balance was not explored in this study, which is a  
26  
27 major limitation.  
28  
29  
30  
31  
32  
33  
34  
35  
36  
37  
38  
39  
40  
41  
42  
43  
44  
45  
46  
47  
48  
49  
50  
51  
52  
53  
54  
55  
56  
57  
58  
59  
60

## 62 **Background**

63 Work-related problems of doctors are growing global concerns, especially  
64 doctors' job satisfaction<sup>1</sup>. Job satisfaction comprises issues such as burnout<sup>2,3</sup>, mental  
65 health<sup>4</sup>, work-family balance<sup>5</sup>, and quality of care<sup>6</sup>. Several studies have explored job  
66 satisfaction, including its diverse dimensions<sup>2</sup>; its influencing factors<sup>7</sup>; and  
67 interrelationships between burnout<sup>3</sup>, work stress<sup>8,9</sup>, mental health<sup>4</sup> and job satisfaction  
68 among doctors, nurses, and medical staff in diverse departments, regions and  
69 countries<sup>10</sup>. Several studies in different countries have also indicated that income and  
70 income-workload balance are related to doctors' job satisfaction<sup>11-13</sup>.

71 Scholars from different countries such as the United States, the United Kingdom,  
72 and Germany have tried to deal with problems concerning job dissatisfaction<sup>14-16</sup>. For  
73 example, scholars in the United States noted that workload, work meaningfulness,  
74 relational needs, tolerance, and risk-taking attitudes were associated with job  
75 satisfaction<sup>14</sup>. Researchers in the United Kingdom indicated that whether physicians  
76 can fully use their training was a key factor influencing their job satisfaction<sup>15</sup>.  
77 Scholars in Germany paid more attention to foreign-national physicians and suggested  
78 that human relations and social status were related to their job satisfaction<sup>16</sup>. In  
79 addition, job characteristics<sup>9,10,17-21</sup> and personal factors<sup>22-25</sup> have been found to affect  
80 job satisfaction.

81 Further, doctors themselves pay great attention to job satisfaction. Doctors  
82 worldwide fight for their own rights to improve job satisfaction, working condition,  
83 professional accomplishments, and career development. For example, doctors in

1  
2  
3  
4 84 Poland<sup>26</sup> and the Czech Republic<sup>27</sup> have had conflicts with their respective  
5  
6 85 governments regarding overwork. Fortunately, doctors in many countries and regions  
7  
8  
9 86 have succeeded in this fight, which ultimately improves their job satisfaction, work  
10  
11  
12 87 efficiency, and care quality<sup>28</sup>.

13  
14 88 Moreover, healthcare reform is a vital component of doctors' job satisfaction and  
15  
16  
17 89 working conditions, and China is no exception. In Chinese healthcare reform, the  
18  
19  
20 90 government pays considerable attention to reducing medication costs<sup>29</sup>. Hospitals are  
21  
22  
23 91 expected to sell drugs to patients without adding a 15% profit, which may decrease  
24  
25  
26 92 the hospital's income<sup>30</sup>. Other policies such as controlling medication fees per visit  
27  
28  
29 93 and the cost of medical insurance have reduced doctors' decision-making power.  
30  
31  
32 94 Consequently, hospital management may force doctors to work overtime to augment  
33  
34  
35 95 or maintain hospital income if there is not enough government compensation<sup>31</sup>.  
36  
37  
38 96 Moreover, doctors had to change their behaviors to fulfill hospital income indicators.  
39  
40  
41 97 In China, over 4.5 million doctors are under increasing pressures to see more patients,  
42  
43  
44 98 meet increased administrative requirements, and keep up with government  
45  
46  
47 99 regulations<sup>32</sup>. Moreover, the lives of doctors are threatened in hospitals owing to poor  
48  
49  
50 100 doctor-patient relationships<sup>33</sup>. As doctors are overworked, underpaid, and under  
51  
52  
53 101 threat, some scholars have wondered who will be the next doctors in China<sup>34</sup>.

54  
55  
56 102 Therefore, the main purpose of this study was to suggest ways to promote the  
57  
58  
59 103 development of more doctors in China and improve the condition of doctors. We  
60  
104 determined what factors affect doctors' job satisfaction in China and provide practical  
105 recommendations to improve Chinese doctors' job satisfaction and working

1  
2  
3  
4 106 conditions.

5  
6 107 **Methods**

7  
8  
9 108 ***Participants***

10  
11 109 Between June 18 and September 27, 2013, a cross-sectional survey of doctors'  
12  
13  
14 110 job satisfaction was conducted in Shanghai, China. Using random number tables, we  
15  
16  
17 111 selected eleven tertiary public hospitals in Shanghai. Questionnaires were  
18  
19  
20 112 administered to 1,000 doctors in these hospitals. All participants were also chosen  
21  
22  
23 113 through random number tables, which were based on doctors' job number. Of the  
24  
25 114 1,000 participants, 897 were willing to participate, and 103 doctors were excluded  
26  
27 115 from this study because of their unwillingness to participate. Of these, 730 were  
28  
29  
30 116 returned complete (valid response rate = 81.4%). Doctors who volunteered and  
31  
32  
33 117 provided informed, written consent participated. Researchers addressed doctors'  
34  
35 118 queries and doubts regarding the questionnaire as needed.

36  
37  
38 119 ***Instrument Development and Validation***

39  
40 120 The questionnaire was designed to examine doctors' working conditions and job  
41  
42  
43 121 satisfaction. The questionnaire was designed based on the 5th National Health Service  
44  
45  
46 122 General Research by the National Health and Family Planning Commission of the  
47  
48 123 People's Republic of China<sup>35</sup>. The general survey of the National Health Service  
49  
50  
51 124 included job satisfaction of medical staff. It was a rigorously developed instrument,  
52  
53  
54 125 based on the well-known and widely used Minnesota Satisfaction Questionnaire<sup>36</sup>. Its  
55  
56 126 content validity was validated through an expert panel discussion, which included 5  
57  
58  
59 127 experts. To determine the internal consistency of this questionnaire, Cronbach's  $\alpha$   
60

1  
2  
3  
4 128 coefficient was calculated, which was 0.65. The Kaiser-Meyer-Olkin (KMO) test was  
5  
6 129 used as a screening test for factorability, which was 0.703 ( $p < 0.001$ ), indicating  
7  
8  
9 130 acceptable validity.

10  
11 131 We collected data on sociodemographic variables such as age, sex, education  
12  
13  
14 132 level, position, professional title, and department. Positions comprised directors,  
15  
16  
17 133 doctors, researchers, and unspecified staff. The unspecified staff members were  
18  
19  
20 134 doctoral students studying and working in these hospitals. There were some structured  
21  
22 135 questions about types of patients, including types of patients that doctors thought  
23  
24  
25 136 should be treated in different healthcare institutions, doctors' satisfaction with the  
26  
27 137 types of patients they were treating, and what types of patients they expected to treat.  
28  
29  
30 138 In addition, we asked about doctors' work time, life stress, work stress, and the  
31  
32  
33 139 sources of work stress. The sources of work stress included work intensity, long  
34  
35 140 hours, patients' lofty expectations, job risks, poor patient-doctor relationships, poor  
36  
37 141 colleague relationships, competition for promotion, poor social evaluations, and  
38  
39  
40 142 societal misunderstandings. Work intensity reflected the quantum of doctors' work,  
41  
42  
43 143 which was mainly evaluated by the number of patients that doctors diagnosed and  
44  
45 144 treated (including surgery). Poor social evaluations reflected doctors' reputation  
46  
47  
48 145 among patients, which considered doctors' professional abilities and personal  
49  
50  
51 146 characteristics. We also asked doctors to rate their relationships with patients and  
52  
53 147 evaluate patients' medical expenses. Questions about working and life stress, and  
54  
55  
56 148 doctor-patient relationships were measured using a 5-point Likert scale (*not*  
57  
58 149 *respectful*, *relatively not respectful*, *moderate*, *relatively respectful*, and *very*  
59  
60

1  
2  
3  
4 150 *respectful*). Doctors' job satisfaction was the dependent variable in this study.  
5  
6  
7 151 Because job satisfaction and dissatisfaction were evaluated from multiple aspects,  
8  
9 152 doctors had to make an evaluation of their job based on their work time, life stress,  
10  
11 153 work stress, and the sources of work stress. Based on the definition by Gothe et al.<sup>37</sup>,  
12  
13  
14 154 if the individual is happy with their job after considering all the above factors, they  
15  
16  
17 155 could evaluate their job as satisfactory; otherwise, they could evaluate it as  
18  
19  
20 156 dissatisfactory.

### 21 22 157 ***Ethical Approval***

23  
24  
25 158 The study protocol was approved by the ethics committee of the Second Military  
26  
27 159 Medical University. We protected the participants' confidentiality. All participants  
28  
29  
30 160 provided written informed consent.

### 31 32 161 ***Statistical Analyses***

33  
34  
35 162 All data were entered into Epidata version 3.1 and analyzed using SPSS version  
36  
37 163 19.0 and SAS version 8.0. Sociodemographic data were described using frequencies  
38  
39  
40 164 and percentages. Chi-square tests were employed to test the differences in job  
41  
42  
43 165 satisfaction among doctors with different personal characteristics and other factors. A  
44  
45 166 binary logistic regression analysis was further used to verify the influence of factors  
46  
47  
48 167 on doctors' job satisfaction. In the logistic regression analysis, the dependent variable  
49  
50  
51 168 was doctors' job satisfaction. Independent variables entered into the logistic  
52  
53 169 regression analysis were based on the univariate analysis results that were all  
54  
55  
56 170 significantly related to doctors' job satisfaction. We employed the stepwise selection  
57  
58  
59 171 method, with inclusion criteria of 0.10 and exclusion criteria of 0.15. We also  
60

1  
2  
3  
4 172 employed a multicollinearity analysis to test collinearity. All tests were two-tailed and  
5  
6 173  $p < 0.05$  was considered significant.  
7  
8

9 174 ***Patient and Public Involvement***

10  
11 175 We declare that no patients or public were involved in this study.  
12  
13

14 176 **Results**

15  
16  
17 177 ***Characteristics, Working Condition, and Job Satisfaction***

18  
19 178 Overall, 64.8% of participants were dissatisfied with their jobs. Participants'  
20  
21  
22 179 personal and job characteristics are shown in Table 1.  
23

24  
25 180 **Table 1. Participants' personal and job characteristics**

26  
27 181 Working conditions and participants' job satisfaction are shown in Table 2.  
28

29  
30 182 Nearly 88% of the participants worked more than 40 hours a week. It was found that  
31  
32 183 85% of the doctors could basically meet the hospitals' working requirements, which  
33  
34  
35 184 were reflected as the number of patients they diagnosed and treated monthly. Most  
36  
37  
38 185 reported work and life stress, which had increased in the last year, and was due to  
39  
40  
41 186 working intensity, long hours, and job risks. In addition, about one-third of doctors  
42  
43  
44 187 reported that their departments organized a community health lecture, and more than  
45  
46 188 half of the departments participated in a volunteer medical consultation.  
47

48 189 **Table 2. Working conditions and participants' job satisfaction**

49  
50 190 Considering the types of patients, participants believed patients with  
51  
52  
53 191 difficult-to-diagnose diseases, serious diseases, and rare diseases should seek medical  
54  
55  
56 192 treatment in tertiary A hospitals. Most participants treated patients with common  
57  
58  
59 193 diseases, chronic diseases, and those seeking medicine; only about half of them were  
60



1  
2  
3  
4 194 satisfied with the type of patients they met, which differed from whom they were  
5  
6 195 expecting to treat more often. Participants felt that many of these patients should seek  
7  
8  
9 196 medical treatment in the community health system, especially patients with common  
10  
11 197 and chronic diseases, and those seeking medicines. Further, about half of the  
12  
13  
14 198 participants thought patients' medical expenses were costly. Lastly, less than half of  
15  
16  
17 199 the participants felt respected by their patients (Table 3).

### 200 **Table 3. Patient-related issues and job satisfaction**

#### 201 *Univariate Analysis of Job Satisfaction and its Influencing Factors*

202 Using chi-square tests, the relationships between job satisfaction and other  
203 factors were examined. Results indicated that several factors significantly influenced  
204 doctors' job satisfaction (all p-values < 0.05), including the following: professional  
205 title ( $\chi^2 = 12.674$ ), department ( $\chi^2 = 8.213$ ), work hours every week ( $\chi^2 = 16.935$ ),  
206 whether the work within working hours met hospital requirements ( $\chi^2 = 13.846$ ), life  
207 stress ( $\chi^2 = 20.524$ ), work stress ( $\chi^2 = 39.135$ ), whether current work stress increased  
208 compared to that in the past year ( $\chi^2 = 20.777$ ), whether work intensity reflected work  
209 stress ( $\chi^2 = 23.979$ ), whether working long hours reflected work stress ( $\chi^2 = 22.459$ ),  
210 whether high jobs risks reflected work stress ( $\chi^2 = 21.678$ ), whether a poor  
211 patient-doctor relationship reflected work stress ( $\chi^2 = 1.083$ ), whether competition for  
212 promotion reflected work stress ( $\chi^2 = 12.045$ ), whether a poor social evaluation  
213 reflected work stress ( $\chi^2 = 25.303$ ), whether patients should seek medical treatment in  
214 tertiary A hospitals ( $\chi^2 = 4.209$ ), whether patients seeking medicine were the most  
215 common type doctors treated ( $\chi^2 = 16.713$ ), whether doctors were satisfied with the

1  
2  
3  
4 216 type of patients they treated ( $\chi^2 = 49.153$ ), whether patients with common diseases  
5  
6 217 were the population doctors expected ( $\chi^2 = 7.987$ ), whether patients with acute  
7  
8 218 diseases were the population doctors expected ( $\chi^2 = 7.830$ ), and the extent patients  
9  
10 219 respected doctors ( $\chi^2 = 44.764$ ) (Tables 1–3).

## 220 *Logistic Regression Analysis of Job Satisfaction and its Influencing Factors*

221 Variables that were significant to doctors' job satisfaction in the univariate  
222 analysis were included in the binary logistic regression analysis. To testify the  
223 collinearity among variables, a multicollinearity analysis was conducted. If tolerance  
224 is  $< 0.1$  or the variance inflation factor (VIF) is  $> 5$ , collinearity exists. The  
225 multicollinearity analysis indicated that collinearity did not exist (Supplementary  
226 Table 1).

227 As shown in Table 4, 9 factors were entered into the logistic regression model.  
228 Doctors who were satisfied with the types of patients they treated were more likely to  
229 be satisfied with their job compared to those who were not satisfied. Doctors who did  
230 not consider work intensity or poor social evaluation as reflective of their work stress  
231 had more job satisfaction than did their counterparts. Doctors who felt moderate work  
232 stress felt more satisfied with their job compared with those with great work stress.  
233 Doctors who had an expectation of treating patients with common diseases were more  
234 satisfied with their jobs. Lastly, doctors with senior professional titles were more  
235 satisfied with their job compared with doctors with lower-level titles.

## 236 **Table 4. Logistic regression analysis of job satisfaction and its influencing factors**

## 237 **Discussion**

1  
2  
3  
4 238 Doctors' job satisfaction was influenced by their professional title, patient  
5  
6 239 composition, and work stress. Some factors like department, work hours, patients'  
7  
8  
9 240 respect, and life stress were also related to doctors' job satisfaction.

11 241 First, unlike some studies in other countries and regions, demographic  
12  
13  
14 242 characteristics (e.g., sex and education background) were not influencing factors of  
15  
16  
17 243 job satisfaction<sup>38 39</sup>. Only doctors' professional title played a role, which was  
18  
19 244 supported by other studies in China<sup>5</sup> and Canada<sup>40</sup>. Junior doctors were less satisfied  
20  
21  
22 245 with their job, which may be attributed to many other factors. Because doctors'  
23  
24  
25 246 income was related to their professional title<sup>41</sup>, the annual income of junior doctors  
26  
27 247 was always lower than that of senior doctors. However, studies have proposed that  
28  
29  
30 248 income positively influences doctors' job satisfaction<sup>2 5 20 42</sup>. In addition, a study in the  
31  
32  
33 249 United Kingdom noted that young staff may fail to fully use their training, which  
34  
35 250 could foster low satisfaction<sup>15</sup>. This can also be explained by opportunities to use  
36  
37  
38 251 one's abilities and personal accomplishments during daily work, which were other  
39  
40  
41 252 aspects impeding young staff from enjoying job satisfaction<sup>7</sup>. Moreover, junior  
42  
43 253 doctors in China face additional difficulties, including an unfair promotion system<sup>43</sup>.  
44  
45  
46 254 Furthermore, the new policy about specialist standardization training places more  
47  
48 255 pressure on young staff, since it requires doctors to do an additional 2–4 years of  
49  
50  
51 256 specialist training after completing 3 years of resident standardization training<sup>44</sup>.  
52  
53 257 During this process, young doctors may become unsatisfied with their income and  
54  
55  
56 258 their inability to support their families, which, in turn, promotes further job  
57  
58  
59 259 dissatisfaction.

1  
2  
3  
4 260 Second, patient composition was a significant factor influencing doctors' job  
5  
6 261 satisfaction. Around 51.2% of the doctors were satisfied with the type of patients they  
7  
8  
9 262 treated; however, 52.1% of the doctors mostly treated patients with common diseases  
10  
11 263 every day. The low satisfaction seemed to reflect the gap between their expectations  
12  
13  
14 264 and the reality. Given that doctors in tertiary A public hospitals have the best  
15  
16  
17 265 professional abilities and hope to deal with the most difficult and complicated  
18  
19 266 diseases, they expect to treat patients with difficult-to-diagnose diseases. However,  
20  
21  
22 267 unlike the two-way referral system in many developed countries (e.g., the United  
23  
24 268 States), patients in China can choose the health institution they prefer<sup>45</sup>. This causes  
25  
26  
27 269 overcrowding in tertiary A public hospitals<sup>46</sup>, regardless of disease type. In fact, many  
28  
29  
30 270 patients with common, mild, or chronic diseases do not need to visit tertiary A public  
31  
32  
33 271 hospitals, as this wastes high-quality medical resources. Under these circumstances,  
34  
35  
36 272 doctors who wish to solve difficult-to-diagnose cases feel disappointed and  
37  
38 273 dissatisfied with their work<sup>14</sup>. To solve this problem, hospital patient flow logistics  
39  
40  
41 274 should be controlled<sup>47</sup>. Encouraging patients and doctors to accept the two-way  
42  
43  
44 275 referral is vital; however, the level of trust between doctors and patients is also  
45  
46 276 critical. Moreover, it should be noted that inadequate time spent treating  
47  
48 277 difficult-to-diagnose diseases has a negative effect on doctors' skill development,  
49  
50  
51 278 which can also cause doctors' job dissatisfaction. Policymakers and hospital  
52  
53  
54 279 administrators should provide more opportunities to doctors expecting more  
55  
56 280 difficult-to-diagnose patients, especially junior doctors.

57  
58 281 Third, work stress was related to job satisfaction, which supported a past study<sup>5</sup>.

1  
2  
3  
4 282 However, we also found that relative work stress (i.e., comparing work stress to that  
5  
6 283 in the past year) more significantly predicted job satisfaction than did present work  
7  
8  
9 284 stress. Doctors who felt greater relative work stress were more likely to be dissatisfied  
10  
11 285 with their job than their counterparts. In addition, the factors that doctors consider as  
12  
13  
14 286 reflective of work stress, especially work intensity and social evaluation, require  
15  
16  
17 287 attention. Doctors working in tertiary A public hospitals usually undertake many  
18  
19 288 clinical tasks; for example, because of the excess of patients, doctors have to diagnose  
20  
21 289 and treat them as fast as possible, which limits doctors' ability to take breaks<sup>48</sup>.  
22  
23  
24 290 Moreover, several doctors have been reported to die suddenly, possibly because of the  
25  
26  
27 291 work intensity<sup>49</sup>. Similar studies in other countries have also stated that work intensity  
28  
29  
30 292 negatively affects job satisfaction<sup>14 38</sup>. Moreover, improving their social evaluation  
31  
32  
33 293 may improve doctors' job satisfaction. At present, doctors in China do not have a  
34  
35  
36 294 good reputation because of some doctors pursuing personal economic interests by  
37  
38 295 prescribing unnecessary medicine or tests for patients<sup>50</sup>. It must be noted that there are  
39  
40  
41 296 many other doctors who do not resort to such unethical practices; however, they also  
42  
43  
44 297 become victims of this stigmatization. Our society should maintain an objective and  
45  
46 298 impartial attitude towards most doctors and supervise those with a poor reputation.

47  
48 299 Fourth, doctors' long work hours require attention. Working overtime has caused  
49  
50  
51 300 low job satisfaction worldwide, such as in Britain<sup>51</sup>, Spain<sup>52</sup>, and Switzerland<sup>42</sup>. Our  
52  
53  
54 301 finding was similar. Although the European Working Time Directive ruled that junior  
55  
56 302 doctors should work no more than 48 hours per week<sup>53</sup>, this was unrealistic in China.  
57  
58  
59 303 Doctors have to work overtime, which often limits their family time and spare time.  
60

1  
2  
3  
4 304 However, a study proposed that work-private hours also play a key role in job  
5  
6 305 satisfaction<sup>9</sup>. In addition, in Chinese hospitals, doctors' payment is based on their  
7  
8  
9 306 performance, indicating that meeting job requirements may be more critical than  
10  
11 307 working long hours. Moreover, performance is critical for promotion, especially for  
12  
13  
14 308 junior doctors. Therefore, there is an urgent need to shorten doctors' weekly work  
15  
16  
17 309 hours and change the current promotion and income structure, which may promote  
18  
19 310 increased job satisfaction<sup>54</sup>.

21  
22 311 Fifth, it is reasonable to assume that if doctors feel respected by patients, they  
23  
24 312 will be more satisfied with their work. Respect from patients indicates that their  
25  
26  
27 313 professional abilities, personal characteristics, and good reputation are recognized. All  
28  
29  
30 314 of these good aspects would accelerate doctors' enthusiasms of their work, which then  
31  
32 315 reflected as job satisfaction. However, due to the overcrowding of patients in tertiary  
33  
34  
35 316 A public hospitals, patients spend a long time waiting to register, pay, and fill  
36  
37 317 prescriptions compared to the short time meeting the doctors. This unreasonable  
38  
39  
40 318 phenomenon has reduced patients' satisfaction and their respect for doctors, and  
41  
42  
43 319 sometimes even results in violence against doctors<sup>55</sup>. Therefore, experiencing a poor  
44  
45  
46 320 patient-doctor relationship and violence from patients might lead to doctors' job  
47  
48 321 dissatisfaction. To address this concern and improve the patient-doctor relationship,  
49  
50 322 the number of patients visiting tertiary A public hospitals should be decreased. If  
51  
52  
53 323 patients with common or minor diseases are willing and encouraged to seek medical  
54  
55  
56 324 treatment in the community healthcare system, doctors at tertiary A hospitals can  
57  
58 325 spend more time diagnosing, treating, and communicating with patients, while  
59  
60

1  
2  
3  
4 326 maintaining a positive and patient attitude<sup>56</sup>.

5  
6 327 Lastly, other life stress is also related to job satisfaction, and problems such as  
7  
8  
9 328 depression and burnout require consideration<sup>57</sup>. Work-family conflict should also be  
10  
11 329 addressed to avoid job dissatisfaction<sup>5</sup>. Moreover, doctors' professional title and  
12  
13  
14 330 department might factor into their job satisfaction. Junior doctors might experience  
15  
16  
17 331 more life stress due to supporting their families; therefore, these doctors may require  
18  
19  
20 332 additional support. Doctors in different departments may also enjoy various  
21  
22  
23 333 extensions of job satisfaction<sup>21</sup>, indicating that hospital administrators should improve  
24  
25 334 the working conditions to various degrees according to the doctors' departments.

26  
27 335 There are two limitations to this study. First, due to doctors' unwillingness to  
28  
29  
30 336 answer questions about certain personal information, information on age distribution  
31  
32  
33 337 and income were not obtained, which made it impossible to explore the effects of  
34  
35  
36 338 these on job satisfaction. Second, this survey was only conducted in eleven tertiary A  
37  
38  
39 339 public hospitals in Shanghai, which limits generalizability. Future studies should  
40  
41 340 include more hospitals and more possible factors.

## 42 341 **Conclusions**

43  
44  
45 342 In conclusion, most doctors were not satisfied with their jobs in Shanghai, China,  
46  
47  
48 343 and this was mainly influenced by their professional title, patient composition, and  
49  
50  
51 344 work stress. To address this problem, policymakers and hospital administrators should  
52  
53  
54 345 establish the two-way referral system, improve the current promotion and income  
55  
56  
57 346 structure, pay more attention to less-experienced staff, and help doctors release their  
58  
59 347 work stress.  
60

1  
2  
3  
4 348 **Funding statement**  
5

6 349 This work was supported by National Natural Science Foundation of China  
7  
8  
9 350 (71233008, 91224005, 71673291, 71303248), Important Disease Joint Research  
10  
11 351 Project in Health Systems of Shanghai (2013ZYJB0006), and Military Health Support  
12  
13  
14 352 Strategy and Key Technology Research for Special Injuries in the South China Sea  
15  
16  
17 353 Region (AWS12J002).  
18

19 354 **Authors' contributions**  
20

21  
22 355 This manuscript was jointly completed by JL, WY, TD, ML, and LZ. We must  
23  
24 356 point out that the four authors—JL, WY, TD, ML—contributed equally to this  
25  
26  
27 357 research. Here are the specific efforts of each author. JL, WY, TD, ML made  
28  
29  
30 358 substantial contributions to conception and design, analysis and interpretation of data,  
31  
32  
33 359 drafting the manuscript and revising it critically for important intellectual content. LZ  
34  
35  
36 360 made substantial contributions to conception and design. All authors read and gave  
37  
38 361 final approval of the version to be published.  
39

40 362 **Conflict of interest** None declared.  
41

42  
43 363 **Data sharing statement** No additional data are available.  
44

45 364 **Licence statement** I, the Submitting Author has the right to grant and does grant on  
46  
47  
48 365 behalf of all authors of the Work (as defined in the below author licence), an  
49  
50  
51 366 exclusive licence and/or a non-exclusive licence for contributions from authors who  
52  
53  
54 367 are: i) UK Crown employees; ii) where BMJ has agreed a CC-BY licence shall apply,  
55  
56  
57 368 and/or iii) in accordance with the terms applicable for US Federal Government  
58  
59 369 officers or employees acting as part of their official duties; on a worldwide, perpetual,  
60



1  
2  
3  
4 370 irrevocable, royalty-free basis to BMJ Publishing Group Ltd (“BMJ”) its licensees  
5  
6 371 and where the relevant Journal is co-owned by BMJ to the co-owners of the Journal,  
7  
8  
9 372 to publish the Work in BMJ Open and any other BMJ products and to exploit all  
10  
11  
12 373 rights, as set out in our licence.  
13  
14 374 The Submitting Author accepts and understands that any supply made under these  
15  
16  
17 375 terms is made by BMJ to the Submitting Author unless you are acting as an employee  
18  
19  
20 376 on behalf of your employer or a postgraduate student of an affiliated institution which  
21  
22  
23 377 is paying any applicable article publishing charge (“APC”) for Open Access articles.  
24  
25 378 Where the Submitting Author wishes to make the Work available on an Open Access  
26  
27  
28 379 basis (and intends to pay the relevant APC), the terms of reuse of such Open Access  
29  
30  
31 380 shall be governed by a Creative Commons licence – details of these licences and  
32  
33  
34 381 which Creative Commons licence will apply to this Work are set out in our licence  
35  
36 382 referred to above.

383 **References**

- 384 1. Cox KB. The effects of intrapersonal, intragroup, and inter group conflict on team  
385 performance effectiveness and work satisfaction. *Nursing Administration Quarterly*  
386 2003;**27**(2):153-63.
- 387 2. Tarcan M, Hikmet N, Schooley B, et al. An analysis of the relationship between burnout,  
388 socio-demographic and workplace factors and job satisfaction among emergency department  
389 health professionals. *Applied nursing research : ANR* 2017;**34**:40-47.
- 390 3. Zhou X, Pu J, Zhong X, et al. Burnout, psychological morbidity, job stress, and job  
391 satisfaction in Chinese neurologists. *Neurology* 2017;**88**(18):1727-35.
- 392 4. Mache S, Baresi L, Bernburg M, et al. Being prepared to work in Gynecology Medicine:  
393 evaluation of an intervention to promote junior gynecologists professionalism, mental health  
394 and job satisfaction. *Archives of gynecology and obstetrics* 2017;**295**(1):153-62.
- 395 5. Lu Y, Hu XM, Huang XL, et al. Job satisfaction and associated factors among healthcare  
396 staff: a cross-sectional study in Guangdong Province, China. *BMJ open* 2016;**6**(7):e011388.
- 397 6. Kvist T, Voutilainen A, Mantynen R, et al. The relationship between patients' perceptions  
398 of care quality and three factors: nursing staff job satisfaction, organizational characteristics  
399 and patient age. *BMC Health Serv Res* 2014;**14**:466.
- 400 7. Krueger P, White D, Meaney C, et al. Predictors of job satisfaction among academic family  
401 medicine faculty: Findings from a faculty work-life and leadership survey. *Canadian family*  
402 *physician Medecin de famille canadien* 2017;**63**(3):e177-e85.
- 403 8. Pedrazza M, Berlanda S, Trifiletti E, et al. Exploring physicians' dissatisfaction and  
404 work-related stress: Development of the phydis scale. *Frontiers in psychology* 2016;**7**:1238.
- 405 9. Schmit Jongbloed LJ, Cohen-Schotanus J, Borleffs JCC, et al. Physician job satisfaction  
406 related to actual and preferred job size. *BMC medical education* 2017;**17**(1):86.
- 407 10. Suarez M, Asenjo M, Sanchez M. Job satisfaction among emergency department staff.  
408 *Australasian emergency nursing journal : AENJ* 2017;**20**(1):31-36.
- 409 11. Wada K, Arimatsu M, Higashi T, et al. Physician job satisfaction and working conditions  
410 in Japan. *Journal of occupational health* 2009;**51**(3):261-66.
- 411 12. Ghazali SSA, Shah IA, Zaidi SAA, et al. Job satisfaction among doctors working at  
412 teaching hospital of Bahawalpur, Pakistan. *J Ayub Med Coll Abbottabad* 2007;**19**(3):81-83.
- 413 13. Madaan N. Job satisfaction among doctors in a tertiary care teaching hospital. *JK science*  
414 2008;**10**(2):81-83.
- 415 14. Waddimba AC, Scribani M, Krupa N, et al. Frequency of satisfaction and dissatisfaction  
416 with practice among rural-based, group-employed physicians and non-physician practitioners.  
417 *BMC Health Serv Res* 2016;**16**(1):613.
- 418 15. Ritsema TS, Roberts KA. Job satisfaction among British physician associates. *Clinical*  
419 *medicine (London, England)* 2016;**16**(6):511-13.
- 420 16. Pantenburg B, Kitze K, Lupp M, et al. Job satisfaction of foreign-national physicians  
421 working in patient care: a cross-sectional study in Saxony, Germany. *Journal of occupational*  
422 *medicine and toxicology (London, England)* 2016;**11**(1):41.
- 423 17. Watts G. Nearly half of UK young doctors say stress levels rose last year. *BMJ*  
424 2013;**346**:1.
- 425 18. Tsuno K, Kawakami N, Inoue A, et al. Intragroup and intergroup conflict at work,

- 1  
2  
3 426 psychological distress, and work engagement in a sample of employees in Japan. *Industrial*  
4 427 *health* 2009;**47**(6):640-8.
- 5 428 19. Siegle M. Solutions for the Violence at Medical Locations in USA. *CHINESE MEDICAL*  
6 429 *ETHICS* 2014;**27**(1):24-26.
- 7 430 20. Chen Q, Yang L, Feng Q, et al. Job Satisfaction Analysis in Rural China: A Qualitative  
8 431 *Study of Doctors in a Township Hospital. Scientifica* 2017;**2017**:1964087.
- 9 432 21. de Oliveira Vasconcelos Filho P, de Souza MR, Elias PE, et al. Physicians' job  
10 433 *satisfaction and motivation in a public academic hospital. Hum Resour Health* 2016;**14**(1):75.
- 11 434 22. Frenk J, Chen L, Bhutta ZA, et al. [Health professionals for a new century: transforming  
12 435 *education to strengthen health systems in an interdependent world]. Revista peruana de*  
13 436 *medicina experimental y salud publica* 2011;**28**(2):337-41.
- 14 437 23. Paternotte E, van Dulmen S, van der Lee N, et al. Factors influencing intercultural  
15 438 *doctor-patient communication: a realist review. Patient Educ Couns* 2015;**98**(4):420-45.
- 16 439 24. Bergin E JH, Bergin R. Are doctors unhappy? A study of residents with an open interview  
17 440 *form. Qual Manag Health Care* 2004(**13**):8187.
- 18 441 25. Adler NE, Boyce T, Chesney M.A., Cohen S, Folkman S, Kahn R.L, et al. Socio economic  
19 442 *status and health. The challenge of the gradient. American Psychologist* 1994;**49**(1):15-24.
- 20 443 26. Cienski J. Polish doctors fall out with new government over pay. *The Lancet*  
21 444 2007;**370**(9605):2088.
- 22 445 27. Holt E. Doctors in Eastern Europe prepare to walk out over pay. *The Lancet*  
23 446 2010;**376**(9737):221-22.
- 24 447 28. Clark F. Doctors protest over Moscow health reforms. *The Lancet* 2014;**384**(9956):1736.
- 25 448 29. Li XP, Hu HY, Shi HY. Rethinking on the policy of new medical reform: fruitful  
26 449 *achievements or hidden gaps? Negative* 2016;**37**(6):52-55.
- 27 450 30. Zhou XM, Zhang XH, Hou N, et al. Analysis of compensation model and method in  
28 451 *public general hospital after cancelling medicine addition. China Pharmacy*  
29 452 2013;**24**(20):1825-27.
- 30 453 31. Wang X, Xu C. Analysis of compensation methods for public hospitals after abolishing  
31 454 *"pharmaceutical makeup" in new health care reform. The Chinese Health Service*  
32 455 *Management* 2011(**12**):889-90.
- 33 456 32. Ministry of Health P. Annual Health Statistics. 2012.
- 34 457 33. Jingang A. Which future for doctors in China? *Lancet* 2013;**382**(9896):936-7.
- 35 458 34. Qin X, Li L, Hsieh C-R. Too few doctors or too low wages? Labor supply of health care  
36 459 *professionals in China. China Economic Review* 2013;**24**(0):150-64.
- 37 460 35. Center for Health Statistics and Information. An analysis report of national health services  
38 461 *survey in China, 2013. Beijing: National Health and Family Planning Commission of the*  
39 462 *People's Republic of China, 2013.*
- 40 463 36. Ferreira J, Fernandes R, Haase R, et al. Minnesota Satisfaction Questionnaire–Short  
41 464 *Form: estudo de adaptação e validação para a população portuguesa. Psychologica*  
42 465 2009(**51**):251-81.
- 43 466 37. Gothe H, Köster A-D, Storz P, et al. Job satisfaction among doctors. *Dtsch Arztebl*  
44 467 2007;**104**(20):1394-9.
- 45 468 38. Nassar Junior AP, Azevedo LC. Factors associated with job and personal satisfaction in  
46 469 *adult Brazilian intensivists. Rev Bras Ter Intensiva* 2016;**28**(2):107-13.

- 1  
2  
3 470 39. Starmer AJ, Frintner MP, Freed GL. Work-Life Balance, Burnout, and Satisfaction of  
4 471 Early Career Pediatricians. *Pediatrics* 2016;**137**(4).
- 5 472 40. Caloyeras JP, Kanter M, Ives N, et al. Physician Professional Satisfaction and Area of  
6 473 Clinical Practice: Evidence from an Integrated Health Care Delivery System. *The Permanente*  
7 474 *journal* 2016;**20**(2):35-41.
- 8 475 41. DXY. A survey of Chinese doctors' payment in 2012-2013 China Health Human  
9 476 Resources 2014(5):74-75.
- 10 477 42. Goetz K, Jossen M, Szecsenyi J, et al. Job satisfaction of primary care physicians in  
11 478 Switzerland: an observational study. *Fam Pract* 2016;**33**(5):498-503.
- 12 479 43. Huang DM, Yin WQ, Yu QQ, et al. Comparison of work well-being among physicians in  
13 480 public hospitals before and after the new health reform. *Chinese Journal of Hospital*  
14 481 *Administration* 2015(3):217-20.
- 15 482 44. Wu LX, Qi L, Li Y. Challenges faced by young Chinese doctors. *Lancet*  
16 483 2016;**387**(10028):1617.
- 17 484 45. Yu W, Li M, Nong X, et al. Practices and attitudes of doctors and patients to downward  
18 485 referral in Shanghai, China. *BMJ open* 2017;**7**(4):e012565.
- 19 486 46. Tong J, Zhu Y, Jie J, et al. Analysis of current situation of Chinese health care reform by  
20 487 studying emergency overcrowding in a typical Shanghai hospital. *The American Journal of*  
21 488 *Emergency Medicine* 2012;**30**(7):1313-18.
- 22 489 47. Villa S, Prenestini A, Giusepi I. A framework to analyze hospital-wide patient flow  
23 490 logistics: Evidence from an Italian comparative study. *Health Policy* 2014;**115**(2-3):196-205.
- 24 491 48. Jiang NJ, Yang LC, Liu JJ. Doctors' difficulties: a survey of Chinese doctors' living  
25 492 condition conducted by DXY and Life Times. *Secondary Doctors' difficulties: a survey of*  
26 493 *Chinese doctors' living condition conducted by DXY and Life Times* 2011.  
27 494 <https://wenku.baidu.com/view/d305d0ea19e8b8f67c1cb980.html>.
- 28 495 49. Zhou XL. A sudden death of a 26-year-old anesthesiologist in Zhejiang, China.  
29 496 *Secondary A sudden death of a 26-year-old anesthesiologist in Zhejiang, China* 2017.  
30 497 [http://news.youth.cn/sh/201706/t20170629\\_10193802.htm](http://news.youth.cn/sh/201706/t20170629_10193802.htm).
- 31 498 50. Chen ZL. "Four major problems" of the new health care reform: the major problems and  
32 499 countermeasures of health care reform. *Cai Zheng Jian Du* 2014(33):70-71.
- 33 500 51. McGowan YH, Niamh ; Burke, Helen ; Conry, Mary ; Morgan, Karen. Through doctors'  
34 501 eyes: A qualitative study of hospital doctor perspectives on their working conditions. *British*  
35 502 *Journal of Health Psychology* 2013;**18**(4):874-91.
- 36 503 52. Moreno-Jimenez B, Galvez-Herrer M, Rodriguez-Carvajal R, et al. A study of physicians'  
37 504 intention to quit: the role of burnout, commitment and difficult doctor-patient interactions.  
38 505 *Psicothema* 2012;**24**(2):263-70.
- 39 506 53. Kirkman MA, Watkins LD, Kitchen ND, et al. Early years neurosurgical training in the  
40 507 era of the European Working Time Directive. *British journal of neurosurgery*  
41 508 2013;**27**(5):586-9.
- 42 509 54. Lu Y, Hu XM, Huang XL, et al. The relationship between job satisfaction, work stress,  
43 510 work-family conflict, and turnover intention among physicians in Guangdong, China: a  
44 511 cross-sectional study. *BMJ open* 2017;**7**(5):e014894.
- 45 512 55. Lancet T. Violence against doctors: Why China? Why now? What next? *The Lancet*  
46 513 2014;**383**(9922):1013.

1  
2  
3  
4  
5  
6  
7  
8  
9  
10  
11  
12  
13  
14  
15  
16  
17  
18  
19  
20  
21  
22  
23  
24  
25  
26  
27  
28  
29  
30  
31  
32  
33  
34  
35  
36  
37  
38  
39  
40  
41  
42  
43  
44  
45  
46  
47  
48  
49  
50  
51  
52  
53  
54  
55  
56  
57  
58  
59  
60

514 56. Li H, Yu W. Enhancing community system in China's recent health reform: An effort to  
515 improve equity in essential health care. Health Policy 2011;**99**(2):167-73.  
516 57. Celedova L, Cevela R, Ptacek R, et al. P01-517 - Incidence of stress and depression in  
517 assessment medicine doctors in the Czech Republic. European Psychiatry 2011;**26**,  
518 **Supplement 1**(0):521.  
519

For peer review only

521

**Table 1. Participants' personal and job characteristics**

|                                             | n (%)      | Job satisfaction         |                       | $\chi^2$ | P-value |
|---------------------------------------------|------------|--------------------------|-----------------------|----------|---------|
|                                             |            | Dissatisfaction<br>n (%) | Satisfaction<br>n (%) |          |         |
| <b>Sex</b>                                  |            | 473 (64.8)               | 257 (35.2)            | 1.448    | 0.229   |
| Male                                        | 407 (55.8) | 256 (62.9)               | 151 (37.1)            |          |         |
| Female                                      | 323 (44.2) | 217 (67.2)               | 106 (32.8)            |          |         |
| <b>Education level</b>                      |            |                          |                       | 4.565    | 0.207   |
| Junior College degree                       | 11 (1.5)   | 4 (36.4)                 | 7 (63.6)              |          |         |
| Bachelor's degree                           | 203 (27.8) | 128 (63.1)               | 75 (36.9)             |          |         |
| Master's degree                             | 331 (45.3) | 218 (65.9)               | 113 (34.1)            |          |         |
| Doctor's degree                             | 185 (25.3) | 123 (66.5)               | 62 (33.5)             |          |         |
| <b>Position</b>                             |            |                          |                       | 6.800    | 0.147   |
| Director of a clinical department           | 51 (7.0)   | 32 (62.7)                | 19 (37.3)             |          |         |
| Director of a medical technology department | 4 (0.5)    | 2 (50.0)                 | 2 (50.0)              |          |         |
| Doctor                                      | 637 (87.3) | 420 (65.9)               | 217 (34.1)            |          |         |
| Researcher                                  | 2 (0.3)    | 0 (0.0)                  | 2 (100.0)             |          |         |
| Unspecified staff                           | 36 (4.9)   | 19 (52.8)                | 17 (47.2)             |          |         |
| <b>Professional title</b>                   |            |                          |                       | 12.674   | 0.005   |
| Junior                                      | 249 (34.1) | 164 (65.9)               | 85 (34.1)             |          |         |
| Intermediate                                | 302 (41.4) | 204 (67.5)               | 98 (32.5)             |          |         |
| Associate senior                            | 127 (17.4) | 83 (65.4)                | 44 (34.6)             |          |         |
| Senior                                      | 52 (7.1)   | 22 (42.3)                | 30 (57.7)             |          |         |
| <b>Department</b>                           |            |                          |                       | 8.213    | 0.042   |
| Others                                      | 84 (11.5)  | 51 (60.7)                | 33 (39.3)             |          |         |
| Medical technology                          | 46 (6.3)   | 25 (54.3)                | 21 (45.7)             |          |         |
| Internal medicine                           | 319 (43.7) | 224 (70.2)               | 95 (29.8)             |          |         |
| Surgery                                     | 281 (38.5) | 173 (61.6)               | 108 (38.4)            |          |         |

523 **Table 2. Working conditions and participants' job satisfaction**

|                                                                                | n (%)      | Job satisfaction         |                       | $\chi^2$ | P-value |
|--------------------------------------------------------------------------------|------------|--------------------------|-----------------------|----------|---------|
|                                                                                |            | Dissatisfaction<br>n (%) | Satisfaction<br>n (%) |          |         |
|                                                                                |            | 473 (64.8)               | 257 (35.2)            |          |         |
| <b>Work hours per week (hours)</b>                                             |            |                          |                       | 16.935   | 0.002   |
| ≤40                                                                            | 90 (12.3)  | 44 (48.9)                | 46 (51.1)             |          |         |
| 41-55                                                                          | 277 (37.9) | 185 (66.8)               | 92 (33.2)             |          |         |
| 56-70                                                                          | 282 (38.6) | 190 (67.4)               | 92 (32.6)             |          |         |
| 71-85                                                                          | 56 (7.7)   | 42 (75.0)                | 14 (25.0)             |          |         |
| ≥86                                                                            | 25 (3.4)   | 12 (48.0)                | 13 (52.0)             |          |         |
| <b>Whether the work within working hours met hospital requirements</b>         |            |                          |                       | 13.846   | 0.008   |
| Can                                                                            | 253 (34.7) | 161 (63.6)               | 92 (36.4)             |          |         |
| Mostly can                                                                     | 367 (50.3) | 224 (61.0)               | 143 (39.0)            |          |         |
| Mostly cannot                                                                  | 68 (9.3)   | 55 (80.9)                | 13 (19.1)             |          |         |
| Cannot                                                                         | 20 (2.7)   | 15 (75.0)                | 5 (25.0)              |          |         |
| Hard to say                                                                    | 22 (3.0)   | 18 (81.8)                | 4 (18.2)              |          |         |
| <b>Life stress</b>                                                             |            |                          |                       | 20.524   | <0.0001 |
| Very light                                                                     | 2 (0.3)    | 2 (100.0)                | 0 (0.0)               |          |         |
| Relatively light                                                               | 6 (0.8)    | 3 (50.0)                 | 3 (50.0)              |          |         |
| Moderate                                                                       | 153 (21.0) | 80 (52.3)                | 73 (47.7)             |          |         |
| Relatively great                                                               | 362 (49.6) | 234 (64.6)               | 128 (35.4)            |          |         |
| Very great                                                                     | 207 (28.4) | 154 (74.4)               | 53 (25.6)             |          |         |
| <b>Work stress</b>                                                             |            |                          |                       | 39.135   | <0.0001 |
| Very light                                                                     | 0 (0.0)    | 0 (0.0)                  | 0 (0.0)               |          |         |
| Relatively light                                                               | 3 (0.4)    | 0 (0.0)                  | 3 (100.0)             |          |         |
| Moderate                                                                       | 88 (12.1)  | 37 (42.0)                | 51 (58.0)             |          |         |
| Relatively great                                                               | 358 (49.0) | 225 (62.8)               | 133 (37.2)            |          |         |
| Very great                                                                     | 281 (38.5) | 211 (75.1)               | 70 (24.9)             |          |         |
| <b>Whether current work stress increased compared to that in the past year</b> |            |                          |                       | 20.777   | <0.0001 |
| Yes                                                                            | 576 (78.9) | 392 (68.1)               | 184 (31.9)            |          |         |
| No                                                                             | 73 (10.0)  | 30 (41.1)                | 43 (58.9)             |          |         |
| Hard to say                                                                    | 81 (11.1)  | 51 (63.0)                | 30 (37.0)             |          |         |
| <b>Reflection of great work stress</b>                                         |            |                          |                       |          |         |
| Work intensity                                                                 | 480 (65.8) | 341 (71.0)               | 139 (29.0)            | 23.979   | <0.0001 |
| Long work time                                                                 | 421 (57.7) | 303 (72.0)               | 118 (28.0)            | 22.459   | <0.0001 |
| High expectations of patients                                                  | 341 (46.7) | 230 (67.4)               | 111 (32.6)            | 1.976    | 0.160   |
| High job risks                                                                 | 403 (55.2) | 291 (72.2)               | 112 (27.8)            | 21.678   | <0.0001 |
| Poor patient-doctor relationships                                              | 396 (54.2) | 277 (69.9)               | 119 (30.1)            | 10.083   | 0.001   |
| Poor colleague relationships                                                   | 42 (5.8)   | 33 (78.6)                | 9 (21.4)              | 3.708    | 0.054   |
| Fierce competition for promotion                                               | 310 (42.5) | 223 (71.9)               | 87 (28.1)             | 12.045   | 0.001   |
| Poor social evaluations                                                        | 205 (28.1) | 162 (79.0)               | 43 (21.0)             | 25.303   | <0.0001 |
| Social misunderstandings                                                       | 302 (41.8) | 208 (68.2)               | 97 (31.8)             | 2.658    | 0.103   |

|    |                                                                      |            |            |            |       |
|----|----------------------------------------------------------------------|------------|------------|------------|-------|
| 1  |                                                                      |            |            |            |       |
| 2  |                                                                      |            |            |            |       |
| 3  |                                                                      |            |            |            |       |
| 4  | <b>Whether departments once organized a community health lecture</b> |            |            | 1.542      | 0.214 |
| 5  | No                                                                   | 465 (63.7) | 309 (66.5) | 156 (33.5) |       |
| 6  | Yes                                                                  | 265 (36.3) | 164 (61.9) | 101 (38.1) |       |
| 7  | <b>Whether departments once participated in a volunteer medical</b>  |            |            |            |       |
| 8  | <b>consultation</b>                                                  |            |            | 0.213      | 0.644 |
| 9  |                                                                      |            |            |            |       |
| 10 | No                                                                   | 318 (43.6) | 209 (65.7) | 109 (34.3) |       |
| 11 | Yes                                                                  | 412 (56.4) | 264 (64.1) | 148 (35.9) |       |
| 12 | <hr/>                                                                |            |            |            |       |
| 13 |                                                                      |            |            |            |       |
| 14 |                                                                      |            |            |            |       |
| 15 |                                                                      |            |            |            |       |
| 16 |                                                                      |            |            |            |       |
| 17 |                                                                      |            |            |            |       |
| 18 |                                                                      |            |            |            |       |
| 19 |                                                                      |            |            |            |       |
| 20 |                                                                      |            |            |            |       |
| 21 |                                                                      |            |            |            |       |
| 22 |                                                                      |            |            |            |       |
| 23 |                                                                      |            |            |            |       |
| 24 |                                                                      |            |            |            |       |
| 25 |                                                                      |            |            |            |       |
| 26 |                                                                      |            |            |            |       |
| 27 |                                                                      |            |            |            |       |
| 28 |                                                                      |            |            |            |       |
| 29 |                                                                      |            |            |            |       |
| 30 |                                                                      |            |            |            |       |
| 31 |                                                                      |            |            |            |       |
| 32 |                                                                      |            |            |            |       |
| 33 |                                                                      |            |            |            |       |
| 34 |                                                                      |            |            |            |       |
| 35 |                                                                      |            |            |            |       |
| 36 |                                                                      |            |            |            |       |
| 37 |                                                                      |            |            |            |       |
| 38 |                                                                      |            |            |            |       |
| 39 |                                                                      |            |            |            |       |
| 40 |                                                                      |            |            |            |       |
| 41 |                                                                      |            |            |            |       |
| 42 |                                                                      |            |            |            |       |
| 43 |                                                                      |            |            |            |       |
| 44 |                                                                      |            |            |            |       |
| 45 |                                                                      |            |            |            |       |
| 46 |                                                                      |            |            |            |       |
| 47 |                                                                      |            |            |            |       |
| 48 |                                                                      |            |            |            |       |
| 49 |                                                                      |            |            |            |       |
| 50 |                                                                      |            |            |            |       |
| 51 |                                                                      |            |            |            |       |
| 52 |                                                                      |            |            |            |       |
| 53 |                                                                      |            |            |            |       |
| 54 |                                                                      |            |            |            |       |
| 55 |                                                                      |            |            |            |       |
| 56 |                                                                      |            |            |            |       |
| 57 |                                                                      |            |            |            |       |
| 58 |                                                                      |            |            |            |       |
| 59 |                                                                      |            |            |            |       |
| 60 |                                                                      |            |            |            |       |

For peer review only



525

**Table 3. Patient-related issues and job satisfaction**

|                                                                                                    | n (%)      | Job satisfaction         |                       | $\chi^2$ | P-value |
|----------------------------------------------------------------------------------------------------|------------|--------------------------|-----------------------|----------|---------|
|                                                                                                    |            | Dissatisfaction<br>n (%) | Satisfaction<br>n (%) |          |         |
|                                                                                                    |            | 473 (64.8)               | 257 (35.2)            |          |         |
| <b>Which types of patients should seek medical treatment in tertiary A public hospitals (MCQ*)</b> |            |                          |                       |          |         |
| All types                                                                                          | 301 (41.2) | 182 (60.5)               | 119 (39.5)            | 4.209    | 0.040   |
| Chronic diseases                                                                                   | 165 (22.6) | 98 (59.4)                | 67 (40.6)             | 2.726    | 0.099   |
| Rare diseases                                                                                      | 389 (53.3) | 258 (66.3)               | 131 (33.7)            | 0.854    | 0.355   |
| Common diseases                                                                                    | 171 (23.4) | 105 (61.4)               | 66 (38.6)             | 1.126    | 0.289   |
| Acute diseases                                                                                     | 321 (44.0) | 211 (65.7)               | 110 (34.3)            | 0.221    | 0.638   |
| Difficult-to-diagnose<br>diseases                                                                  | 484 (66.3) | 321 (66.3)               | 163 (33.7)            | 1.470    | 0.225   |
| Rehabilitation                                                                                     | 71 (9.7)   | 45 (63.4)                | 26 (36.6)             | 0.069    | 0.793   |
| Serious diseases                                                                                   | 453 (62.1) | 294 (64.9)               | 159 (35.1)            | 0.006    | 0.939   |
| <b>Which types of patients doctors treated in most work hours (MCQ*)</b>                           |            |                          |                       |          |         |
| Chronic diseases                                                                                   | 496 (67.9) | 321 (64.7)               | 175 (35.3)            | 0.004    | 0.950   |
| Rare diseases                                                                                      | 82 (11.2)  | 46 (56.1)                | 36 (43.9)             | 3.063    | 0.080   |
| Common diseases                                                                                    | 606 (83.0) | 399 (65.8)               | 207 (34.2)            | 1.715    | 0.190   |
| Acute diseases                                                                                     | 140 (19.2) | 87 (62.1)                | 53 (37.9)             | 0.534    | 0.465   |
| Difficult-to-diagnose<br>diseases                                                                  | 190 (26.0) | 114 (60.1)               | 76 (40.0)             | 2.588    | 0.108   |
| Rehabilitation                                                                                     | 81 (11.1)  | 52 (64.2)                | 29 (35.8)             | 0.014    | 0.905   |
| Serious diseases                                                                                   | 150 (20.5) | 87 (58.0)                | 63 (42.0)             | 3.821    | 0.051   |
| Seeking medicine                                                                                   | 301 (41.2) | 221 (73.4)               | 80 (26.6)             | 16.713   | <0.0001 |
| <b>Whether doctors were satisfied with types of patients they treated</b>                          |            |                          |                       | 49.153   | <0.0001 |
| Satisfied                                                                                          | 374 (51.2) | 198 (52.9)               | 176 (47.1)            |          |         |
| Not satisfied                                                                                      | 241 (33.0) | 192 (79.7)               | 49 (20.3)             |          |         |
| Hard to say                                                                                        | 115 (15.8) | 83 (72.2)                | 32 (27.8)             |          |         |
| <b>Which types of patients doctors expected (MCQ*)</b>                                             |            |                          |                       |          |         |
| Chronic diseases                                                                                   | 267 (36.6) | 162 (60.7)               | 105 (39.3)            | 3.133    | 0.077   |
| Rare diseases                                                                                      | 338 (46.3) | 224 (66.3)               | 114 (33.7)            | 0.603    | 0.438   |
| Common diseases                                                                                    | 380 (52.1) | 228 (60.0)               | 152 (40.0)            | 7.987    | 0.005   |
| Acute diseases                                                                                     | 196 (26.8) | 143 (73.0)               | 53 (27.0)             | 7.830    | 0.005   |
| Difficult-to-diagnose<br>diseases                                                                  | 460 (63.0) | 305 (66.3)               | 155 (33.7)            | 1.243    | 0.265   |
| Rehabilitation                                                                                     | 69 (9.5)   | 43 (62.3)                | 26 (37.7)             | 0.205    | 0.651   |
| Serious diseases                                                                                   | 348 (47.7) | 238 (68.4)               | 110 (31.6)            | 3.770    | 0.052   |
| Seeking medicine                                                                                   | 62 (8.5)   | 44 (71.0)                | 18 (29.0)             | 1.132    | 0.287   |
| <b>Which types of patients should seek medical treatment in the community health system (MCQ*)</b> |            |                          |                       |          |         |
| Chronic diseases                                                                                   | 487 (66.7) | 322 (66.1)               | 165 (33.9)            | 1.125    | 0.289   |
| Rare diseases                                                                                      | 27 (3.7)   | 15 (55.6)                | 12 (44.4)             | 1.049    | 0.306   |
| Common diseases                                                                                    | 556 (76.2) | 360 (64.7)               | 196 (35.3)            | 0.002    | 0.963   |
| Acute diseases                                                                                     | 33 (4.5)   | 19 (57.6)                | 14 (42.4)             | 0.790    | 0.374   |

|                                                                         |            |            |            |        |         |
|-------------------------------------------------------------------------|------------|------------|------------|--------|---------|
| Difficult-to-diagnose diseases                                          | 30 (4.1)   | 23 (76.7)  | 7 (23.3)   | 1.933  | 0.164   |
| Rehabilitation                                                          | 368 (50.4) | 251 (68.2) | 117 (31.8) | 3.787  | 0.052   |
| Serious diseases                                                        | 23 (3.2)   | 15 (65.2)  | 8 (34.8)   | 0.002  | 0.966   |
| Seeking medicine                                                        | 518 (71.0) | 343 (66.2) | 175 (33.8) | 1.580  | 0.209   |
| <b>Evaluation of patients' medical expenses in tertiary A hospitals</b> |            |            |            | 8.352  | 0.079   |
| Very cheap                                                              | 28 (3.8)   | 24 (85.7)  | 4 (14.3)   |        |         |
| Relatively cheap                                                        | 35 (4.8)   | 26 (74.3)  | 9 (25.7)   |        |         |
| Moderate                                                                | 284 (38.9) | 176 (62.0) | 108 (38.0) |        |         |
| Relatively expensive                                                    | 334 (45.8) | 213 (63.8) | 121 (36.2) |        |         |
| Very expensive                                                          | 49 (6.7)   | 34 (69.4)  | 15 (30.6)  |        |         |
| <b>Evaluation of the extent patients respect doctors</b>                |            |            |            | 44.764 | <0.0001 |
| Not respect                                                             | 13 (1.8)   | 11 (84.6)  | 2 (15.4)   |        |         |
| Relatively not respect                                                  | 43 (5.9)   | 36 (83.7)  | 7 (16.3)   |        |         |
| Moderate                                                                | 354 (48.5) | 260 (73.4) | 94 (26.6)  |        |         |
| Relatively respect                                                      | 284 (38.9) | 145 (51.1) | 139 (48.9) |        |         |
| Respect                                                                 | 36 (4.9)   | 21 (58.3)  | 15 (41.7)  |        |         |

526 Asterisk (\*): MCQ means multiple-choice question. Participants can choose more  
 527 than one option in this question.

529 Table 4. Logistic regression analysis of job satisfaction and its influencing factors

| Parameter                                                                         | Estimate | P-value | OR       | 95% Wald confidence interval |             |
|-----------------------------------------------------------------------------------|----------|---------|----------|------------------------------|-------------|
|                                                                                   |          |         |          | Lower limit                  | Upper limit |
| <b>Whether doctors were satisfied with types of patients they treated</b>         |          |         |          |                              |             |
| Satisfied                                                                         | 0.876    | 0.0007  | 2.401    | 1.447                        | 3.982       |
| Not satisfied                                                                     | -0.244   | 0.408   | 0.784    | 0.440                        | 1.397       |
| Hard to say                                                                       | Ref      | Ref     | Ref      | Ref                          | Ref         |
| <b>Evaluation of the extent patients respect doctors</b>                          |          |         |          |                              |             |
| Not respect                                                                       | -1.050   | 0.261   | 0.350    | 0.056                        | 2.187       |
| Relatively not respect                                                            | -0.831   | 0.166   | 0.436    | 0.134                        | 1.412       |
| Moderate                                                                          | -0.612   | 0.136   | 0.542    | 0.242                        | 1.213       |
| Relatively respect                                                                | 0.223    | 0.573   | 1.256    | 0.568                        | 2.776       |
| Respect                                                                           | Ref      | Ref     | Ref      | Ref                          | Ref         |
| <b>Whether work intensity reflected work stress</b>                               |          |         |          |                              |             |
| No                                                                                | 0.527    | 0.009   | 1.695    | 1.143                        | 2.512       |
| Yes                                                                               | Ref      | Ref     | Ref      | Ref                          | Ref         |
| <b>Whether a poor social evaluation reflected work stress</b>                     |          |         |          |                              |             |
| No                                                                                | 0.813    | 0.0002  | 2.254    | 1.466                        | 3.466       |
| Yes                                                                               | Ref      | Ref     | Ref      | Ref                          | Ref         |
| <b>Work stress</b>                                                                |          |         |          |                              |             |
| Very light                                                                        | —        | —       | —        | —                            | —           |
| Relatively light                                                                  | 13.763   | 0.986   | >999.999 | <0.001                       | >999.999    |
| Moderate                                                                          | 1.034    | 0.001   | 2.813    | 1.553                        | 5.096       |
| Relatively great                                                                  | 0.061    | 0.763   | 1.063    | 0.714                        | 1.584       |
| Very great                                                                        | Ref      | Ref     | Ref      | Ref                          | Ref         |
| <b>Whether the work within work hours met hospital requirements</b>               |          |         |          |                              |             |
| Can                                                                               | 0.498    | 0.410   | 1.645    | 0.504                        | 5.366       |
| Mostly can                                                                        | 0.788    | 0.187   | 2.198    | 0.683                        | 7.080       |
| Mostly cannot                                                                     | -0.250   | 0.711   | 0.779    | 0.207                        | 2.926       |
| Cannot                                                                            | 0.585    | 0.482   | 1.795    | 0.352                        | 9.159       |
| Hard to say                                                                       | Ref      | Ref     | Ref      | Ref                          | Ref         |
| <b>Whether working long hours reflected work stress</b>                           |          |         |          |                              |             |
| No                                                                                | 0.303    | 0.111   | 1.354    | 0.933                        | 1.964       |
| Yes                                                                               | Ref      | Ref     | Ref      | Ref                          | Ref         |
| <b>Whether patients with common diseases were the population doctors expected</b> |          |         |          |                              |             |
| No                                                                                | -0.415   | 0.025   | 0.660    | 0.459                        | 0.945       |
| Yes                                                                               | Ref      | Ref     | Ref      | Ref                          | Ref         |
| <b>Whether patients with acute diseases were the population doctors expected</b>  |          |         |          |                              |             |
| No                                                                                | 0.360    | 0.084   | 1.434    | 0.953                        | 2.158       |
| Yes                                                                               | Ref      | Ref     | Ref      | Ref                          | Ref         |
| <b>Professional title</b>                                                         |          |         |          |                              |             |
| Junior                                                                            | -0.916   | 0.031   | 0.400    | 0.197                        | 0.811       |
| Intermediate                                                                      | -0.761   | 0.011   | 0.467    | 0.234                        | 0.933       |
| Associate senior                                                                  | -0.723   | 0.031   | 0.485    | 0.230                        | 1.022       |
| Senior                                                                            | Ref      | Ref     | Ref      | Ref                          | Ref         |

530

1  
2  
3  
4 **Supplementary Table 1. Multicollinearity analysis**

| 5 <b>Variable</b>                                                                                                          | <b>Tolerance</b> | <b>Variance Inflation<br/>6 Factor</b> |
|----------------------------------------------------------------------------------------------------------------------------|------------------|----------------------------------------|
| 7 Sex                                                                                                                      | 0.815            | 1.227                                  |
| 8 Education level                                                                                                          | 0.763            | 1.310                                  |
| 9 Position                                                                                                                 | 0.702            | 1.425                                  |
| 10 Professional title                                                                                                      | 0.583            | 1.716                                  |
| 11 Department                                                                                                              | 0.762            | 1.313                                  |
| 12 Work hours per week (hours)                                                                                             | 0.806            | 1.240                                  |
| 13 Whether the work within work hours met hospital requirements                                                            | 0.886            | 1.129                                  |
| 14 Life stress                                                                                                             | 0.595            | 1.680                                  |
| 15 Work stress                                                                                                             | 0.473            | 2.116                                  |
| 16 Whether current work stress increased compared to that in the past year                                                 | 0.737            | 1.356                                  |
| 17 Whether work intensity reflected work stress                                                                            | 0.717            | 1.394                                  |
| 18 Whether working long hours reflected work stress                                                                        | 0.741            | 1.350                                  |
| 19 Whether high expectations of patients reflected work stress                                                             | 0.794            | 1.259                                  |
| 20 Whether high job risks reflected work stress                                                                            | 0.718            | 1.393                                  |
| 21 Whether a poor patient-doctor relationship reflected work stress                                                        | 0.733            | 1.365                                  |
| 22 Whether a poor colleague relationship reflected work stress                                                             | 0.768            | 1.303                                  |
| 23 Whether fierce competition of promotion reflected work stress                                                           | 0.805            | 1.242                                  |
| 24 Whether a poor social evaluation reflected work stress                                                                  | 0.729            | 1.373                                  |
| 25 Whether social misunderstandings reflected work stress                                                                  | 0.697            | 1.435                                  |
| 26 Whether departments once organized a community health lecture                                                           | 0.679            | 1.473                                  |
| 27 Whether departments once participated in a volunteer medical<br>28 consultation                                         | 0.657            | 1.523                                  |
| 29 Whether patients with any kinds of diseases should seek medical<br>30 treatment in tertiary A public hospitals          | 0.587            | 1.703                                  |
| 31 Whether patients with chronic diseases should seek medical treatment in<br>32 tertiary A public hospitals               | 0.508            | 1.969                                  |
| 33 Whether patients with rare diseases should seek medical treatment in<br>34 tertiary A public hospitals                  | 0.440            | 2.271                                  |
| 35 Whether patients with common diseases should seek medical treatment<br>36 in tertiary A public hospitals                | 0.584            | 1.712                                  |
| 37 Whether patients with acute diseases should seek medical treatment in<br>38 tertiary A public hospitals                 | 0.531            | 1.883                                  |
| 39 Whether patients with difficult-to-diagnose diseases should seek medical<br>40 treatment in tertiary A public hospitals | 0.370            | 2.703                                  |
| 41 Whether patients with rehabilitation should seek medical treatment in<br>42 tertiary A public hospitals                 | 0.599            | 1.669                                  |
| 43 Whether patients with serious diseases should seek medical treatment in<br>44 tertiary A public hospitals               | 0.383            | 2.609                                  |
| 45 Whether patients with chronic diseases were the most doctors treated in<br>46 work hours                                | 0.675            | 1.481                                  |
| 47 Whether patients with rare diseases were the most doctors treated in<br>48 work hours                                   | 0.656            | 1.525                                  |

|    |                                                                          |       |       |
|----|--------------------------------------------------------------------------|-------|-------|
| 1  |                                                                          |       |       |
| 2  |                                                                          |       |       |
| 3  | work hours                                                               |       |       |
| 4  | Whether patients with common diseases were the most doctors treated      | 0.587 | 1.704 |
| 5  | in work hours                                                            |       |       |
| 6  | Whether patients with rare diseases were the most doctors treated in     | 0.747 | 1.338 |
| 7  | work hours                                                               |       |       |
| 8  | Whether patients with difficult-to-diagnose diseases were the most       | 0.622 | 1.608 |
| 9  | doctors treated in work hours                                            |       |       |
| 10 | Whether patients with rehabilitation diseases were the most doctors      | 0.689 | 1.451 |
| 11 | treated in work hours                                                    |       |       |
| 12 | Whether patients with serious diseases were the most doctors treated in  | 0.600 | 1.666 |
| 13 | work hours                                                               |       |       |
| 14 | Whether patients seeking medicine were the most doctors treated in       | 0.576 | 1.736 |
| 15 | work hours                                                               |       |       |
| 16 | Whether doctors were satisfied with types of patients they treated       | 0.787 | 1.270 |
| 17 | Whether patients with chronic diseases were the population doctors       | 0.630 | 1.587 |
| 18 | expected                                                                 |       |       |
| 19 | Whether patients with rare diseases were the population doctors          | 0.678 | 1.476 |
| 20 | expected                                                                 |       |       |
| 21 | Whether patients with common diseases were the population doctors        | 0.655 | 1.527 |
| 22 | expected                                                                 |       |       |
| 23 | Whether patients with acute diseases were the population doctors         | 0.770 | 1.298 |
| 24 | expected                                                                 |       |       |
| 25 | Whether patients with difficult-to-diagnose diseases were the population | 0.661 | 1.513 |
| 26 | doctors expected                                                         |       |       |
| 27 | Whether patients with rehabilitation diseases were the population        | 0.656 | 1.523 |
| 28 | doctors expected                                                         |       |       |
| 29 | Whether patients with serious diseases were the population doctors       | 0.601 | 1.665 |
| 30 | expected                                                                 |       |       |
| 31 | Whether patients seeking medicine were the population doctors            | 0.810 | 1.234 |
| 32 | expected                                                                 |       |       |
| 33 | Whether patients with chronic diseases should seek medical treatment in  | 0.721 | 1.387 |
| 34 | the community health system                                              |       |       |
| 35 | Whether patients with rare diseases should seek medical treatment in the | 0.751 | 1.332 |
| 36 | community health system                                                  |       |       |
| 37 | Whether patients with common diseases should seek medical treatment      | 0.822 | 1.216 |
| 38 | in community health system                                               |       |       |
| 39 | Whether patients with acute diseases should seek medical treatment in    | 0.785 | 1.274 |
| 40 | the community health system                                              |       |       |
| 41 | Whether patients with difficult-to-diagnose diseases should seek         | 0.697 | 1.435 |
| 42 | medical treatment in the community health system                         |       |       |
| 43 | Whether patients with rehabilitation diseases should seek medical        | 0.705 | 1.419 |
| 44 | treatment in the community health system                                 |       |       |
| 45 | Whether patients with serious diseases should seek medical treatment in  | 0.639 | 1.565 |
| 46 | the community health system                                              |       |       |
| 47 |                                                                          |       |       |
| 48 |                                                                          |       |       |
| 49 |                                                                          |       |       |
| 50 |                                                                          |       |       |
| 51 |                                                                          |       |       |
| 52 |                                                                          |       |       |
| 53 |                                                                          |       |       |
| 54 |                                                                          |       |       |
| 55 |                                                                          |       |       |
| 56 |                                                                          |       |       |
| 57 |                                                                          |       |       |
| 58 |                                                                          |       |       |
| 59 |                                                                          |       |       |
| 60 |                                                                          |       |       |

|   |                                                                        |       |       |
|---|------------------------------------------------------------------------|-------|-------|
| 1 |                                                                        |       |       |
| 2 |                                                                        |       |       |
| 3 | Whether patients seeking medicine should seek medical treatment in the | 0.714 | 1.400 |
| 4 | community health system                                                |       |       |
| 5 |                                                                        |       |       |
| 6 | Evaluation of patients' medical expenses in tertiary A hospitals       | 0.859 | 1.164 |
| 7 | Evaluation of the extent patients respect doctors                      | 0.789 | 1.267 |
| 8 |                                                                        |       |       |
| 9 | 2                                                                      |       |       |

10

11

12

13

14

15

16

17

18

19

20

21

22

23

24

25

26

27

28

29

30

31

32

33

34

35

36

37

38

39

40

41

42

43

44

45

46

47

48

49

50

51

52

53

54

55

56

57

58

59

60

For peer review only

STROBE Statement—Checklist of items that should be included in reports of *cross-sectional studies*

|                              | Item No | Recommendation                                                                                                                                                                                               | Reported on page # |
|------------------------------|---------|--------------------------------------------------------------------------------------------------------------------------------------------------------------------------------------------------------------|--------------------|
| <b>Title and abstract</b>    | 1       | (a) Indicate the study's design with a commonly used term in the title or the abstract                                                                                                                       | 1                  |
|                              |         | (b) Provide in the abstract an informative and balanced summary of what was done and what was found                                                                                                          | 2                  |
| <b>Introduction</b>          |         |                                                                                                                                                                                                              |                    |
| Background/rationale         | 2       | Explain the scientific background and rationale for the investigation being reported                                                                                                                         | 4-5                |
| Objectives                   | 3       | State specific objectives, including any prespecified hypotheses                                                                                                                                             | 5                  |
| <b>Methods</b>               |         |                                                                                                                                                                                                              |                    |
| Study design                 | 4       | Present key elements of study design early in the paper                                                                                                                                                      | 5-6                |
| Setting                      | 5       | Describe the setting, locations, and relevant dates, including periods of recruitment, exposure, follow-up, and data collection                                                                              | 5                  |
| Participants                 | 6       | (a) Give the eligibility criteria, and the sources and methods of selection of participants                                                                                                                  | 5                  |
| Variables                    | 7       | Clearly define all outcomes, exposures, predictors, potential confounders, and effect modifiers. Give diagnostic criteria, if applicable                                                                     | 6                  |
| Data sources/<br>measurement | 8*      | For each variable of interest, give sources of data and details of methods of assessment (measurement). Describe comparability of assessment methods if there is more than one group                         | 5-6                |
| Bias                         | 9       | Describe any efforts to address potential sources of bias                                                                                                                                                    | 5-6                |
| Study size                   | 10      | Explain how the study size was arrived at                                                                                                                                                                    | 5                  |
| Quantitative variables       | 11      | Explain how quantitative variables were handled in the analyses. If applicable, describe which groupings were chosen and why                                                                                 | 6                  |
| Statistical methods          | 12      | (a) Describe all statistical methods, including those used to control for confounding                                                                                                                        | 6-7                |
|                              |         | (b) Describe any methods used to examine subgroups and interactions                                                                                                                                          | 6-7                |
|                              |         | (c) Explain how missing data were addressed                                                                                                                                                                  | 5                  |
|                              |         | (d) If applicable, describe analytical methods taking account of sampling strategy                                                                                                                           | 6-7                |
|                              |         | (e) Describe any sensitivity analyses                                                                                                                                                                        | 6-7                |
| <b>Results</b>               |         |                                                                                                                                                                                                              |                    |
| Participants                 | 13*     | (a) Report numbers of individuals at each stage of study—eg numbers potentially eligible, examined for eligibility, confirmed eligible, included in the study, completing follow-up, and analysed            | 7                  |
|                              |         | (b) Give reasons for non-participation at each stage                                                                                                                                                         | 5                  |
|                              |         | (c) Consider use of a flow diagram                                                                                                                                                                           | 5                  |
| Descriptive data             | 14*     | (a) Give characteristics of study participants (eg demographic, clinical, social) and information on exposures and potential confounders                                                                     | 7-8                |
|                              |         | (b) Indicate number of participants with missing data for each variable of interest                                                                                                                          | 5                  |
| Outcome data                 | 15*     | Report numbers of outcome events or summary measures                                                                                                                                                         | 7                  |
| Main results                 | 16      | (a) Give unadjusted estimates and, if applicable, confounder-adjusted estimates and their precision (eg, 95% confidence interval). Make clear which confounders were adjusted for and why they were included | 8-10               |
|                              |         | (b) Report category boundaries when continuous variables were categorized                                                                                                                                    | 8-10               |
|                              |         | (c) If relevant, consider translating estimates of relative risk into absolute risk for                                                                                                                      | 8-10               |

a meaningful time period

|                          |    |                                                                                                                                                                            |       |
|--------------------------|----|----------------------------------------------------------------------------------------------------------------------------------------------------------------------------|-------|
| Other analyses           | 17 | Report other analyses done—eg analyses of subgroups and interactions, and sensitivity analyses                                                                             | 8-10  |
| <b>Discussion</b>        |    |                                                                                                                                                                            |       |
| Key results              | 18 | Summarise key results with reference to study objectives                                                                                                                   | 10    |
| Limitations              | 19 | Discuss limitations of the study, taking into account sources of potential bias or imprecision. Discuss both direction and magnitude of any potential bias                 | 14    |
| Interpretation           | 20 | Give a cautious overall interpretation of results considering objectives, limitations, multiplicity of analyses, results from similar studies, and other relevant evidence | 10-14 |
| Generalisability         | 21 | Discuss the generalisability (external validity) of the study results                                                                                                      | 10-14 |
| <b>Other information</b> |    |                                                                                                                                                                            |       |
| Funding                  | 22 | Give the source of funding and the role of the funders for the present study and, if applicable, for the original study on which the present article is based              | 15    |

\*Give information separately for exposed and unexposed groups.

**Note:** An Explanation and Elaboration article discusses each checklist item and gives methodological background and published examples of transparent reporting. The STROBE checklist is best used in conjunction with this article (freely available on the Web sites of PLoS Medicine at <http://www.plosmedicine.org/>, Annals of Internal Medicine at <http://www.annals.org/>, and Epidemiology at <http://www.epidem.com/>). Information on the STROBE Initiative is available at [www.strobe-statement.org](http://www.strobe-statement.org).
