# Supplementary material for: Cross-sectional survey on job satisfaction and its associated factors among doctors in tertiary public hospitals in Shanghai, China
Source: PubMed Central journal article supplement — BMJ Open. 2019 Mar 1;9(3):e023823. doi: 10.1136/bmjopen-2018-023823 (PMC6429855; doi:10.1136/bmjopen-2018-023823), 2019-03-01
Supplement: bmjopen-2018-023823supp001.pdf [file bmjopen-2018-023823supp001.pdf]

**Supplementary Table 1. Multicollinearity analysis**

| <b>Variable</b>                                                                                                   | <b>Tolerance</b> | <b>Variance Inflation Factor</b> |
|-------------------------------------------------------------------------------------------------------------------|------------------|----------------------------------|
| Sex                                                                                                               | 0.815            | 1.227                            |
| Education level                                                                                                   | 0.763            | 1.310                            |
| Position                                                                                                          | 0.702            | 1.425                            |
| Professional title                                                                                                | 0.583            | 1.716                            |
| Department                                                                                                        | 0.762            | 1.313                            |
| Work hours per week (hours)                                                                                       | 0.806            | 1.240                            |
| Whether the work within work hours met hospital requirements                                                      | 0.886            | 1.129                            |
| Life stress                                                                                                       | 0.595            | 1.680                            |
| Work stress                                                                                                       | 0.473            | 2.116                            |
| Whether current work stress increased compared to that in the past year                                           | 0.737            | 1.356                            |
| Whether work intensity reflected work stress                                                                      | 0.717            | 1.394                            |
| Whether working long hours reflected work stress                                                                  | 0.741            | 1.350                            |
| Whether high expectations of patients reflected work stress                                                       | 0.794            | 1.259                            |
| Whether high job risks reflected work stress                                                                      | 0.718            | 1.393                            |
| Whether a poor patient-doctor relationship reflected work stress                                                  | 0.733            | 1.365                            |
| Whether a poor colleague relationship reflected work stress                                                       | 0.768            | 1.303                            |
| Whether fierce competition of promotion reflected work stress                                                     | 0.805            | 1.242                            |
| Whether a poor social evaluation reflected work stress                                                            | 0.729            | 1.373                            |
| Whether social misunderstandings reflected work stress                                                            | 0.697            | 1.435                            |
| Whether departments once organized a community health lecture                                                     | 0.679            | 1.473                            |
| Whether departments once participated in a volunteer medical consultation                                         | 0.657            | 1.523                            |
| Whether patients with any kinds of diseases should seek medical treatment in tertiary A public hospitals          | 0.587            | 1.703                            |
| Whether patients with chronic diseases should seek medical treatment in tertiary A public hospitals               | 0.508            | 1.969                            |
| Whether patients with rare diseases should seek medical treatment in tertiary A public hospitals                  | 0.440            | 2.271                            |
| Whether patients with common diseases should seek medical treatment in tertiary A public hospitals                | 0.584            | 1.712                            |
| Whether patients with acute diseases should seek medical treatment in tertiary A public hospitals                 | 0.531            | 1.883                            |
| Whether patients with difficult-to-diagnose diseases should seek medical treatment in tertiary A public hospitals | 0.370            | 2.703                            |
| Whether patients with rehabilitation should seek medical treatment in tertiary A public hospitals                 | 0.599            | 1.669                            |
| Whether patients with serious diseases should seek medical treatment in tertiary A public hospitals               | 0.383            | 2.609                            |
| Whether patients with chronic diseases were the most doctors treated in work hours                                | 0.675            | 1.481                            |
| Whether patients with rare diseases were the most doctors treated in                                              | 0.656            | 1.525                            |

|                                                                                                                   |       |       |
|-------------------------------------------------------------------------------------------------------------------|-------|-------|
| work hours                                                                                                        |       |       |
| Whether patients with common diseases were the most doctors treated in work hours                                 | 0.587 | 1.704 |
| Whether patients with rare diseases were the most doctors treated in work hours                                   | 0.747 | 1.338 |
| Whether patients with difficult-to-diagnose diseases were the most doctors treated in work hours                  | 0.622 | 1.608 |
| Whether patients with rehabilitation diseases were the most doctors treated in work hours                         | 0.689 | 1.451 |
| Whether patients with serious diseases were the most doctors treated in work hours                                | 0.600 | 1.666 |
| Whether patients seeking medicine were the most doctors treated in work hours                                     | 0.576 | 1.736 |
| Whether doctors were satisfied with types of patients they treated                                                | 0.787 | 1.270 |
| Whether patients with chronic diseases were the population doctors expected                                       | 0.630 | 1.587 |
| Whether patients with rare diseases were the population doctors expected                                          | 0.678 | 1.476 |
| Whether patients with common diseases were the population doctors expected                                        | 0.655 | 1.527 |
| Whether patients with acute diseases were the population doctors expected                                         | 0.770 | 1.298 |
| Whether patients with difficult-to-diagnose diseases were the population doctors expected                         | 0.661 | 1.513 |
| Whether patients with rehabilitation diseases were the population doctors expected                                | 0.656 | 1.523 |
| Whether patients with serious diseases were the population doctors expected                                       | 0.601 | 1.665 |
| Whether patients seeking medicine were the population doctors expected                                            | 0.810 | 1.234 |
| Whether patients with chronic diseases should seek medical treatment in the community health system               | 0.721 | 1.387 |
| Whether patients with rare diseases should seek medical treatment in the community health system                  | 0.751 | 1.332 |
| Whether patients with common diseases should seek medical treatment in community health system                    | 0.822 | 1.216 |
| Whether patients with acute diseases should seek medical treatment in the community health system                 | 0.785 | 1.274 |
| Whether patients with difficult-to-diagnose diseases should seek medical treatment in the community health system | 0.697 | 1.435 |
| Whether patients with rehabilitation diseases should seek medical treatment in the community health system        | 0.705 | 1.419 |
| Whether patients with serious diseases should seek medical treatment in the community health system               | 0.639 | 1.565 |

|                                                                                                |       |       |
|------------------------------------------------------------------------------------------------|-------|-------|
| Whether patients seeking medicine should seek medical treatment in the community health system | 0.714 | 1.400 |
| Evaluation of patients' medical expenses in tertiary A hospitals                               | 0.859 | 1.164 |
| Evaluation of the extent patients respect doctors                                              | 0.789 | 1.267 |

---

2
